# Supplementary material for: Time to initiation of antenatal care and its predictors among pregnant women in Ethiopia: a multilevel mixed-effects acceleration failure time model
Source: PubMed Central journal article supplement — BMJ Open. 2024 Apr 19;14(4):e075965. doi: 10.1136/bmjopen-2023-075965 (PMC11033649; doi:10.1136/bmjopen-2023-075965), 2024-04-19
Supplement: bmjopen-2023-075965.draft_revisions.pdf [file bmjopen-2023-075965.draft_revisions.pdf]

# BMJ Open

BMJ Open is committed to open peer review. As part of this commitment we make the peer review history of every article we publish publicly available.

When an article is published we post the peer reviewers' comments and the authors' responses online. We also post the versions of the paper that were used during peer review. These are the versions that the peer review comments apply to.

The versions of the paper that follow are the versions that were submitted during the peer review process. They are not the versions of record or the final published versions. They should not be cited or distributed as the published version of this manuscript.

BMJ Open is an open access journal and the full, final, typeset and author-corrected version of record of the manuscript is available on our site with no access controls, subscription charges or pay-per-view fees (<http://bmjopen.bmj.com>).

If you have any questions on BMJ Open's open peer review process please email [info.bmjopen@bmj.com](mailto:info.bmjopen@bmj.com)

# BMJ Open

## Time to initiation of antenatal care and its predictors among Ethiopian women: Multilevel Mixed-effects Acceleration Failure Time model

|                               |                                                                                                                                                                                                                                                                                                                                                                                                                                                                       |
|-------------------------------|-----------------------------------------------------------------------------------------------------------------------------------------------------------------------------------------------------------------------------------------------------------------------------------------------------------------------------------------------------------------------------------------------------------------------------------------------------------------------|
| Journal:                      | <i>BMJ Open</i>                                                                                                                                                                                                                                                                                                                                                                                                                                                       |
| Manuscript ID                 | bmjopen-2023-075965                                                                                                                                                                                                                                                                                                                                                                                                                                                   |
| Article Type:                 | Original research                                                                                                                                                                                                                                                                                                                                                                                                                                                     |
| Date Submitted by the Author: | 25-May-2023                                                                                                                                                                                                                                                                                                                                                                                                                                                           |
| Complete List of Authors:     | Abasimel , Husen; Salale University, Midwifery<br>Awol, Mukemil; College of Health Sciences Salale University, Department of Midwifery<br>Tufa, Derara Girma; College of Health Sciences Salale University, Department of Public Health<br>Israel, Hana; Jimma University College of Public Health and Medical Sciences, Midwifery<br>Getachew, Tewodros; Hawassa University College of Medicine and Health Sciences<br>Oyato, Befekadu; Salale University, Midwifery |
| Keywords:                     | OBSTETRICS, CHEMOTHERAPY, CLINICAL PHYSIOLOGY, GYNAECOLOGY                                                                                                                                                                                                                                                                                                                                                                                                            |
|                               |                                                                                                                                                                                                                                                                                                                                                                                                                                                                       |

SCHOLARONE™  
Manuscripts

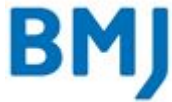

I, the Submitting Author has the right to grant and does grant on behalf of all authors of the Work (as defined in the below author licence), an exclusive licence and/or a non-exclusive licence for contributions from authors who are: i) UK Crown employees; ii) where BMJ has agreed a CC-BY licence shall apply, and/or iii) in accordance with the terms applicable for US Federal Government officers or employees acting as part of their official duties; on a worldwide, perpetual, irrevocable, royalty-free basis to BMJ Publishing Group Ltd ("BMJ") its licensees and where the relevant Journal is co-owned by BMJ to the co-owners of the Journal, to publish the Work in this journal and any other BMJ products and to exploit all rights, as set out in our [licence](#).

The Submitting Author accepts and understands that any supply made under these terms is made by BMJ to the Submitting Author unless you are acting as an employee on behalf of your employer or a postgraduate student of an affiliated institution which is paying any applicable article publishing charge ("APC") for Open Access articles. Where the Submitting Author wishes to make the Work available on an Open Access basis (and intends to pay the relevant APC), the terms of reuse of such Open Access shall be governed by a Creative Commons licence – details of these licences and which [Creative Commons](#) licence will apply to this Work are set out in our licence referred to above.

Other than as permitted in any relevant BMJ Author's Self Archiving Policies, I confirm this Work has not been accepted for publication elsewhere, is not being considered for publication elsewhere and does not duplicate material already published. I confirm all authors consent to publication of this Work and authorise the granting of this licence.

1  
2  
3 **Time to initiation of antenatal care and its predictors among Ethiopian**  
4  
5  
6 **women: Multilevel Mixed-effects Acceleration Failure Time model**  
7

8 Husen Zakir **Abasimel**<sup>1\*</sup>, Mukemil Awol<sup>1</sup>, Derara **Girma**<sup>2</sup>, Hana **Israel**<sup>3</sup>,  
9  
10 Tewodros **Getachew**<sup>4</sup>, Befekadu Tesfaye **Oyato**<sup>1</sup>  
11

12  
13 <sup>1</sup>Department of Midwifery, College of Health Sciences, Salale University, Fitcha, Ethiopia  
14

15 <sup>2</sup>Department of Public health, College of Health Sciences, Salale University, Fitcha, Ethiopia  
16

17 <sup>3</sup>Department of Midwifery, Institution of Health, Jimma University, Jimma, Ethiopia  
18

19 <sup>4</sup>Department of Midwifery, College of Health Sciences, Hawassa University, Hawassa, Ethiopia  
20  
21

22 **E-mail:**

23  
24 HZA: [husniselam@gmail.com](mailto:husniselam@gmail.com)  
25

26  
27 MA: [mukemilawol2006@gmail.com](mailto:mukemilawol2006@gmail.com)  
28

29  
30 DG: [deraragirma24@gmail.com](mailto:deraragirma24@gmail.com)  
31

32  
33 HI: [hanaisrael4@gmail.com](mailto:hanaisrael4@gmail.com)  
34

35  
36 TG: [tedi0925@gmail.com](mailto:tedi0925@gmail.com)  
37

38  
39 BTO: [befekadutes2016@gmail.com](mailto:befekadutes2016@gmail.com)  
40

41 Corresponding Authors: Husen Zakir **Abasimel** (HZA)

42  
43 E-mail: [husniselam@gmail.com](mailto:husniselam@gmail.com)  
44  
45  
46  
47  
48  
49  
50  
51  
52  
53  
54  
55  
56  
57  
58  
59  
60

## Abstract

**Background:** Pregnancy-related preventable morbidity and mortality are still at unacceptable levels at the start of the Sustainable Development Goals era. On the top of negative correlation with maternal morbidity, ANC has positive correlation with health facility delivery. Yet, in Ethiopia, the rate of early ANC initiation ranges from 21.71% in the south to 46.8% in the north. Thus, this study aimed to identify the time-to-initiation of ANC and its predictors in Ethiopia using a nationally representative survey data.

**Methods:** This study included a weighted sample of 2933 women aged 15 to 49 who had an ANC visit for their most recent child within the five years prior to the survey and whose gestational age was known at the first antenatal visits. To investigate the individual and communal factors that influence the timely initiation of ANC, a multilevel mixed-effects Weibull distribution survival regression model was fitted. The Adjusted Acceleration Factor (AAF) with its 95% confidence interval (CI) was applied to present the findings.

**Results:** In this study, the estimated mean survival time of pregnant women to initiate the first ANC visit in Ethiopia was found to be 6.8 months (95% CI: 6.68, 6.95). Women whose last birth was a caesarean section (AFT = 0.72; 95% CI: 0.63, 0.82), women who have media access (AAF = 0.90; 95% CI: 0.81, 0.99), and women with higher education (AAF = 0.71; 95% CI: 0.59, 0.85) and women with primary education (AAF = 0.89; 95% CI: 0.80, 0.98) had a shorter time to initiate ANC early in the first trimester of pregnancy. However, being grand multiparous (AAF = 1.19; 95% CI: 1.02, 1.39), being previously in a union (AAF = 1.43; 95% CI: 1.14, 1.78), having a home birth (AFT = 1.34; 95% CI: 1.20, 1.49), and living in a rural area (AAF = 1.20; 95% CI: 1.01, 1.43) were the impediments for early ANC initiation.

**Conclusion:** Women in this study area sought their initial antenatal care far later than the WHO recommended. It's crucial to provide health education with a focus on empowering expectant mothers to timely activate prenatal care, especially for those who give birth at home and for those who reside in remote areas. Expanding health education through the use of media should also be a part of initiatives to boost the timely initiation of antenatal care utilization.

**Keywords:** antenatal care, mixed-effects model, acceleration failure time, Ethiopia

## Strength and limitations of this study

- This study employed a multilevel mixed-effects parametric survival model to identify predictors of infant mortality.
- This study used a large sample from nationally representative survey data to identify both individual-level and community-level predictors.
- The study used retrospective birth history data to analyze infant mortality, and is likely to suffer from mothers' recall bias.

## Introduction

A healthy pregnancy for both mother and child, a smooth transition to a happy labor and delivery experience, and successful parenthood are all aspects of the positive pregnancy experience that women want and need(1). However, the morbidity and mortality rates associated with pregnancy that are preventable are still too high at the outset of the Sustainable Development Goals (SDG) period. In order to improve the pregnancy's outcome, antenatal care (ANC) is a crucial time for health promotion, screening, and disease prevention(2). ANC exhibits a positive link with delivery in a medical facility on top of the negative correlation with maternal morbidity(3).

Early detection of modifiable risk factors and pre-existing conditions is made possible by timely prenatal care initiation, which is defined as the first antenatal contact taking place during the first trimester of pregnancy(4). The 2016 World Health Organization (WHO) recommendation also suggests early beginning of ANC within the first 12 weeks of gestation(2). Women with early ANC initiation are more likely to have sufficient amount of antenatal care contacts(5).

1  
2  
3 There has been a significant improvement in the estimated global coverage of early prenatal care  
4 visits, going from 40.9% in 1990 to 84.8% in 2013, or a 43.3% increase(4).The Estimated  
5 coverage of early prenatal care visits in low-income countries (LMICs) in 2013 was 24 percent,  
6 compared to 81 percent in high-income countries(4).Data from these nations' Demographic  
7 Health Surveys (DHS) from 2012 to 2018 show that this percentage has climbed to 44.3% (5).  
8 Yet, this shows that the rate of early initiation of ANC in the LMICs is very far from the optimal  
9 level.  
10  
11  
12  
13  
14  
15  
16  
17  
18  
19

20 A woman dies every two minutes due to pregnancy or childbirth according to United Nations  
21 (UN) estimates(6).The poorest nations and those experiencing conflict continue to have the  
22 highest rates of maternal fatalities. With 3.6% of all maternal deaths worldwide in 2020, Ethiopia  
23 had the fourth-highest estimated number of maternal deaths, behind Democratic Republic of the  
24 Congo, Nigeria, and India(6). Timely ANC initiation is essential to lowering maternal morbidity  
25 and mortality in countries with high rates of maternal morbidity and mortality(7).  
26  
27  
28  
29  
30  
31  
32  
33  
34

35 The magnitude timely initiation of ANC visit in Sub-Saharan Africa was 38.0%, ranging from  
36 14.5% in Mozambique to 68.6% in Liberia(8). In Ethiopia, being one of the SSA countries, the  
37 problem is even worse. The median time to antenatal care initiation in the country was found to  
38 be 5 months(9). The result from 2016 Ethiopian Demographic Health Survey (EDHS) revealed  
39 only 20% of pregnant women in Ethiopia start their ANC during the first trimester of their  
40 pregnancy(10). Other studies in the country reported varying magnitude of early initiation of  
41 ANC; the proportion was found to be 46.8% in Bahirdar(11), 21.71% in southern Ethiopia(12),  
42 40.6% in Debre Markos(13), 39.5% in Tselemt district of Tigray Region(14), 27.5% in  
43 Axum(15), 28.8% in Ilu Ababor(16), 34% in Bench-Sheko zone(17).  
44  
45  
46  
47  
48  
49  
50  
51  
52  
53  
54  
55  
56  
57  
58  
59  
60

1  
2  
3 Predictors of timing of first antenatal care follow up from different literatures were  
4 residence(18)(10)(19), household wealth(20)(18), educational status of the women(18)(21)(15),  
5  
6 media exposure(19)(21)(18), occupation of the women(22)(23)(24), parity(21)(25)(26), husband  
7  
8 education(20)(19), husband occupation(19), distance from health facility(26)(18)and maternal  
9  
10 age(20)(18)(27).  
11  
12  
13  
14

15  
16 Despite various studies on identifying risk factors for time to first ANC follow-up were  
17  
18 conducted in Ethiopia, only few studies found to be representative at the national level.  
19  
20 Furthermore, almost all of the studies failed to consider community-level factors for time to  
21  
22 initiation of ANC in Ethiopia. Updated and nationally representative information is very crucial  
23  
24 for policy makers and other concerned bodies to improve the level of early antenatal care  
25  
26 initiation. Therefore, this study undertook a retrospective analysis based on the 2019 Ethiopian  
27  
28 Mini Demographic and Health survey (EMDHS) data set, to identify time-to-initiation of ANC  
29  
30 and its predictors in Ethiopia.  
31  
32  
33

## 34 35 **Methods**

### 36 37 38 **Study design and area**

39  
40 This study undertook a retrospective analysis based on the 2019 Ethiopian Mini Demographic  
41  
42 and Health survey (EMDHS) data set. Ethiopia is located in the Horn of Africa and shares a  
43  
44 border with Eritrea, Djibouti, Somalia, Sudan, South Sudan, and Kenya. It is the second most  
45  
46 populous nation in Africa, with over 110 million populations(28). Based on the 2021 World  
47  
48 Bank reports Ethiopia had a gross national income per capital of US\$ 940(29).  
49  
50  
51

### 52 53 **Source of data**

54  
55 The data were obtained from EMDHS 2019, specifically the under-five children's file (KR)  
56  
57  
58  
59  
60



(<http://www.measuredhs.com>). The unweighted sample consisted of 5753 women who had live births in the five years preceding the survey. The 2019 EMDHS sample was stratified and selected in two stages, and interviews were conducted face-to-face with permanent residents and visitors who stayed in the residences the day before the survey. The 2019 EMDHS sampling frame is a composite of all census enumeration areas (EAs) created for the upcoming 2019 Ethiopia Population and Housing Census (PHC) conducted by the Central Statistical Agency (CSA). The census frame includes the complete list of 149,093 EAs created for the 2019 PHC. An EA is a geographical area with an average of 131 households. The sampling frame includes data on the EA's location, type of residence (urban or rural), and the estimated number of residential households(30).

### Study population

The study included pregnant women aged 15–49 years old whose gestational age was known at the first Antenatal visits. Women who had ANC visits but whose gestational age at the time was unknown (unrecorded) were excluded from this study.

### Study variables

#### Outcome of interest

The dependent variable is time-to-first ANC receipt among pregnant women which is measured in months. The event of interest considered as success (event = 1) if women had antenatal care in the first trimester of pregnancy and otherwise censored (censored = 0).

#### Independent variable

**Individual level factors** were women education level, household wealth index, birth interval, number of antenatal care visit, age of the women, media exposure and marital status.

1  
2  
3 **Community level factors** were residence, region, community educational status,  
4 communityANC coverage and community poverty. The EMDHS did not collect data that can  
5 directly describe the clusters' characteristics except the place of residence and region. Therefore,  
6 other common community-level data were generated by aggregating the individual  
7 characteristics with our interest in a cluster. The aggregates were computed using the proportion  
8 of a given variables'  
9 subcategory we were concerned on in a given cluster. Since the aggregate value for all generated  
10 variable was not normally distributed. It was categorized into groups based on the national  
11 median values.  
12  
13  
14  
15  
16  
17  
18  
19  
20  
21  
22  
23

### 24 **Operational definition**

25  
26 **Exposure to mass media:** a frequency of listening to the radio and watching television were  
27 considered exposure to mass media in this study by excluding exposure to magazines and  
28 newspapers. So, women exposed to either television or radio at least once per week considered  
29 exposed, if not exposed at all, taken as not exposed.  
30  
31  
32  
33  
34

35  
36 **Community women education:** Was defined as the proportion of mother's who attended  
37 primary/secondary/ higher education within the cluster. The aggregate of individual mother's  
38 primary/secondary/higher educational attainment can show the overall educational status of  
39 women within the cluster. There were two categories for this variable with reference to the  
40 national median value: higher proportion of mother's who attended primary/secondary/higher  
41 education and lower proportion of mother's who attended primary/secondary/higher education  
42 within the cluster.  
43  
44  
45  
46  
47  
48  
49  
50

51 **Antenatal care utilization:** was defined as mothers who had at least four antenatal care visit(2).  
52  
53  
54  
55  
56  
57  
58  
59  
60

1  
2  
3 **Community antenatal coverage:** The proportion of women in the clusters who had four and  
4 above antenatal care (ANC) from a skilled provider during the pregnancy of last delivery.  
5

6  
7 **Community poverty status:** It is defined as the proportion of poor or poorest mothers within the  
8 cluster. Within the cluster proportion of poor or poorest were aggregated and show over all  
9 poverty status within the cluster.  
10  
11  
12  
13

### 14 15 **Data Quality Control and Assurance**

16  
17 The data sets for the original work were collected by face-to-face interviewing women using  
18 structured questionnaires that met the eligibility criteria. The woman's questionnaire, the  
19 household questionnaire, and the Health Facility Questionnaire were employed to gather  
20 essential information. After the questionnaires were finalized in English, they were translated  
21 into Amharic, Tigrinya, and Afaan Oromo. In addition to this, the gathered data was back-  
22 translated into English to keep consistency. The quality of the dataset has maintained by testing  
23 its completeness. Moreover, the quality of the original data set was maintained by giving training  
24 to interviewers, and interviewers used tablet computers to record responses during the  
25 interviews.  
26  
27  
28  
29  
30  
31  
32  
33  
34  
35  
36  
37

38 For this study, the data were weighted using sampling weight before any statistical analysis to  
39 restore the representativeness of the data and to get a reliable estimate and standard error. The  
40 weighted results from the analysis were reported in the study. Multicollinearity between  
41 independent variables was checked using Variance Inflation Factor (VIF) and the mean VIF was  
42 2.11. The proportional hazards (PH) assumption was tested using Scaled Schoenfeld residuals  
43 and found to be unsatisfied, with a global test value of 0.0001. The data was also assessed for an  
44 interaction factor.  
45  
46  
47  
48  
49  
50  
51  
52  
53  
54  
55  
56  
57  
58  
59  
60

## Data Management and Analysis

STATA version 14 software was used for cleaning, recoding, and analyzing the data. Descriptive statistics were applied using frequencies and percentages. Estimation of survival probability was done by using the Kaplan Meier survival curve. Survival curves were compared by log-rank test. Univariate survival regression was fitted for explanatory variables and those having p-value  $\leq 0.25$  level of significance were considered for the multivariable analysis. Then, the study applied a stepwise backward variable selection procedure to obtain the final reduced model. Finally, a multivariable mixed-effects parametric Weibull distribution survival regression model was fitted. Adjusted Acceleration Factor (AAF) with its 95% confidence interval (CI) was applied, and covariates with a P-value  $< 0.05$  in the multivariable analysis were considered determinants of the survival time to first ANC visit.

### Survival analysis

Survival analysis deals with the analysis of survival data, which is used to measure the time to an event of interest, such as death or failure. The survival times for subjects who left the study early or who finished it without experiencing the event of interest are censored. Each uncensored observation is taken to indicate an event or death(31).

Let T denote the random variable for the survival time of a subject. Assume  $f(t)$ ,  $t \geq 0$ , denote the probability density function (pdf) of T, and let  $F(t) = P(T \leq t)$ ,  $t \geq 0$ , be the cumulative distribution function (CDF) of T. The distribution of T is called the survival time distribution. The survival function,  $S(t)$ , is defined as the probability that a subject survives up to time t(31):

$$S(t) = P(T > t) = 1 - F(t), t \geq 0 \dots\dots\dots 1$$

### Mixed-effects parametric survival analysis

The EMDHS used a multistage cluster sampling technique, whereby data were hierarchical (i.e., mothers and infants were nested within households, and households were nested within clusters). Considering the hierarchical nature of EMDHS data, mothers and infants who lived within the same cluster may have had similar characteristics to other mothers and infants compared to those in other parts of the country. Considering the clustered sampling approach, a two-stage multivariable mixed-effects parametric survival regression analysis was used to estimate the effects of individual and community level determinants on infant mortality.

Mixed-effects survival models contain both fixed effects and random effects. Random effects are useful for modeling intraclass correlations; that is, observations in the same cluster are correlated because they share common cluster-level random effects. Mixed effects parametric survival model makes the often more plausible assumption that random effects are normally distributed, meaning frailties are lognormal. It also helps to extend the types of models that we can fit beyond two-level models with random intercepts(32).

Parametric survival mixed-effects models use a trivariate response variable  $(t_0; t; d)$ , where each response corresponds to a period under observation  $(t_0; t]$  and results in either failure  $(d = 1)$  or right censoring  $(d = 0)$  at time  $t$ . Accelerated Failure Time (AFT) model is a model used for adjusting survivor functions for the effects of covariates. In the AFT parameterization, the natural logarithm of the survival time,  $\log t$ , is expressed as a linear function of the covariates(31):

$$\log(t_j) = X_j\beta + Z_ju_j + v_j \dots \dots \dots 2$$

for  $j = 1, \dots, M$  clusters with cluster  $j$  consisting of  $i = 1, \dots, n_j$  observations. The vector  $x_{ji}$  contains the covariates for the fixed effects, with regression coefficients (fixed effect)  $\beta$ . The

vector  $z_{ji}$  contains the covariates corresponding to the random effects  $u_j$ .  $v_{ji}$  are observation-level errors with density  $\phi(\cdot)$ . The distributional form of the error term determines the regression model. Five regression models are implemented in *mestreg* using the AFT parameterization: exponential, gamma, loglogistic, lognormal, and Weibull. Therefore, this study fitted a random-effects Weibull model with normally distributed random effects. This model can be viewed as a shared frailty model with lognormal frailty.

Four models were fitted to identify community and individual level factors associated with infant death. The first model (Model 1 or empty model) contained no explanatory variables. The second model (Model 2) considered only the individual-level variables in order to examine the individual-level effect. The third model (Model 3) considered only the community-level variables in order to examine the effect of community-level factors on infant death, independent of other factors. The fourth model (Model 4) is the full model that incorporated all individual and community-level variables into the multilevel analysis. Backward stepwise parametric survival regression analysis was performed to select individual and community-level variables for each model, and then all those selected variables were incorporated in to the multilevel modeling.

The fixed effect sizes of individual and community-level determinants of the survival time to first ANC visit were expressed as AAFs with 95% CI. The P-value  $<0.05$  has been considered as statistically significant. Additionally, the measure of variance (random effects) was reported in terms of the intraclass correlation coefficient (ICC), median acceleration factor (MAF), and proportional change in variance (PCV).

ICC is a measure of within-cluster variation, the variation between individuals within the same cluster, and it was calculated using the formula(33):

$$ICC = (\delta_A) / (\delta_A + \pi^2/3) \dots \dots \dots 3$$

Where  $\delta_A$  is the estimated variance in each model, which has been described elsewhere. The total variation attributed to individual or/and community level factors in each model were measured by the proportional change in variance (PCV), which was calculated as(33):

$$PCV = (\delta_A - \delta_B)/(\delta_A) \dots\dots\dots 4$$

Where  $\delta_A$  = variance of the initial model, and  $\delta_B$  = variance of the model with more terms. The MAF is the median acceleration factor between the individual of higher propensity and the individuals of lower propensity when comparing two individuals from two different randomly chosen clusters, and it measures the unexplained cluster heterogeneity, the variation between clusters by comparing two persons from two randomly chosen different clusters. It was computed using the formula:

$$MAF = \exp(\sqrt{2} * \delta_A * 0.6745) \dots\dots\dots 5$$

Where  $\delta_A$  is the cluster level variance. The MAF measure is always greater than or equal to 1. If the MAF is 1, there is no variation between clusters(31).

### The best fit model selection

Model fitness was checked using Akakian Information Criteria (AIC) and Deviance Information Criteria (DIC). The lowest AIC and DIC values declare the best fit model(31).

## Result

### Descriptive statistics

A total of **2933 (un weighted)** women were followed for a minimum of 1 and a maximum of 10 months with an average follow up time of 4 months. In this study, timely initiation of ANC visit in Ethiopia was found to be 42.7% (95% CI: 41.0 – 44.6). The estimated mean (restricted)

1  
2  
3 survival time of pregnant women to initiate the first ANC visit was 6.8 months (95% CI: 6.68,  
4 6.95). The overall incidence rate was approximately 11 per 100 person month of  
5 observation. Majority 2755 (94.2%) of women were currently married or in union, and of these  
6 1030 (37.4%) had initiated ANC visit early in the first trimester of pregnancy. Regarding women  
7 education, 1283 (43.9%) women had no education, and among these 404 (31.5%) initiated their  
8 ANC visit timely. Access to media was reported by 1259 (43.1%) of whom 582 (46.2%) had  
9 started ANC visit within 12 weeks of pregnancy. More than half 114 (58.5%) of women who  
10 gave birth by C/S started their first ANC visit within the first trimester Table 1.

11  
12 Most 2052 (70.2%) of the women were rural residents, and among these only 647 (31.5%) women  
13 initiated ANC visit within the recommended time. The proportion of women starting first ANC  
14 visit within the first trimester was higher in Harari (66.7%), Dire Dawa (66.7%) and Addis  
15 Ababa (65%), whereas lower in the SNNPR (28.8%), Oromia (33.2%) and Somali (33.3%)  
16 regional states. More than half 1577 (53.9%) of the women were from a community with a low  
17 poor proportion of whom 740 (46.9%) commenced their first ANC visit in the first three months  
18 of pregnancy. Moreover, 353 (26.2%) women from a community with a high poor proportion  
19 commenced their first ANC visit timely Table 1.

20  
21  
22  
23  
24  
25  
26  
27  
28  
29  
30  
31  
32  
33  
34  
35  
36  
37  
38  
39  
40  
41  
42 **Table 1 Summary of individual and community level factors of time to ANC initiation**  
43 **among study participants (2924), 2022**

| Covariates         | Categories | Time to ANC initiation |                | Total N (%) |
|--------------------|------------|------------------------|----------------|-------------|
|                    |            | Event N (%)            | Censored N (%) |             |
| Maternal education | Higher     | 105(68.6)              | 48(31.4)       | 153(5.2)    |
|                    | Secondary  | 130(38.8)              | 205(61.2)      | 335(11.5)   |
|                    | Primary    | 452(39.2)              | 701(60.8)      | 1153(39.4)  |



|                   |                 |           |            |            |
|-------------------|-----------------|-----------|------------|------------|
|                   | No education    | 404(31.5) | 879(68.5)  | 1283(43.9) |
| Wealth Index      | Rich            | 647(48)   | 701(52)    | 1348(46.1) |
|                   | Middle          | 182(31)   | 407(69)    | 589(20.1)  |
|                   | Poor            | 264(26.7) | 723(73.3)  | 987(33.8)  |
| Household size    | 1-5             | 692(43.3) | 907(56.7)  | 1599(54.7) |
| (members)         | 6 or more       | 401(30.3) | 924(69.7)  | 1325(45.3) |
| Maternal age      | <20 years       | 48(31.4)  | 105(68.6)  | 153(5.2)   |
|                   | 20-34 years     | 846(39.2) | 1310(60.8) | 2156(73.8) |
|                   | ≥35 years       | 199(32.4) | 416(67.6)  | 615(21)    |
| Household head    | Female          | 156(40.4) | 230(59.6)  | 386(13.2)  |
|                   | Male            | 937(36.9) | 1601(63.1) | 2538(86.8) |
| Place of delivery | Facility        | 801(42.4) | 1088(57.6) | 1889(64.6) |
|                   | Home            | 292(28.2) | 743(71.8)  | 1035(35.4) |
| PNC               | No              | 881(36.5) | 1532(63.5) | 2413(82.5) |
|                   | Yes             | 212(41.5) | 299(58.5)  | 511(17.5)  |
| Last birth C/S    | No              | 804(34.9) | 1502(65.1) | 2306(92.2) |
|                   | Yes             | 114(58.5) | 81(41.5)   | 195(7.8)   |
| Birth interval    | ≥36 months      | 478(37.6) | 792(62.4)  | 1270(57.2) |
| (2220)            | <36 months      | 305(32.1) | 645(67.9)  | 950(42.8)  |
| Ever had a child  | No              | 939(39.7) | 1429(60.3) | 2368(81)   |
| loss              | Yes             | 154(27.7) | 402(72.3)  | 556(9)     |
| Parity            | Primi-para      | 299(43.4) | 390(56.6)  | 689(23.6)  |
|                   | Multipara       | 559(40.8) | 811(59.2)  | 1370(46.8) |
|                   | Grand Multipara | 235(27.2) | 630(72.8)  | 865(29.6)  |
| Residence         | Urban           | 445(51)   | 427(49)    | 872(29.8)  |
|                   | Rural           | 647(31.5) | 1405(68.5) | 2052(70.2) |
| Community ANC     | High            | 718(43.3) | 937(56.6)  | 1655(56.6) |
| utilization       | Low             | 375(29.6) | 894(70.4)  | 1269(43.4) |
| Community         | High            | 696(39.7) | 1056(60.3) | 1752(59.9) |
| women education   | Low             | 397(33.9) | 775(66.1)  | 1172(40.1) |

|                 |      |           |           |            |
|-----------------|------|-----------|-----------|------------|
| Community level | Low  | 740(46.9) | 837(53.1) | 1577(53.9) |
| poverty         | High | 353(26.2) | 994(73.8) | 1347(46.1) |

### Comparison of the different covariate in terms of survival time to first ANC visit

Kaplan Meier graphs are generated to observe the difference in the survival time to first ANC visit of women for different categorical variables. The log-rank test was carried out to validate the difference between the groups of each categorical variable. The log-rank test result (Table 2) shows that there is statistically significant difference in the survival experience of groups among women education level ( $p < 0.0001$ ), wealth index ( $p < 0.0001$ ), delivery place ( $p < 0.0001$ ), parity ( $p < 0.0001$ ), media access ( $p < 0.0001$ ), region ( $p < 0.0001$ ), women age ( $p < 0.001$ ) and Marital status ( $p < 0.2$ )Table 2.

**Table 2 Comparison of survival time of individual and community level factors of time to ANC initiation among study participants (2924), 2022**

| Covariates            | Categories   | Time to ANC initiation |                | Log-rank test | P-value |
|-----------------------|--------------|------------------------|----------------|---------------|---------|
|                       |              | Event observed         | Event expected |               |         |
| Mothers education     | No education | 404                    | 488            | 114.88        | 0.0001  |
|                       | Primary      | 452                    | 431            |               |         |
|                       | Secondary    | 131                    | 126            |               |         |
|                       | Higher       | 105                    | 47             |               |         |
| Household size        | <6 members   | 692                    | 585            | 54.22         | 0.0001  |
|                       | ≥6 members   | 400                    | 507            |               |         |
| Ever had a child loss | No           | 938                    | 876            | 28.21         | 0.0001  |
|                       | Yes          | 154                    | 216            |               |         |
| Women age             | <20 years    | 49                     | 57             | 11.48         | 0.0032  |

|  |                 |                    |      |      |        |        |
|--|-----------------|--------------------|------|------|--------|--------|
|  |                 | 20-34 years        | 845  | 802  |        |        |
|  |                 | ≥35 years          | 198  | 233  |        |        |
|  | Birth interval  | ≥36 months         | 477  | 442  | 8.49   | 0.0036 |
|  |                 | <36 months         | 305  | 340  |        |        |
|  | PNC             | No                 | 881  | 909  | 6.82   | 0.0090 |
|  |                 | Yes                | 211  | 183  |        |        |
|  | Marital status  | Currently in union | 1030 | 1029 | 4.53   | 0.1039 |
|  |                 | Formerly in union  | 54   | 59   |        |        |
|  |                 | Never in union     | 8    | 4    |        |        |
|  | Household head  | Female             | 156  | 140  | 2.68   | 0.1018 |
|  |                 | Male               | 936  | 952  |        |        |
|  | Community level | Low                | 739  | 569  | 136.88 | 0.0001 |
|  | poverty         | High               | 353  | 523  |        |        |
|  | Residence       | Urban              | 445  | 310  | 105.30 | 0.0001 |
|  |                 | Rural              | 647  | 782  |        |        |
|  | Community ANC   | High               | 717  | 606  | 58.21  | 0.0001 |
|  | utilization     | Low                | 375  | 486  |        |        |
|  | Community       | High               | 695  | 645  | 12.27  | 0.0005 |
|  | women education | Low                | 397  | 447  |        |        |

### Random effects and model comparison

As the multilevel mixed-effects Weibull survival regression analysis results described in Table 3, Model I revealed statistically significant variation in the survival time to first ANC visit of women across communities. Nearly One fifth of the variation in the survival time is attributed to community-level factors (ICC = 18.9%). After adjusting the model for individual-level factors (Model II), about 32.2% of the variation in the accelerations of survival time was attributed to the individual level factors (PCV = 32.2%), and 13.7% of the variance in the survival time was attributed to community-level factors (ICC = 13.7%). Model III, which was adjusted for community-level factors, revealed that the community level factors explained 4.5% of the

variability in the accelerations of survival time to first ANC visit of women (PCV = 4.5%), and 13.1% of the variation among the clusters was attributed to community-level factors (ICC = 13.1%)Table 3.

The final best-fit model (model IV) was adjusted for both individual and community-level factors simultaneously. In this final model (model IV), as indicated by the PCV, 10.5% of the variation in the survival time across communities was explained by both individual and community-level factors. Including both individual- and community-level factors reduced the unexplained heterogeneity in the time to first ANC visit between communities from MAF of 2.70 2.31 in the null model to the MAF of 2.50 1.89 in the final model, which equals 0.42. This showed that the survival time to first ANC visit reduced by 58% when a woman moved from high risk to low-risk neighborhoods Table 3.

**Table 3 Measures of variation and model fit statistics for time to first ANC visit among women in Ethiopia, 2023**

|                             | Null model | Model II  | Model III  | Model IV   |
|-----------------------------|------------|-----------|------------|------------|
| <b>Random effect result</b> |            |           |            |            |
| Variance                    | 0.7686926  | 0.5209301 | 0.4975675  | 0.4451822  |
| ICC (%)                     | 18.9       | 13.7      | 13.1       | 11.9       |
| PCV (%)                     | Reference  | 32.2      | 4.5        | 10.5       |
| MHR                         | 2.31       | 1.99      | 1.96       | 1.89       |
| <b>Model fit statistics</b> |            |           |            |            |
| -Log likelihood             | -2552.5567 | -2086.979 | -2494.9995 | -2011.4754 |
| AIC                         | 5111.113   | 4203.958  | 5019.999   | 4076.951   |
| DIC                         | 5105.1134  | 4173.958  | 4989.999   | 4022.9508  |

1  
2  
3 Based on the AIC and DIC, Multilevel mixed-effects Weibull survival model (Model IV) was  
4 found the best model to fit the data with a minimum AIC and DIC values of 4076.951 and  
5  
6 4022.951, respectively Supplementary Table 1.  
7  
8

9  
10 The survival plot in **Error! Reference source not found.** shows that the survivor function for  
11 rural women is above the survivor function for urban women. This implies that rural women  
12 have a greater probability of not initiating an ANC visit at earlier gestational age (Figure 1  
13  
14 Mixed-effects AFT Weibull regression of time to first ANC visit by place of residence).  
15  
16  
17

18  
19  
20 **(Figure 1 Mixed-effects AFT Weibull regression of time to first ANC visit by place of**  
21 **residence)**  
22

### 23 **Interpretation of the multilevel Weibull model results**

24  
25 The results of multivariable multilevel parametric Weibull survival analysis of predictors of the  
26 survival time to first ANC visit is provided in Table 4. The acceleration factor for mothers who  
27 gave birth in Home compared to those delivered in Health facility was 1.34 (95% CI: 1.20, 1.49).  
28  
29 This shows that Home delivered mothers have a 34% longer survival time to start a first ANC  
30 visit. Similarly, Grand multiparous women have a 19% longer time to start ANC early in the first  
31 trimester than primipara women. The acceleration factor for Grand multiparous women was 1.19  
32  
33 (95% CI: 1.02, 1.39).  
34  
35  
36  
37  
38  
39  
40  
41

42  
43 Media access was found to be a significant predictor of the survival time to first ANC visit. The  
44 acceleration factor for women who have access to media was 0.90 (95% CI: 0.81, 0.99). This  
45 shows that women who have media access had a 10% shorter time to start ANC in the first  
46 trimester of pregnancy than women who have no media access. Similarly, women whose last  
47 birth was caesarean section had a 28% shorter time to initiate ANC early in the first trimester as  
48 compared to those who delivered vaginally (AFT=0.72, 95% CI: 0.63, 0.82) Table 4.  
49  
50  
51  
52  
53  
54  
55  
56  
57  
58  
59  
60

Women with higher education had a 29% shortened time to start first ANC visit than those who were not educated. The acceleration factor for women with higher education was 0.71 (95% CI: 0.59, 0.85). Moreover, those with primary education had an 11% shortened time to commence ANC visit early in the first trimester of pregnancy (AFT=0.89, 95% CI: 0.80, 0.98). The acceleration factor for mothers who were formerly in union was 1.43 (95% CI: 1.14, 1.78). This indicates that mothers who were formerly in union commenced ANC visit later than mothers who were currently in union at 5% level of significance Table 4.

Place of residence was found to be a significant predictor of the survival time to first ANC visit. The acceleration factor for women who were rural residents was 1.20 (95% CI: 1.01, 1.43). This shows that women from a rural residency had 1.20 times prolonged time to start their first ANC visit early in pregnancy relative to those who were from an urban residency. Administrative region was also a significant predictor of time to first ANC visit Table 4.

**Table 4 Mixed-effects Weibull AFT survival regression of time to first ANC visit among women in Ethiopia, 2023**

| Variables                  | Null Model | Model II            | Model III | Model IV            |
|----------------------------|------------|---------------------|-----------|---------------------|
| <b>Place of last birth</b> |            |                     |           |                     |
| Facility                   |            | 1                   |           | 1                   |
| Home                       |            | 1.36(1.22, 1.51)*** |           | 1.34(1.20, 1.49)*** |
| <b>Parity</b>              |            |                     |           |                     |
| 1                          |            | 1                   |           | 1                   |
| Multipara                  |            | 1.05(0.95, 1.17)    |           | 1.06(0.96, 1.18)    |
| Grand multipara            |            | 1.23(1.06, 1.43)**  |           | 1.19(1.02, 1.39)*   |
| <b>Media Access</b>        |            |                     |           |                     |
| No                         |            | 1                   |           | 1                   |
| Yes                        |            | 0.82(0.75, 0.90)*** |           | 0.90(0.81, 0.99)*   |

|    |                          |                     |                     |
|----|--------------------------|---------------------|---------------------|
| 1  |                          |                     |                     |
| 2  |                          |                     |                     |
| 3  | <b>Last birth</b>        |                     |                     |
| 4  |                          |                     |                     |
| 5  | Vaginal                  | 1                   | 1                   |
| 6  | C/S                      | 0.71(0.62, 0.82)*** | 0.72(0.63, 0.82)*** |
| 7  |                          |                     |                     |
| 8  | <b>Mothers education</b> |                     |                     |
| 9  |                          |                     |                     |
| 10 | No education             | 1                   | 1                   |
| 11 | Primary                  | 0.90(0.81, 0.99)*   | 0.89(0.80, 0.98)*   |
| 12 | Secondary                | 1.04(0.89, 1.21)    | 1.01(0.87, 1.18)    |
| 13 | Higher                   | 0.68(0.57, 0.81)*** | 0.71(0.59, 0.85)*** |
| 14 |                          |                     |                     |
| 15 |                          |                     |                     |
| 16 |                          |                     |                     |
| 17 | <b>Marital status</b>    |                     |                     |
| 18 |                          |                     |                     |
| 19 | Currently in union       | 1                   | 1                   |
| 20 | Formerly in union        | 1.42(1.13, 1.77)**  | 1.43(1.14, 1.78)**  |
| 21 | Never in union           | 1.03(0.65, 1.65)    | 1.05(0.66, 1.68)    |
| 22 |                          |                     |                     |
| 23 |                          |                     |                     |
| 24 | <b>Maternal age</b>      |                     |                     |
| 25 |                          |                     |                     |
| 26 | Below 20 years           | 1                   | 1                   |
| 27 | 20-34 years              | 0.90(0.74, 1.08)    | 0.87(0.72, 1.07)    |
| 28 | 35 or more years         | 1.10(0.90, 1.34)    | 1.08(0.85, 1.37)    |
| 29 |                          |                     |                     |
| 30 |                          |                     |                     |
| 31 | <b>Community ANC</b>     |                     |                     |
| 32 |                          |                     |                     |
| 33 | Low                      | 1                   | 1                   |
| 34 | High                     | 0.75(0.66, 0.84)*** | 0.92(0.78, 1.07)    |
| 35 |                          |                     |                     |
| 36 | <b>Residency</b>         |                     |                     |
| 37 |                          |                     |                     |
| 38 | Urban                    | 1                   | 1                   |
| 39 | Rural                    | 1.33(1.18, 1.50)*** | 1.20(1.01, 1.43)*   |
| 40 |                          |                     |                     |
| 41 | <b>Region</b>            |                     |                     |
| 42 |                          |                     |                     |
| 43 | Addis Ababa              | 1                   | 1                   |
| 44 | Tigray                   | 1.24(0.94, 1.64)    | 1.06(0.80, 1.43)    |
| 45 | Afar                     | 1.13(0.68, 1.90)    | 0.92(0.61, 1.41)    |
| 46 | Amhara                   | 1.27(0.99, 1.62)    | 0.96(0.73, 1.26)    |
| 47 | Oromia                   | 1.45(1.14, 1.84)**  | 1.13(0.86, 1.48)    |
| 48 | Somalia                  | 1.51(1.03, 2.22)*   | 1.14(0.76, 1.70)    |
| 49 | Benishangul              | 1.37(0.82, 2.29)    | 1.18(0.77, 1.83)    |
| 50 | SNNPR                    | 1.66(1.29, 2.14)*** | 1.50(1.18, 2.01)**  |
| 51 |                          |                     |                     |
| 52 |                          |                     |                     |
| 53 |                          |                     |                     |
| 54 |                          |                     |                     |
| 55 |                          |                     |                     |
| 56 |                          |                     |                     |
| 57 |                          |                     |                     |
| 58 |                          |                     |                     |
| 59 |                          |                     |                     |
| 60 |                          |                     |                     |

|           |                  |                  |
|-----------|------------------|------------------|
| Gambella  | 1.36(0.64, 2.90) | 1.32(0.71, 2.46) |
| Harari    | 0.83(0.36, 1.89) | 0.83(0.46, 1.48) |
| Dire Dawa | 0.89(0.50, 1.60) | 0.83(0.54, 1.28) |

\* Statistically significant at P-value < 0.05; \*\* statistically significant at P-value  $p < 0.01$ ; \*\*\* statistically significant at P-value < 0.001, 1 = Reference category

## Discussion

Timely initiation of ANC visit in Ethiopia was found to be 42.7% (95% CI: 41.0 – 44.6). This result is higher than the previous study conducted in Ethiopia that reported timely initiation of ANC visit of 38.6%(34). This finding is significantly higher than studies done in Benin, Kenya, and Nigeria(35)(36)(37), but lower compared to a study from Ghana, where first trimester initiation of ANC visit was reported to be as high as 57%(27).

The mean survival time of pregnant women to initiate the first ANC visit was 6.8 months. This finding was slightly higher than a study done in Nigeria in which the reported median survival time to first ANC visit was 6 months(37). This finding is higher when compared to the recent findings of average of 3.4 gestational months before initiation of ANC visit in Ghana(27). However, late initiation of ANC visit has been previously reported in Ethiopia with a median survival time of 7 months(34).

Women who had higher education, and who had primary education had a 29%, and 11% shortened time to start first ANC visit than those with no education. This finding is in agreement with findings of previous studies(38)(9). A retrospective study from Ethiopia revealed that early initiation of ANC increases as the women's level of education increases compared to women who have no formal education(9). A multi-country analysis of DHS in SSA found that the odd of timely initiation of ANC was higher in mothers who had higher level of education compared to



1  
2  
3 women who had no formal education(8).A study from Nigeria revealed that women with higher  
4 education were more likely to start first ANC visit early compared to uneducated women(37).  
5  
6 Similarly, in Nepal, women with higher level education were significantly more likely to initiate  
7  
8 ANC early compared to women who had no education(38).  
9  
10

11  
12  
13 The possible explanation could be due to women with a secondary and above level of education  
14 might be more likely to be employed, financially independent, and knowledgeable on the  
15 necessity of having antenatal care follow-up during pregnancy, as a result, they might be more  
16 likely to realize the importance of early booking their first ANC visit timely(39).Additionally,  
17 uneducated women might have limited understanding of ANC services and their importance to  
18 their unborn fetus wellbeing and ensure safe delivery(9). It is because education will change the  
19 knowledge when to start ANC awareness of the mothers to start and follow the health services  
20 appropriately (16).  
21  
22  
23  
24  
25  
26  
27  
28  
29  
30

31  
32 This study indicated that women who were formerly in union commenced ANC visit later than  
33 mothers who were currently in union at 5% level of significance. This evidence is in line with the  
34 studies done in South Africa and Rwanda in which currently married women were more likely to  
35 initiate ANC in the first trimester of pregnancy(24)(26). This might be due to the fear of social  
36 rumors, and hence, lack of confidence in seeking care for unborn child whose father is not formal  
37 or in doubt. Another possible explanation can be the work load hanged on her shoulder only to  
38 improve the life of her unborn child and herself too. Furthermore, they might not know whether  
39 they are pregnant timely, and even if they knew it early, they may not be interested with the  
40 pregnancy, they may be careless for the conception and fail to book early.  
41  
42  
43  
44  
45  
46  
47  
48  
49  
50  
51  
52  
53  
54  
55  
56  
57  
58  
59  
60

1  
2  
3 The findings of this study indicate that having the father of the child present in the woman's life  
4 during pregnancy shortens the time to first ANC attendance and highlight a need to involve male  
5 partners in reproductive health issues including family planning and maternal health care.  
6  
7

8  
9  
10 Grand multiparous women had a 19% longer time to start ANC early in the first trimester than  
11 primipara women. In Nigeria, women with one birth were 1.90 times more likely to initiate ANC  
12 in the first trimester compared to women with five and above births(20). In Malawi, women with  
13 more than five births were 12% less likely to access ANC services in their first trimester of  
14 pregnancy(40). A population study from Ethiopia showed that multi-parous women had higher  
15 odds of delayed initiation of ANC visit when compared to the primi-parous women(23). Another  
16 survival study from Ethiopia found that women with four and above births had a 20% hazard of  
17 delayed initiation of ANC follow up as compared to one parity(9).  
18  
19  
20  
21  
22  
23  
24  
25  
26  
27  
28  
29

30 This might be attributable to high parity women's increased confidence from previous pregnancy  
31 and childbirth experience. Additionally, high parity women might have poor prior experience  
32 with the health system, and constraints of time and resources to access ANC services early(36).  
33  
34  
35  
36  
37

38 This study also showed that women from a rural residency had a prolonged time to start their  
39 first ANC visit relative to those who were from an urban residency. In SSA, women residing in  
40 the rural area were less likely to initiate ANC timely within 12 weeks of gestation(8).In Nigeria,  
41 women in urban areas were more likely to make the first ANC visit early in the first trimester of  
42 pregnancy(37).A study in Ethiopia using the 2016 EDHS data set indicated that rural women  
43 have prolonged time-to start first ANC visit than urban women(19). In Ethiopia, women from  
44 rural residency were 18% less likely to attained ANC early in pregnancy than urban counter  
45  
46  
47  
48  
49  
50  
51  
52  
53  
54  
55  
56  
57  
58  
59  
60

1  
2  
3 parts(9). Another similar study in Ethiopia showed that rural women were 59% less likely to start  
4 their first ANC visit within the first trimester than urban counterparts(10).  
5  
6  
7

8  
9 This study showed that women whose last birth was in Home had a 34% longer survival time to  
10 start a first ANC visit compared to those whose last birth was in Health facility. This result is  
11 supported with the finding reported from Mandera County in Kenya in which women who  
12 utilized skilled delivery service were more likely to have used ANC services more than those  
13 who had not utilized the service(36).  
14  
15  
16  
17  
18  
19

20  
21 Media access was found to be a significant predictor of the survival time to first ANC visit.  
22  
23 Women who have media access had a 10% shorter time to start ANC in the first trimester of  
24 pregnancy than women who have no media access. This is similar to findings in(19)(9),  
25 suggesting that women who have access to media were more likely to initiate ANC at an earlier  
26 gestational age. Access to media is associated with increased knowledge about the benefit of  
27 using maternal health services which compels women to better use antenatal care services.  
28  
29  
30  
31  
32  
33  
34

35  
36 Women whose last birth was caesarean section had a 28% shorter time to start first ANC than  
37 those who gave their last birth vaginally. This finding is supported with previous similar  
38 studies(41)(36)(42). A previous study done in Uganda showed that women who gave birth by  
39 caesarean section were more likely to initiate the first ANC visit in the first trimester of  
40 pregnancy(41). In Kenya, women who had complications during last pregnancy were two times  
41 more likely to utilize ANC than those who had no complication(36). A study from Mekelle,  
42 Ethiopia revealed that women with history of still birth, and obstetric problem in the current  
43 pregnancy were more likely to book ANC early in pregnancy(42).  
44  
45  
46  
47  
48  
49  
50  
51  
52  
53  
54  
55  
56  
57  
58  
59  
60

## Study limitations and strengths

This study used secondary data that were collected cross-sectionally through self-reported interviews, which are prone to recall errors and social desirability bias. In addition, some factors that are probably crucial in determining the timing of the first ANC visit were not available for consideration in the existing EMDHS data, such as the standard of ANC provided and women's perceptions of the ANC. Despite these drawbacks, the current study used a large sample from nationally representative survey data in Ethiopia. The study's findings were representative of all regions. The study also attempted to analyze community-level variables related to the survival time to first ANC visit. Another advantage of the study is its sophisticated statistical design, which allows for greater reliability of the results and allows for the control of confounding factors.

## Conclusion

The study indicated that women in the study area sought their initial antenatal care at a health facility far later than the WHO recommended. The independent predictors, women's education level, media exposure, and prior cesarean delivery made early ANC initiation possible. Increasing parity, being previously in a union, having a home birth, and living in a rural area were the impediments for early ANC initiation.

It's crucial to provide health education with a focus on empowering expectant mothers to timely activate prenatal care, especially for those who give birth at home and for those who reside in remote areas. To do this, healthcare practitioners should work in conjunction with community health workers. Expanding health education through the use of media should also be a part of initiatives to boost the timely initiation of antenatal care utilization.

1  
2  
3 This study also has the implication that policies aiming to decrease pregnancy-related  
4 preventable morbidity and mortality through the use of timely antenatal care must prioritize  
5 educating and empowering women.  
6  
7  
8  
9

## 10 11 12 **Abbreviations and Acronyms**

13  
14 AAF: Adjusted Acceleration Factor; AFT: Accelerated Failure Time; ANC: Antenatal Care; CI:  
15 Confidence Interval; DHS: Demographic and Health Survey; EMDHS: Ethiopian Mini  
16 Demographic and Health Survey; ICC: Intraclass Correlation Coefficient; MAF: Median  
17 Acceleration Factor; PCV: Proportional Change in Variance; PNC: Postnatal Care.  
18  
19  
20  
21  
22  
23  
24  
25

## 26 **Declarations**

### 27 28 29 **Ethics approval and consent to participate**

30  
31  
32 Ethics review and participant consent were not required for this study because it used secondary  
33 data analysis of publicly available survey data from the Measure DHS program. A written letter  
34 of permission was secured from the IRB of Demographic and Health Survey (DHS) program  
35 data archivists to download and use the data for this study from <https://www.dhsprogram.com>.  
36  
37  
38  
39  
40  
41 This study was performed in line with the principles of the Declaration of Helsinki. The DHS  
42 data were kept confidential, and any identifying information was removed. The data was only  
43 used for this particular, authorized research project, and it would not be shared with  
44  
45  
46  
47  
48  
49  
50  
51  
52  
53  
54  
55  
56  
57  
58  
59  
60

### **Consent for publication**

Not applicable

### Availability of data and materials

The data sets recoded and analyzed during this study are available in the Measure DHS program repository to all registered users ([https://www.dhsprogram.com/data/dataset\\_admin](https://www.dhsprogram.com/data/dataset_admin))

### Competing interests

The authors declare that they have no competing interests.

### Funding

There was no funding for this research.

### Author's contributions

HZA conceived the study, participated in its design and coordination, initiated the research, carried out the statistical analysis, interpreted the results, and wrote the final manuscript, critically reviewing it. BTO and MA participated in the study's design, guided the statistical analysis, and critically reviewed the manuscript. DG, HI and TG were involved in principal supervision, participated in the study's design and coordination, edited the manuscript, and critically reviewed the manuscript. The authors have read and approved the final manuscript.

### Acknowledgment

The authors would like to thank the MEASURE DHS Project for their free access to the original data of the 2019 Mini Demographic and Health Survey of Ethiopia.

## References

1. Tolossa T, Turi E, Fetensa G, Fekadu G, Kebede F. Association between pregnancy intention and late initiation of antenatal care among pregnant women in Ethiopia: A systematic review and meta-analysis. *Syst Rev*. 2020;9(1):1–10.
2. World Health Organization. WHO recommendations on antenatal care for a positive pregnancy experience. World Health Organization. 2016.
3. Berhan Y, Berhan A. Antenatal care as a means of increasing birth in the health facility and reducing maternal mortality: a systematic review. *Ethiop J Health Sci*. 2014;24(6):93–104.
4. Moller AB, Petzold M, Chou D, Say L. Early antenatal care visit: a systematic analysis of regional and global levels and trends of coverage from 1990 to 2013. *Lancet Glob Heal* [Internet]. 2017;5(10):e977–83. Available from: [http://dx.doi.org/10.1016/S2214-109X\(17\)30325-X](http://dx.doi.org/10.1016/S2214-109X(17)30325-X)
5. Jiwani SS, Amouzou A, Carvajal-Aguirre L, Chou D, Keita Y, Moran AC, et al. Timing and number of antenatal care contacts in low-and middle-income countries: Analysis in the Countdown to 2030 priority countries. *J Glob Health*. 2020;10(1).
6. WHO, UNICEF UNFPA, WORLD BANK GROUP and UNDESA/Population Division. Trends in maternal mortality 2000 to 2020: estimates [Internet]. WHO, Geneva. 2023. Available from: <https://www.who.int/reproductivehealth/publications/maternal-mortality-2000-2017/en/>
7. Makate M, Makate C. *Journal of Epidemiology and Global Health* Prenatal care utilization

- 1  
2  
3 in Zimbabwe : Examining the role of community-level factors. *J Epidemiol Glob Health*  
4 [Internet]. 2017;7(4):255–62. Available from: <https://doi.org/10.1016/j.jegh.2017.08.005>  
5  
6  
7
- 8 8. Alem A, Yeshaw Y, Liyew A, Tesema G, Alamneh T, Worku M, et al. Timely initiation  
9 of antenatal care and its associated factors among pregnant women in sub-Saharan Africa :  
10 A multicountry analysis of Demographic and Health Surveys. 2022;1–17.  
11  
12  
13  
14  
15
- 16 9. Dewau R, Muche A, Fentaw Z, Yalew M, Bitew G, Amsalu E. Time to initiation of  
17 antenatal care and its predictors among pregnant women in Ethiopia : Cox-gamma shared  
18 frailty model. 2021;13:1–18.  
19  
20  
21  
22  
23
- 24 10. Woldeamanuel BT, Belachew TA. Timing of first antenatal care visits and number of  
25 items of antenatal care contents received and associated factors in Ethiopia: multilevel  
26 mixed effects analysis. *Reprod Health* [Internet]. 2021;18(1):1–16. Available from:  
27 <https://doi.org/10.1186/s12978-021-01275-9>  
28  
29  
30  
31  
32  
33
- 34 11. Alemu Y, Aragaw A. Early initiations of first antenatal care visit and associated factor  
35 among mothers who gave birth in the last six months preceding birth in Bahir Dar Zuria  
36 Woreda North West Ethiopia. *Reprod Health*. 2018;15(1):1–8.  
37  
38  
39  
40  
41
- 42 12. Geta MB, Yallew WW. Early Initiation of Antenatal Care and Factors Associated with  
43 Early Antenatal Care Initiation at Health Facilities in Southern Ethiopia. *Adv Public Heal*.  
44 2017;2017:1–6.  
45  
46  
47  
48  
49
- 50 13. Wolde F, Mulaw Z, Zena T, Biadgo B, Limenih MA. Determinants of late initiation for  
51 antenatal care follow up: The case of northern Ethiopian pregnant women. *BMC Res*  
52 *Notes* [Internet]. 2018;11(1):1–7. Available from: <https://doi.org/10.1186/s13104-018->  
53  
54  
55  
56  
57  
58  
59  
60



- 1  
2  
3 3938-9  
4  
5  
6  
7 14. Weldemariam S, Damte A, Endris K, Palcon MC, Tesfay K, Berhe A, et al. Late antenatal  
8 care initiation: The case of public health centers in Ethiopia. BMC Res Notes [Internet].  
9 2018;11(1):1–6. Available from: <https://doi.org/10.1186/s13104-018-3653-6>  
10  
11  
12  
13  
14 15. Gebresilassie B, Belete T, Tilahun W, Berhane B, Gebresilassie S. Timing of first  
15 antenatal care attendance and associated factors among pregnant women in public health  
16 institutions of Axum town, Tigray, Ethiopia, 2017: A mixed design study. BMC  
17 Pregnancy Childbirth. 2019;19(1):1–11.  
18  
19  
20  
21  
22  
23  
24 16. Tola W, Negash E, Sileshi T, Wakgari N. Late initiation of antenatal care and associated  
25 factors among pregnant women attending antenatal clinic of Ilu Ababor Zone, southwest  
26 Ethiopia: A cross-sectional study. PLoS One [Internet]. 2021;16(1 January):1–11.  
27 Available from: <http://dx.doi.org/10.1371/journal.pone.0246230>  
28  
29  
30  
31  
32  
33  
34 17. Tesfaye M, Dessie Y, Demena M, Yosef T. Late antenatal care initiation and its  
35 contributors among pregnant women at selected public health institutions in Southwest  
36 Ethiopia. Pan Afr Med J. 2021;39.  
37  
38  
39  
40  
41  
42 18. Alem AZ, Yeshaw Y, Liyew AM, Tesema GA, Alamneh TS, Worku MG, et al. Timely  
43 initiation of antenatal care and its associated factors among pregnant women in sub-  
44 Saharan Africa: A multicountry analysis of Demographic and Health Surveys. PLoS One  
45 [Internet]. 2022;17(1 January):1–17. Available from:  
46  
47 <http://dx.doi.org/10.1371/journal.pone.0262411>  
48  
49  
50  
51  
52  
53  
54 19. Fentaw KD, Fenta SM, Biresaw HB, Mulugeta SS. Time to first antenatal care visit  
55  
56  
57  
58  
59  
60

- 1  
2  
3 among pregnant women in Ethiopia: secondary analysis of EDHS 2016; application of  
4 AFT shared frailty models. *Arch Public Heal.* 2021;79(1):1–14.  
5  
6  
7  
8  
9 20. Fagbamigbe AF, Olaseinde O, Fagbamigbe OS. Timing of first antenatal care contact, its  
10 associated factors and state-level analysis in Nigeria: a cross-sectional assessment of  
11 compliance with the WHO guidelines. *BMJ Open.* 2021;11(9):e047835.  
12  
13  
14  
15  
16 21. Dewau R, Muche A, Fentaw Z, Yalew M, Bitew G, Amsalu ET, et al. Time to initiation of  
17 antenatal care and its predictors among pregnant women in Ethiopia: Cox-gamma shared  
18 frailty model. *PLoS One [Internet].* 2021;16(2 February):1–18. Available from:  
19 <http://dx.doi.org/10.1371/journal.pone.0246349>  
20  
21  
22  
23  
24  
25  
26 22. Agaba P, Magadi M, Onukwugha F, Misinde C. Factors associated with the timing and  
27 number of antenatal care visits among unmarried compared to married youth in uganda  
28 between 2006 and 2016. *Soc Sci.* 2021;10(12).  
29  
30  
31  
32  
33  
34 23. Yaya S, Bishwajit G, Ekholuenetale M, Shah V, Kadio B, Udenigwe O. Timing and  
35 adequate attendance of antenatal care visits among women in Ethiopia. *PLoS One.*  
36 2017;12(9):1–16.  
37  
38  
39  
40  
41  
42 24. Muhwava LS, Morojele N, London L. Psychosocial factors associated with early initiation  
43 and frequency of antenatal care (ANC) visits in a rural and urban setting in South Africa:  
44 A cross-sectional survey. *BMC Pregnancy Childbirth [Internet].* 2016;16(1):1–9.  
45 Available from: <http://dx.doi.org/10.1186/s12884-016-0807-1>  
46  
47  
48  
49  
50  
51  
52 25. Gross K, Alba S, Glass TR, Schellenberg JA, Obrist B. Timing of antenatal care for  
53 adolescent and adult pregnant women in south-eastern Tanzania. *BMC Pregnancy*  
54  
55  
56  
57  
58  
59  
60

- 1  
2  
3 Childbirth. 2012;12.  
4  
5  
6  
7 26. Munyaneza F, Mujawase F, Banamwana L, Sayinzoga F, Thomson DR, Ntaganira J, et al.  
8  
9 Assessing predictors of delayed antenatal care visits in Rwanda : a secondary analysis of  
10  
11 Rwanda demographic and health survey 2010. *BMC Pregnancy Childbirth*.  
12  
13 2016;14(290):1–8.  
14  
15  
16  
17 27. Manyeh AK, Amu A, Williams J, Gyapong M. Factors associated with the timing of  
18  
19 antenatal clinic attendance among first-time mothers in rural southern Ghana. *BMC*  
20  
21 *Pregnancy Childbirth*. 2020;20(1):1–7.  
22  
23  
24  
25 28. Department of Economic and Social Affairs PD. *World Population Prospects 2022*  
26  
27 [Internet]. United Nation. 2022. 1–54 p. Available from: [www.un.org/development/](http://www.un.org/development/desa/pd/)  
28  
29 [desa/pd/](http://www.un.org/development/desa/pd/).  
30  
31  
32 29. World Bank. Ethiopia-GNI-per-capita [Internet]. [cited 2023 Apr 6]. Available from:  
33  
34 <https://www.macrotrends.net/countries/ETH/ethiopia/gni-per-capita>  
35  
36  
37  
38 30. EPHI and ICF. *Ethiopia Mini Demographic and Health Survey 2019*. Addis Ababa,  
39  
40 Ethiopia, and Rockville, Maryland, USA; 2019.  
41  
42  
43 31. Kleinbaum DG, Klein M. *Survival Analysis: A Self-Learning Text*. Third Edit. Springer;  
44  
45 2013. 292–318 p.  
46  
47  
48  
49 32. Crowther MJ. Multilevel mixed-effects parametric survival analysis: Estimation,  
50  
51 simulation, and application. *Stata J*. 2019;19(4):931–49.  
52  
53  
54 33. Austin PC, Stryhn H, Leckie G, Merlo J. Measures of clustering and heterogeneity in  
55  
56 multilevel Poisson regression analyses of rates/count data. *Stat Med*. 2018;37(4):572–89.  
57  
58  
59  
60

- 1  
2  
3 34. Seid A, Ahmed M. Survival time to first antenatal care visit and its predictors among  
4 women in Ethiopia. *PLoS One*. 2021;1–5.  
5  
6  
7  
8  
9 35. Edgard-Marius O, Charles SJ, Jacques S, Justine GC-C, Virginie MA, Ibrahim MA, et al.  
10 Determinants of Low Antenatal Care Services Utilization during the First Trimester of  
11 Pregnancy in Southern Benin Rural Setting. *Univers J Public Heal*. 2015;3(5):220–8.  
12  
13  
14  
15  
16 36. Adow I, Mwanzo I, Agina O, Wanzala P, Kariuki J. Uptake of antenatal care services  
17 among women of reproductive age in Mandera County, Kenya. *Afr J Health Sci [Internet]*.  
18 2020;33(1):56–69. Available from:  
19 [https://indexmedicus.afro.who.int/AIM/opac\\_css/doc\\_num.php?explnum\\_id=73592](https://indexmedicus.afro.who.int/AIM/opac_css/doc_num.php?explnum_id=73592)  
20  
21  
22  
23  
24  
25  
26 37. Fagbamigbe AF, Abel C, Mashabe B, Adebowale AS. Survival analysis and prognostic  
27 factors of the timing of first antenatal care visit in Nigeria. *Adv Integr Med [Internet]*.  
28 2019;6(3):110–9. Available from: <https://doi.org/10.1016/j.aimed.2018.12.002>  
29  
30  
31  
32  
33  
34 38. Gilles MT. Timing of First Antenatal Care ( ANC ) and Inequalities in Early Initiation of  
35 ANC in Nepal. 2017;5(September):1–6.  
36  
37  
38  
39 39. Tesfu A., Aweke A., Gela G., Wudineh K., Beyene F. Factors associated with timely  
40 initiation of antenatal care among pregnant women in Bahir Dar city , Northwest  
41 Ethiopia : sectional study. 2022;(December 2021):1210–7.  
42  
43  
44  
45  
46  
47 40. Kuuire VZ, Kangmennaang J, Atuoye KN, Antabe R, Boamah SA, Vercillo S, et al.  
48 Timing and utilisation of antenatal care service in Nigeria and Malawi. *Glob Public*  
49 *Health*. 2017;12(6):711–27.  
50  
51  
52  
53  
54  
55 41. Bbaale E. Factors influencing timing and frequency of antenatal care in Uganda. *Australas*  
56  
57  
58  
59  
60

1  
2  
3 Med J. 2011;4(8):431–8.  
4  
5

- 6 42. Fisseha G. Predictors of Timing of First Antenatal Care Booking at Public Health Centers  
7  
8 in Mekelle City, Northern Ethiopia. J Gynecol Obstet. 2015;3(3):55.  
9  
10  
11  
12  
13  
14  
15  
16  
17  
18  
19  
20  
21  
22  
23  
24  
25  
26  
27  
28  
29  
30  
31  
32  
33  
34  
35  
36  
37  
38  
39  
40  
41  
42  
43  
44  
45  
46  
47  
48  
49  
50  
51  
52  
53  
54  
55  
56  
57  
58  
59  
60

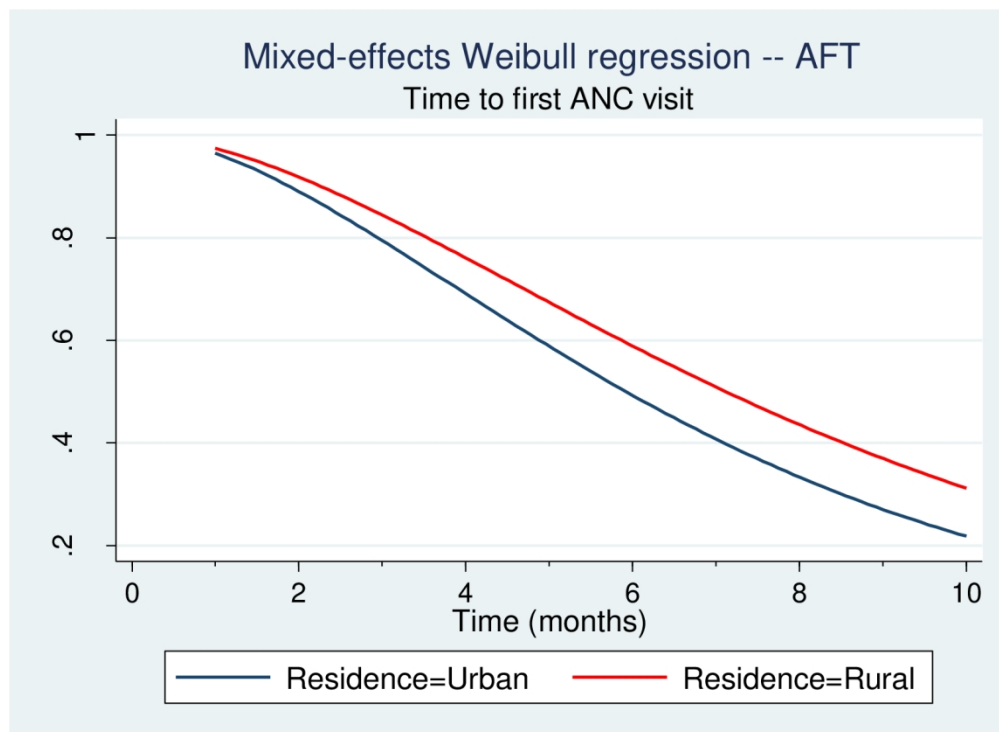

Figure 1 Mixed-effects AFT Weibull regression of time to first ANC visit by place of residence

139x101mm (300 x 300 DPI)

1  
2  
3  
4  
5  
6  
7  
8  
9  
10  
11  
12  
13  
14  
15  
16  
17  
18  
19  
20  
21  
22  
23  
24  
25  
26  
27  
28  
29  
30  
31  
32  
33  
34  
35  
36  
37  
38  
39  
40  
41  
42  
43  
44  
45  
46  
47  
48  
49  
50  
51  
52  
53  
54  
55  
56  
57  
58  
59  
60

**Supplementary Table 1 Comparison of Mixed-effects AFT model with different baseline distributions**

| Model        | Parameters | -Log Likelihood value (Full) | DIC value | AIC value | BIC      |
|--------------|------------|------------------------------|-----------|-----------|----------|
| Exponential  | 26         | -2991.507                    | 5983.014  | 6035.014  | 6186.615 |
| Weibull      | 27         | -2011.4754                   | 4022.951  | 4076.951  | 4234.383 |
| Log-normal   | 27         | -2769.9096                   | 5539.819  | 5593.819  | 5751.251 |
| Log-logistic | 27         | -2797.6489                   | 5595.298  | 5649.298  | 5806.73  |
| Gamma        | 27         | -2817.812                    | 5635.623  | 5689.623  | 5847.055 |

161x76mm (300 x 300 DPI)

# BMJ Open

## Time to initiation of antenatal care and its predictors among pregnant women in Ethiopia: Multilevel Mixed-effects Acceleration Failure Time model

|                                 |                                                                                                                                                                                                                                                                                                                                                                                                                                                                       |
|---------------------------------|-----------------------------------------------------------------------------------------------------------------------------------------------------------------------------------------------------------------------------------------------------------------------------------------------------------------------------------------------------------------------------------------------------------------------------------------------------------------------|
| Journal:                        | <i>BMJ Open</i>                                                                                                                                                                                                                                                                                                                                                                                                                                                       |
| Manuscript ID                   | bmjopen-2023-075965.R1                                                                                                                                                                                                                                                                                                                                                                                                                                                |
| Article Type:                   | Original research                                                                                                                                                                                                                                                                                                                                                                                                                                                     |
| Date Submitted by the Author:   | 04-Jan-2024                                                                                                                                                                                                                                                                                                                                                                                                                                                           |
| Complete List of Authors:       | Oyato, Befekadu; Salale University, Midwifery<br>Abasimel , Husen; Salale University, Midwifery<br>Tufa, Derara Girma; College of Health Sciences Salale University, Department of Public Health<br>Israel, Hana; Jimma University College of Public Health and Medical Sciences, Midwifery<br>Getachew, Tewodros; Hawassa University College of Medicine and Health Sciences<br>Awol, Mukemil; College of Health Sciences Salale University, Department of Midwifery |
| <b>Primary Subject Heading</b>: | Obstetrics and gynaecology                                                                                                                                                                                                                                                                                                                                                                                                                                            |
| Secondary Subject Heading:      | Obstetrics and gynaecology                                                                                                                                                                                                                                                                                                                                                                                                                                            |
| Keywords:                       | OBSTETRICS, CHEMOTHERAPY, CLINICAL PHYSIOLOGY, GYNAECOLOGY                                                                                                                                                                                                                                                                                                                                                                                                            |
|                                 |                                                                                                                                                                                                                                                                                                                                                                                                                                                                       |

SCHOLARONE™  
Manuscripts





I, the Submitting Author has the right to grant and does grant on behalf of all authors of the Work (as defined in the below author licence), an exclusive licence and/or a non-exclusive licence for contributions from authors who are: i) UK Crown employees; ii) where BMJ has agreed a CC-BY licence shall apply, and/or iii) in accordance with the terms applicable for US Federal Government officers or employees acting as part of their official duties; on a worldwide, perpetual, irrevocable, royalty-free basis to BMJ Publishing Group Ltd ("BMJ") its licensees and where the relevant Journal is co-owned by BMJ to the co-owners of the Journal, to publish the Work in this journal and any other BMJ products and to exploit all rights, as set out in our [licence](#).

The Submitting Author accepts and understands that any supply made under these terms is made by BMJ to the Submitting Author unless you are acting as an employee on behalf of your employer or a postgraduate student of an affiliated institution which is paying any applicable article publishing charge ("APC") for Open Access articles. Where the Submitting Author wishes to make the Work available on an Open Access basis (and intends to pay the relevant APC), the terms of reuse of such Open Access shall be governed by a Creative Commons licence – details of these licences and which [Creative Commons](#) licence will apply to this Work are set out in our licence referred to above.

Other than as permitted in any relevant BMJ Author's Self Archiving Policies, I confirm this Work has not been accepted for publication elsewhere, is not being considered for publication elsewhere and does not duplicate material already published. I confirm all authors consent to publication of this Work and authorise the granting of this licence.

1  
2  
3 **Time to initiation of antenatal care and its predictors among pregnant women**  
4 **in Ethiopia: Multilevel Mixed-effects Acceleration Failure Time model**  
5  
6

7 Befekadu Tesfaye **Oyato**<sup>1</sup>, Husen Zakir **Abasimel**<sup>1\*</sup>, Derara Girma **Tufa**<sup>2</sup>, Hana **Israel**<sup>3</sup>,  
8 Tewodros **Getachew**<sup>4</sup>, Mukemil **Awol**<sup>1</sup>  
9

10 <sup>1</sup>Department of Midwifery, College of Health Sciences, Salale University, Fitcha, Ethiopia

11 <sup>2</sup>Department of Public health, College of Health Sciences, Salale University, Fitcha, Ethiopia

12 <sup>3</sup>Department of Midwifery, Institute of Health Sciences, Jimma University, Jimma, Ethiopia

13 <sup>4</sup>Department of Midwifery, College of Health Sciences, Hawassa University, Hawassa, Ethiopia  
14  
15  
16  
17  
18

19 Corresponding Authors: Husen Zakir **Abasimel** (HZA)

20 E-mail: [husniselam@gmail.com](mailto:husniselam@gmail.com)  
21  
22  
23  
24  
25  
26  
27  
28  
29  
30  
31  
32  
33  
34  
35  
36  
37  
38  
39  
40  
41  
42  
43  
44  
45  
46  
47  
48  
49  
50  
51  
52  
53  
54  
55  
56  
57  
58  
59  
60

## Abstract

**Objective:** To assess the time-to-initiation of antenatal care and its predictors among pregnant women in Ethiopia.

**Design:** Retrospective follow-up study using secondary data from the 2019 Ethiopian mini demographic and health survey.

**Setting and participants:** 2933 women aged 15 to 49 who had ANC visit during their current or most recent pregnancy within the five years prior to the survey were included in this study. Women who attended prenatal appointments but whose gestational age was unknown at the first prenatal visit were excluded from the study.

**Outcome measures:** Participants were interviewed to respond the gestational age in months at which they made the first antenatal care visit. Multivariable Mixed-effects survival regression was fitted to identify factors associated with the time-to-initiation of ANC.

**Results:** In this study, the estimated mean survival time of pregnant women to initiate the first ANC visit in Ethiopia was found to be 6.8 months (95% CI: 6.68, 6.95). Women whose last birth was a caesarean section (AAF = 0.75, 95% CI: 0.61, 0.93), and women with higher education (AAF = 0.69; 95% CI: 0.50, 0.95) had a shorter time to initiate ANC early in the first trimester of pregnancy. However, being grand multiparous (AAF = 1.31; 95% CI: 1.05, 1.63), being previously in a union (AAF = 1.47; 95% CI: 1.07, 2.00), having a home birth (AFT = 1.35; 95% CI: 1.13, 1.61), and living in a rural area (AAF = 1.25; 95% CI: 1.03, 1.52) were the impediments for early ANC initiation.

**Conclusion:** Women in this study area sought their initial antenatal care far later than the WHO recommended. Therefore, healthcare providers should collaborate with community health workers to provide home-based care in order to encourage prompt ANC among hard-to-reach populations, such as rural residents and those giving birth at home.

## Strength and limitations of this study

- ◆ This study used a large, nationally representative sample from Ethiopian survey data.
- ◆ This study evaluated community- and individual-level factors related to the survival time to initiation of ANC visit using a robust model.
- ◆ Many factors that could affect the timing of the first ANC visit were not taken into account in this study because they were not present in the original data.
- ◆ Social desirability bias is likely to arise because the data were collected through self-reported interviews with participants.

## Introduction

A healthy pregnancy for both mother and child, a smooth transition to a happy labor and delivery experience, and successful parenthood are all aspects of the positive pregnancy experience that women want and need.(1) However, the morbidity and mortality rates associated with pregnancy that are preventable are still too high at the outset of the Sustainable Development Goals (SDG) period. In order to improve the pregnancy's outcome, antenatal care (ANC) is a crucial time for health promotion, screening, and disease prevention.(2) For multidisciplinary care providers, the early antenatal care visit is the best opportunity to intervene with health promotion activities and establish a baseline knowledge of the pregnant woman's pre-existing medical conditions.(3)

Early detection of modifiable risk factors and pre-existing conditions is made possible by timely prenatal care initiation, which is defined as the first antenatal contact taking place during the first trimester of pregnancy.(4) The 2016 World Health Organization (WHO) recommendation also suggests early beginning of ANC within the first 12 weeks of gestation.(2) Women with early ANC initiation are more likely to have sufficient amount of antenatal care contacts.(5) A study from low and middle income countries have shown that receiving early ANC was associated with a higher likelihood of having eight plus ANC visit.(6) According to a Pakistani study, women who had their first ANC checkup within three months of being pregnant were more likely to obtain WHO-recommended services during their pregnancy, indicating that the timing of the checkup is a strong predictor of the content of services.(7)

There has been a significant improvement in the estimated global coverage of early prenatal care visits, going from 40.9% in 1990 to 84.8% in 2013, or a 43.3% increase.(4) The Estimated

1  
2  
3 coverage of early prenatal care visits in low-income countries (LMICs) in 2013 was 24 percent,  
4 compared to 81 percent in high-income countries.(4) Data from these nations' Demographic  
5 Health Surveys (DHS) from 2012 to 2018 show that this percentage has climbed to 44.3%.(5)  
6  
7 Yet, this shows that the rate of early initiation of ANC in the LMICs is very far from the optimal  
8  
9 level.  
10

11  
12 A woman dies every two minutes due to pregnancy or childbirth according to United Nations  
13 (UN) estimates.(8) The poorest nations and those experiencing conflict continue to have the  
14 highest rates of maternal fatalities. With 3.6% of all maternal deaths worldwide in 2020, Ethiopia  
15 had the fourth-highest estimated number of maternal deaths, behind Democratic Republic of the  
16 Congo, Nigeria, and India.(8) Timely ANC initiation is essential to lowering maternal morbidity  
17 and mortality in countries with high rates of maternal morbidity and mortality.(9)  
18  
19  
20  
21  
22  
23

24 The magnitude timely initiation of ANC visit in Sub-Saharan Africa was 38.0%, ranging from  
25 14.5% in Mozambique to 68.6% in Liberia.(10) In Ethiopia, being one of the SSA countries, the  
26 problem is even worse. The median time to antenatal care initiation in the country was found to  
27 be 5 months.(11) The result from 2016 Ethiopian Demographic Health Survey (EDHS) revealed  
28 only 20% of pregnant women in Ethiopia start their ANC during the first trimester of their  
29 pregnancy.(12) Other studies in the country reported varying magnitude of early initiation of  
30 ANC; the proportion was found to be 46.8% in Bahirdar,(13) 21.71% in southern Ethiopia,(14)  
31 40.6% in Debre Markos,(15) 39.5% in Tselemt district of Tigray Region,(16) 27.5% in  
32 Axum,(17) 28.8% in Ilu-Ababor,(18) 34% in Bench-Sheko zone.(19)  
33  
34  
35  
36  
37  
38  
39

40 Predictors of timing of first antenatal care follow up from different literatures were  
41 residence,(10,12,20) household wealth,(10,21) educational status of the women,(10,11,17) media  
42 exposure,(10,11,20) occupation of the women,(22–24) parity,(11,25,26) husband  
43 education,(20,21) husband occupation,(20) distance from health facility,(10,26) and maternal  
44 age.(10,21,27)  
45  
46  
47  
48  
49

50 Despite various studies on identifying risk factors for time to first ANC follow-up were  
51 conducted in Ethiopia, only few studies found to be representative at the national level.  
52 Furthermore, almost all of the studies failed to consider community-level factors for time to  
53 initiation of ANC in Ethiopia. Updated and nationally representative information is very crucial  
54  
55  
56  
57  
58  
59  
60

1  
2  
3 for policy makers and other concerned bodies to improve the level of early antenatal care  
4 initiation. Respecting women's rights and providing them with early prenatal care is the first step  
5 in a lifetime of care that will improve both mother and child's health.(3) Therefore, this study  
6 undertook a retrospective analysis based on the 2019 Ethiopian Mini Demographic and Health  
7 survey (EMDHS) data set, to identify time-to-initiation of ANC and its predictors in Ethiopia.  
8  
9

## 12 **Methods**

### 15 **Study design and area**

16 This study undertook a retrospective analysis based on the 2019 Ethiopian Mini Demographic  
17 and Health survey (EMDHS) data set. Ethiopia is located in the Horn of Africa and shares a  
18 border with Eritrea, Djibouti, Somalia, Sudan, South Sudan, and Kenya. It is the second most  
19 populous nation in Africa, with over 110 million populations.(28) Based on the 2021 World  
20 Bank reports Ethiopia had a gross national income per capital of US\$ 940.(29)  
21  
22  
23  
24  
25

### 26 **Data source and sampling procedure**

27 Ethiopian Mini Demographic and Health Survey (EMDHS) 2019 data was used in this  
28 investigation. Once the Measure DHS website (<http://www.measuredhs.com>) was contacted  
29 online with an explanation of the study's purpose, the data were provided. The EMDHS 2019's  
30 under-five children's file (KR) and individual women's file contained the variables that were used  
31 in this investigation. The 2019 EMDHS sample was stratified and selected in two stages, and  
32 interviews were conducted face-to-face with permanent residents and visitors who stayed in the  
33 residences the day before the survey. The 2019 EMDHS sampling frame is a composite of all  
34 census enumeration areas (EAs) created for the upcoming 2019 Ethiopia Population and Housing  
35 Census (PHC) conducted by the Central Statistical Agency (CSA). The census frame includes  
36 the complete list of 149,093 EAs created for the 2019 PHC. An EA is a geographical area with  
37 an average of 131 households. The sampling frame includes data on the EA's location, type of  
38 residence (urban or rural), and the estimated number of residential households.(30)  
39  
40  
41  
42  
43  
44  
45  
46  
47  
48

### 49 **Study population**

50 All women aged 15 to 49 who had ANC during their current or most recent pregnancy within the  
51 five years prior to the survey were included in this study. Women who attended prenatal  
52 appointments but whose gestational age was unknown at the first prenatal visit were excluded  
53  
54  
55  
56  
57  
58  
59  
60

1  
2  
3 from the study. A total of 2933 women aged 15 to 49 who had ANC visit during their current or  
4 most recent pregnancy were therefore analyzed in this study.  
5  
6

## 7 **Study variables**

### 8 **Outcome of interest**

9  
10 The dependent variable is time-to-first ANC receipt among pregnant women which is measured  
11 in months. The event of interest considered as success (event = 1) if women had antenatal care in  
12 the first trimester of pregnancy and otherwise censored (censored = 0).  
13  
14  
15

### 16 **Independent variable**

17  
18 **Individual level factors** were women education level, household wealth index, birth interval,  
19 number of antenatal care visit, age of the women, media exposure and marital status.  
20  
21

22  
23 **Community level factors** were residence, region, community educational status, community  
24 ANC coverage and community poverty. The EMDHS did not collect data that can directly  
25 describe the clusters' characteristics except the place of residence and region. Therefore, other  
26 common community-level data were generated by aggregating the individual characteristics with  
27 our interest in a cluster. The aggregates were computed using the proportion of a given variables'  
28 subcategory we were concerned on in a given cluster. Since the aggregate value for all generated  
29 variable was not normally distributed. It was categorized into groups based on the national  
30 median values.  
31  
32  
33  
34  
35  
36

37  
38 The proportion of a given variable's subcategory in a particular cluster was used to construct the  
39 aggregates. The aggregate value for all newly created variables had a non-normal distribution, so  
40 it was split into two categories (low and high proportions) based on their median values.  
41  
42 Community women's education is measured as the proportion of women in the cluster with  
43 secondary or higher education. Community-level poverty was defined as the proportion of  
44 women in the bottom 2 household wealth quantiles (poorer and poorest) in the cluster. The  
45 percentage of women in a cluster who utilize ANC was used to define community ANC  
46 utilization. Place of residency and region were used as they were categorized in the EMDHS data  
47 set.  
48  
49  
50  
51  
52

### 53 **Operational definition**

54  
55 **Exposure to mass media:** a frequency of listening to the radio and watching television were  
56  
57  
58  
59  
60

1  
2  
3 considered exposure to mass media in this study by excluding exposure to magazines and  
4 newspapers. So, women exposed to either television or radio at least once per week considered  
5 exposed, if not exposed at all, taken as not exposed.  
6  
7

8 **Community women education:** Was defined as the proportion of mother's who attended  
9 primary/secondary/ higher education within the cluster. The aggregate of individual mother's  
10 primary/secondary/higher educational attainment can show the overall educational status of  
11 women within the cluster. There were two categories for this variable with reference to the  
12 national median value: higher proportion of mother's who attended primary/secondary/higher  
13 education and lower proportion of mother's who attended primary/secondary/higher education  
14 within the cluster.  
15  
16  
17  
18  
19

20 **Antenatal care utilization:** was defined as mothers who had at least four antenatal care visit.(2)

21 **Community antenatal coverage:** The proportion of women in the clusters who had four and  
22 above antenatal care (ANC) from a skilled provider during the pregnancy of last delivery.  
23  
24

25 **Community poverty status:** It is defined as the proportion of poor or poorest mothers within the  
26 cluster. Within the cluster proportion of poor or poorest were aggregated and show over all  
27 poverty status within the cluster.  
28  
29  
30

### 31 **Data Quality Control and Assurance**

32 The data sets for the original work were collected by face-to-face interviewing women using  
33 structured questionnaires that met the eligibility criteria. The woman's questionnaire, the  
34 household questionnaire, and the Health Facility Questionnaire were employed to gather  
35 essential information. After the questionnaires were finalized in English, they were translated  
36 into Amharic, Tigrigna, and Afaan Oromo. In addition to this, the gathered data was back-  
37 translated into English to keep consistency. The quality of the dataset has maintained by testing  
38 its completeness. Moreover, the quality of the original data set was maintained by giving training  
39 to interviewers, and interviewers used tablet computers to record responses during the  
40 interviews.  
41  
42  
43  
44  
45  
46  
47

48 For this study, the data were weighted using sampling weight before any statistical analysis to  
49 restore the representativeness of the data and to get a reliable estimate and standard error. The  
50 weighted results from the analysis were reported in the study. Multicollinearity between  
51 independent variables was checked using Variance Inflation Factor (VIF) and the mean VIF was  
52 2.11. The proportional hazards (PH) assumption was tested using Scaled Schoenfeld residuals  
53  
54  
55  
56  
57  
58  
59  
60



1  
2  
3 and found to be unsatisfied, with a global test value of 0.0001. Multicollinearity between  
4 independent variables was checked using Variance Inflation Factor (VIF) and the mean VIF was  
5 2.11. The data was also assessed for an interaction factor.  
6  
7

## 8 9 **Data Management and Analysis**

10  
11 STATA version 14 software was used for cleaning, recoding, and analyzing the data. Descriptive  
12 statistics were applied using frequencies and percentages. Estimation of survival probability was  
13 done by using the Kaplan Meier survival curve. Survival curves were compared by log-rank test.  
14 Univariable survival regression was fitted for explanatory variables and those having p-value  
15  $\leq 0.25$  level of significance were considered for the multivariable analysis. Then, the study  
16 applied a stepwise backward variable selection procedure to obtain the final reduced model. The  
17 proportional hazards (PH) assumption was tested using Scaled Schoenfeld residuals and found to  
18 be unsatisfied, with a global test value of 0.0001. Finally, a multivariable mixed-effects  
19 parametric Weibull distribution survival regression model was fitted. Adjusted Acceleration  
20 Factor (AAF) or Time ratio with its 95% confidence interval (CI) was applied, and covariates  
21 with a P-value  $< 0.05$  in the multivariable analysis were considered determinants of the survival  
22 time to first ANC visit.  
23  
24  
25  
26  
27  
28  
29  
30  
31

## 32 **Survival analysis**

33  
34 Survival analysis deals with the analysis of survival data, which is used to measure the time to an  
35 event of interest, such as death or failure.<sup>(31)</sup> The Cox proportional hazard model is one of the  
36 most widely used regression model types in survival analysis. The Cox model estimates the  
37 hazard ratio, which is always a nonnegative value. The primary attribute of the Cox model is its  
38 reliance on the proportional hazards assumption, which states that "coefficients of the hazard  
39 function must remain constant across time for a given covariate".<sup>(31)</sup>  
40  
41  
42  
43  
44

## 45 **Parametric acceleration failure time model**

46  
47 An acceleration failure time model (AFT) is a parametric model in the statistical field of survival  
48 analysis that offers an alternative to the often used PH models. The primary distinction between  
49 Cox model and AFT is that the baseline hazard function is supposed to follow a specific  
50 distribution in AFT models. Covariate multiplies the hazard by a constant in a PH model, while it  
51 accelerates or decelerates a failure status's life cycle (initiation, discontinuation, disease, death or  
52 recovery) by a constant in an AFT model.<sup>(32)</sup>  
53  
54  
55  
56  
57  
58  
59  
60

Accelerated Failure Time (AFT) model is a model used for adjusting survivor functions for the effects of covariates. In the AFT parameterization, the natural logarithm of the survival time,  $\log t$ , is expressed as a linear function of the covariates:(31)

$$\log(t_j) = X_j\beta + Z_ju_j + v_j \dots \dots \dots 1$$

for  $j = 1, \dots, M$  clusters with cluster  $j$  consisting of  $i = 1, \dots, n_j$  observations. The vector  $x_{ji}$  contains the covariates for the fixed effects, with regression coefficients (fixed effect)  $\beta$ . The vector  $z_{ji}$  contains the covariates corresponding to the random effects  $u_j$ .  $v_{ji}$  are observation-level errors with density  $\phi(\cdot)$ . The distributional form of the error term determines the regression model. Five regression models are implemented in *mestreg* using the AFT parameterization: exponential, gamma, loglogistic, lognormal, and Weibull. Therefore, this study fitted a random-effects Weibull model with normally distributed random effects. This model can be viewed as a shared frailty model with lognormal frailty.

#### Mixed-effects parametric survival analysis

The EMDHS used a multistage cluster sampling technique, whereby data were hierarchical (i.e., pregnant women were nested within households, and households were nested within clusters). Considering the hierarchical nature of EMDHS data, pregnant women who lived within the same cluster may have had similar characteristics compared to those who reside in other clusters of the country. Therefore, a two-stage multivariable mixed-effects parametric survival regression analysis was employed to estimate the effects of individual and community level predictors on the survival time to first ANC visit. Mixed-effects survival models contain both fixed effects and random effects.

Four models were fitted to identify community and individual level factors associated with infant death. The first model (Model 1 or empty model) contained no explanatory variables. The second model (Model 2) considered only the individual-level variables in order to examine the individual-level effect. The third model (Model 3) considered only the community-level variables in order to examine the effect of community-level factors on infant death, independent of other factors. The fourth model (Model 4) is the full model that incorporated all individual and community-level variables into the multilevel analysis.

The fixed effect sizes of individual and community-level determinants of the survival time to first ANC visit were expressed as AAFs with 95% CI. The P-value  $<0.05$  has been considered as statistically significant. Additionally, the measure of variance (random effects) was reported in

1  
2  
3 terms of the intraclass correlation coefficient (ICC), median acceleration factor (MAF), and  
4 proportional change in variance (PCV). Model fitness was checked using Akaike Information  
5 Criteria (AIC) and Deviance Information Criteria (DIC). The lowest AIC and DIC values declare  
6 the best fit model.(31)  
7  
8  
9

## 10 **Patient and public involvement**

11  
12 Women in their reproductive years who had ANC during their current or most recent pregnancy  
13 within the five years prior to the survey took part in this study and contributed vital data.  
14 However, they never participated in conducting the study, designing the protocol or instruments  
15 used to gather the study's data, reporting the findings, or distributing them.  
16  
17  
18  
19  
20

## 21 **Result**

### 22 **Descriptive statistics**

23  
24 Weighted samples of 2924 women were followed for a minimum of 1 and a maximum of 10  
25 months with an average follow up time of 4 months. In this study, timely initiation of ANC visit  
26 in Ethiopia was found to be 42.7% (95% CI: 41.0 – 44.6). The estimated mean (restricted)  
27 survival time of pregnant women to initiate the first ANC visit was 6.8 months (95% CI: 6.68,  
28 6.95). The overall incidence rate was approximately 11 per 100 person month of observation.  
29 Majority 2755 (94.2%) of women were currently married or in union, and of these 1030 (37.4%)  
30 had initiated ANC visit early in the first trimester of pregnancy. Regarding women education,  
31 1283 (43.9%) women had no education, and among these 404(31.5%) initiated their ANC visit  
32 timely. Access to media was reported by 1259(43.1%) of whom 582(46.2%) had started ANC  
33 visit within 12 weeks of pregnancy. More than half 114(58.5%) of women who gave birth by C/S  
34 started their first ANC visit within the first trimester (Table 1 Summary of individual and  
35 community level factors of time to ANC initiation among study participants (2924), 2022).  
36  
37

38  
39 Most 2052(70.2%) of the women were rural residents, and among these only 647(31.5%) women  
40 initiated ANC visit within the recommended time. The proportion of women starting first ANC  
41 visit within the first trimester was higher in Harari (66.7%), Dire Dawa (66.7%) and Addis  
42 Ababa (65%), whereas lower in the SNNPR (28.8%), Oromia (33.2%) and Somali (33.3%)  
43 regional states. More than half 1577(53.9) of the women were from a community with a low  
44  
45  
46  
47  
48  
49  
50  
51  
52  
53  
54  
55  
56  
57  
58  
59  
60

1  
2  
3 poor proportion of whom 740(46.9%) commenced their first ANC visit in the first three months  
4 of pregnancy. Moreover, 353(26.2%) women from a community with a high poor proportion  
5 commenced their first ANC visit timely (Table 1 Summary of individual and community level  
6 factors of time to ANC initiation among study participants (2924), 2022).  
7  
8  
9

### 10 11 12 13 14 15 16 17 18 **Comparison of the different covariate in terms of survival time to first ANC visit**

19  
20 Kaplan Meier graphs are generated to observe the difference in the survival time to first ANC  
21 visit of women for different categorical variables. The log-rank test was carried out to validate  
22 the difference between the groups of each categorical variable. The log-rank test result (Table 2)  
23 shows that there is statistically significant difference in the survival experience of groups among  
24 women education level ( $p < 0.0001$ ), wealth index ( $p < 0.0001$ ), delivery place ( $p < 0.0001$ ),  
25 parity ( $p < 0.0001$ ), media access ( $p < 0.0001$ ), region ( $p < 0.0001$ ), women age ( $p < 0.001$ ) and  
26 Marital status ( $p < 0.2$ ) (Table 2 Comparison of survival time of individual and community level  
27 factors of time to ANC initiation among study participants (2924), 2022).  
28  
29  
30  
31  
32  
33  
34  
35  
36

### 37 **Random effects and model comparison**

38  
39 As the multilevel mixed-effects Weibull survival regression analysis results described in Table 3,  
40 Model I revealed statistically significant variation in the survival time to first ANC visit of  
41 women across communities. Nearly One fifth of the variation in the survival time is attributed to  
42 community-level factors (ICC = 18.9%). After adjusting the model for individual-level factors  
43 (Model II), about 32.4% of the variation in the accelerations of survival time was attributed to  
44 the individual level factors (PCV = 32.4%), and 13.6% of the variance in the survival time was  
45 attributed to community-level factors (ICC = 13.6%). Model III, which was adjusted for  
46 community-level factors, revealed that the community level factors explained 4.12% of the  
47 variability in the accelerations of survival time to first ANC visit of women (PCV = 4.12%), and  
48 13.1% of the variation among the clusters was attributed to community-level factors (ICC =  
49  
50  
51  
52  
53  
54  
55  
56  
57  
58  
59  
60

1  
2  
3 13.1%) (Table 3 Measures of variation and model fit statistics for time to first ANC visit among  
4 women in Ethiopia, 2023).  
5  
6

7 The final best-fit model (model IV) was adjusted for both individual and community-level  
8 factors simultaneously. In this final model (model IV), as indicated by the PCV, 16.1% of the  
9 variation in the survival time across communities was explained by both individual and  
10 community-level factors. Including both individual- and community-level factors reduced the  
11 unexplained heterogeneity in the time to first ANC visit between communities from MAF of  
12 2.31 in the null model to the MAF of 1.85 in the final model, which equals 0.46. This showed  
13 that the survival time to first ANC visit reduced by 54% when a woman moved from high risk to  
14 low-risk neighborhoods (Table 3 Measures of variation and model fit statistics for time to first  
15 ANC visit among women in Ethiopia, 2023).  
16  
17  
18  
19  
20  
21  
22

23 Based on the AIC and DIC, Multilevel mixed-effects Weibull survival model (Model IV) was  
24 found the best model to fit the data with a minimum AIC and DIC values of 4075.578 and  
25 4021.578, respectively ""Supplemental Table 1"".  
26  
27  
28

29 The survival plot in **Error! Reference source not found.** shows that the survivor function for  
30 rural women is above the survivor function for urban women. This implies that rural women  
31 have a greater probability of not initiating an ANC visit at earlier gestational age (**Error!  
32 Reference source not found.**).  
33  
34  
35  
36

### 37 **Interpretation of the multilevel Weibull model results**

38 The results of multivariable multilevel parametric Weibull survival analysis of predictors of the  
39 survival time to first ANC visit is provided in Table 4 (Table 4 Mixed-effects Weibull AFT  
40 survival regression of time to first ANC visit among women in Ethiopia, 2023).  
41  
42  
43  
44

45 The acceleration factor for mothers who gave birth in Home compared to those delivered in  
46 Health facility was 1.35 (95% CI: 1.13, 1.61). This shows that Home delivered mothers have a  
47 35% longer survival time to start a first ANC visit. Similarly, Grand multiparous women have a  
48 31% longer time to start ANC early in the first trimester than primipara women. The acceleration  
49 factor for Grand multiparous women was 1.31 (95% CI: 1.05, 1.63).  
50  
51  
52  
53  
54  
55  
56  
57  
58  
59  
60

1  
2  
3 Women with higher education had a 31% shortened time to start first ANC visit than those who  
4 were not educated. The acceleration factor for women with higher education was 0.69 (95% CI:  
5 0.50, 0.95). Similarly, women whose last birth was caesarean section had a 25% shorter time to  
6 initiate ANC early in the first trimester as compared to those who delivered vaginally (AAF =  
7 0.75, 95% CI: 0.61, 0.93) (Table 4 Mixed-effects Weibull AFT survival regression of time to  
8 first ANC visit among women in Ethiopia, 2023).  
9

10  
11  
12  
13  
14 The acceleration factor for mothers who were formerly in union was 1.47 (95% CI: 1.07, 2.00).  
15 This indicates that mothers who were formerly in union commenced ANC visit later than  
16 mothers who were currently in union at 5% level of significance (Table 4 Mixed-effects Weibull  
17 AFT survival regression of time to first ANC visit among women in Ethiopia, 2023).  
18  
19

20  
21  
22 Place of residence was found to be a significant predictor of the survival time to first ANC visit.  
23 The acceleration factor for women who were rural residents was 1.25 (95% CI: 1.03, 1.52). This  
24 shows that women from a rural residency had 1.25 times prolonged time to start their first ANC  
25 visit early in pregnancy relative to those who were from an urban residency. Administrative  
26 region was also a significant predictor of time to first ANC visit (Table 4 Mixed-effects Weibull  
27 AFT survival regression of time to first ANC visit among women in Ethiopia, 2023).  
28  
29  
30  
31

## 32 33 Discussion

34  
35  
36 In this study, Ethiopian pregnant women's time-to-initiation of ANC and its predictors were  
37 evaluated. Pregnant women's mean survival time to schedule their first ANC check was thus 6.8  
38 months (95% CI: 6.68, 6.95). Furthermore, the time-to-initiation of ANC was significantly  
39 associated with factors such as women's educational attainment, prior cesarean birth, parity,  
40 marital status, place of delivery, place of residency, and region of residency.  
41  
42  
43  
44

45  
46 The mean survival time of pregnant women to initiate ANC visit in this study was significantly  
47 higher than a study done in India in which the reported median survival time to first ANC visit  
48 was 4 months. (33) The finding of this study is also slightly higher than the study finding from  
49 Nigeria in which the median survival time for the first ANC checkup was found to be 6  
50 months.(34) Moreover, this finding is higher when compared to the recent findings of average of  
51  
52  
53  
54  
55  
56  
57  
58  
59  
60

1  
2  
3 3.4 gestational months before initiation of ANC visit in Ghana.(27) However, late initiation of  
4 ANC visit has been previously reported in Ethiopia with a median survival time of 7 months.(35)  
5  
6

7  
8 Timely initiation of ANC visit within the first three months of pregnancy in Ethiopia was found  
9 to be 42.7% (95% CI: 41.0, 44.6). This finding is lower than the study conducted in Pakistan  
10 which indicated that nearly half of women (48%) received ANC within 3 months of  
11 pregnancy.(7) This finding is significantly higher than studies done in Tanzania,(36) Benin,(37)  
12 Kenya,(38) and Nigeria,(34) but lower compared to a study from Ghana, where first trimester  
13 initiation of ANC visit was reported to be as high as 57%.(27) This result is higher than the  
14 previous study conducted in Ethiopia that reported timely initiation of ANC visit of 38.6%.(35)  
15  
16  
17  
18  
19

20  
21 Women who had higher education had a 31% shortened time to start first ANC visit than those  
22 with no formal education. This finding is in agreement with findings of previous studies.  
23 (11,33,39) A study conducted in India revealed that women with higher education had a 2.8  
24 times shorter time to initiation of ANC in the first trimester of pregnancy compared to women  
25 having no formal education.(33) Similarly, in Nepal, women with higher level education were  
26 significantly more likely to initiate ANC early compared to women who had no education.(39) A  
27 multi-country analysis of DHS in SSA found that the odd of timely initiation of ANC was higher  
28 in mothers who had higher level of education compared to women who had no formal  
29 education.(10) A study from Nigeria revealed that women with higher education were more  
30 likely to start first ANC visit early compared to uneducated women.(34) A retrospective study  
31 from Ethiopia revealed that early initiation of ANC increases as the women's level of education  
32 increases compared to women who have no formal education.(11)  
33  
34  
35  
36  
37  
38  
39  
40  
41

42 The possible explanation could be due to women with a higher level of education might be more  
43 likely to be employed, financially independent, and knowledgeable on the necessity of having  
44 antenatal care follow-up during pregnancy, as a result, they might be more likely to realize the  
45 importance of early booking their first ANC visit timely.(40) Additionally, uneducated women  
46 might have limited understanding of ANC services and their importance to their unborn fetus  
47 wellbeing and ensure safe delivery.(11) It is because education will change the knowledge when  
48 to start ANC awareness of the mothers to start and follow the health services appropriately.(18)  
49  
50  
51  
52  
53  
54  
55  
56  
57  
58  
59  
60

1  
2  
3 This study indicated that women who were formerly in union commenced ANC visit later than  
4 mothers who were currently in union at 5% level of significance. The findings of this study  
5 indicate that having the father of the child present in the woman's life during pregnancy shortens  
6 the time to first ANC attendance and highlight a need to involve male partners in reproductive  
7 health issues including maternal health care and family planning. This evidence is in line with  
8 the studies done in South Africa(24) and Rwanda(26) in which currently married women were  
9 more likely to initiate ANC in the first trimester of pregnancy.  
10  
11

12  
13  
14  
15  
16 This might be due to the fear of social rumors, and hence, lack of confidence in seeking care for  
17 unborn child whose father is not formal or in doubt. Another possible explanation can be the  
18 work load hanged on her shoulder only to improve the life of her unborn child and herself too.  
19 Furthermore, they might not know whether they are pregnant timely, and even if they knew it  
20 early, they may not be interested with the pregnancy, they may be careless for the conception and  
21 fail to book early. Women with an unwanted (24) and mistimed pregnancies (41) have been  
22 show to receive late ANC.  
23  
24  
25  
26  
27  
28

29 Grand multiparous women had a 31% longer time to start ANC early in the first trimester than  
30 primipara women. This evidence is supported by prior studies.(11,33,41,42) A study finding  
31 from India has shown that women with birth order of 4 and above had a 16% prolonged time to  
32 initiation of ANC compared to Primipara women.(33) In Malawi, women with more than five  
33 births were 12% less likely to access ANC services in their first trimester of pregnancy.(42) In  
34 Nigeria, women with one birth were more likely to initiate ANC in the first trimester compared  
35 to women with five and above births.(21) In Kenya, women with four and above births were 1.75  
36 times more likely to start their first antenatal care late in pregnancy during the second and third  
37 trimesters of pregnancy compared to the Primipara women.(41)  
38  
39  
40  
41  
42  
43  
44

45 A survival study from Ethiopia found that women with four and above births had a 20% hazard  
46 of delayed initiation of ANC follow up as compared to one parity.(11) Another population study  
47 from Ethiopia showed that multi-parous women had higher odds of delayed initiation of ANC  
48 visit when compared to the primi-parous women.(23) This might be attributable to high parity  
49 women's increased confidence from previous pregnancy and childbirth experience. Additionally,  
50 high parity women might have poor prior experience with the health system, and constraints of  
51 time and resources to access ANC services early.(38)  
52  
53  
54  
55  
56  
57  
58  
59  
60



1  
2  
3 This study also showed that women from a rural residency had a prolonged time to start their  
4 first ANC visit relative to those who were from an urban residency. In India, urban residents had  
5 a 49% probability of initiating ANC early in the first trimester of pregnancy compared to rural  
6 counterparts.(33) In SSA, women residing in the rural area were less likely to initiate ANC  
7 timely within 12 weeks of gestation.(10) In Nigeria, women in urban areas were more likely to  
8 make the first ANC visit early in the first trimester of pregnancy.(34) A study from Kenya  
9 showed that the odds of timely initiation of ANC in the first 3 months of pregnancy was higher  
10 in women living in urban areas compared to the rural counterparts.(41)  
11  
12  
13  
14  
15  
16  
17

18 A study in Ethiopia using the 2016 EDHS data set indicated that rural women have prolonged  
19 time-to start first ANC visit than urban women.(20) In Ethiopia, women from rural residency  
20 were 18% less likely to attained ANC early in pregnancy than urban counter parts.(11) Another  
21 similar study in Ethiopia showed that rural women were 59% less likely to start their first ANC  
22 visit within the first trimester than urban counterparts.(12) This might be because urban women  
23 have easier access to transportation and social media, which help them easily, obtain information  
24 about the significance, timeliness and services offered by healthcare facilities.  
25  
26  
27  
28  
29  
30

31 Place of delivery was found to be a significant predictor of the survival time to first ANC visit.  
32 Women whose last birth was in Home had a 35% longer survival time to start a first ANC visit  
33 compared to those whose last birth was in Health facility. This result is supported by the finding  
34 reported from Western Ethiopia in which women whose previous childbirth was institutional  
35 delivery were five times more likely to initiate ANC early when compared with women who had  
36 a home delivery.(43) A study from Mandera County in Kenya reported that women who utilized  
37 skilled delivery service were more likely to have used ANC services more than those who had  
38 not utilized the service.(38) A possible explanation might be that mothers who gave birth at  
39 health institutions might receive advice and relevant information regarding the importance of  
40 early antenatal booking for themselves and their fetuses, which might positively influence  
41 women's attitudes towards early ANC visits.  
42  
43  
44  
45  
46  
47  
48  
49

50 This study showed that women whose last birth was caesarean section had a 25% shorter time to  
51 start first ANC than those who gave their last birth vaginally. This finding is supported with  
52 previous similar studies.(36,38,44) A study done in Uganda showed that women who gave birth  
53 by caesarean section were more likely to initiate the first ANC visit in the first trimester of  
54  
55  
56  
57  
58  
59  
60

1  
2  
3 pregnancy.(44) According to a study from Tanzania, women with a history of previous or current  
4 pregnancy-related complications were more likely to book earlier than others.(36) In Kenya,  
5 women who had complications during last pregnancy were two times more likely to utilize ANC  
6 than those who had no complication.(38) This might be due to the fact that women who had  
7 complications in the previous pregnancy might have worries about them-selves and their fetus's  
8 health which compels them to better use antenatal care services.  
9

10  
11 Regarding geographical region of the country, women from SNNPR had a 46% prolonged time  
12 to start first ANC compared to women from Addis Ababa. This might be related to the difference  
13 in availability of health facilities. The population in the SNNPR is more dispersed making the  
14 accessibility of health facilities difficult, and women from those areas might be less informed  
15 about the benefits of antenatal care. Additionally, women from Harari were found to have a  
16 shorter time to commence ANC.  
17  
18

### 19 **Study limitations and strengths**

20  
21 This study used secondary data that were collected cross-sectionally through self-reported  
22 interviews, which are prone to recall errors and social desirability bias. In addition, some factors  
23 that are probably crucial in determining the timing of the first ANC visit were not available for  
24 consideration in the existing EMDHS data, such as the standard of ANC provided and women's  
25 perceptions of the ANC. Despite these drawbacks, the current study used a large sample from  
26 nationally representative survey data in Ethiopia. The study's findings were representative of all  
27 regions. The study also attempted to analyze community-level variables related to the survival  
28 time to first ANC visit. Another advantage of the study is its sophisticated statistical design,  
29 which allows for greater reliability of the results and allows for the control of confounding  
30 factors.  
31  
32  
33  
34  
35  
36  
37  
38  
39  
40  
41  
42  
43  
44  
45  
46

### 47 **Conclusion**

48  
49 The study indicated that women in the study area sought their initial antenatal care at a health  
50 facility far later than the WHO recommended. The independent predictors, women's education  
51 level, media exposure, and prior cesarean delivery made early ANC initiation possible.  
52 Increasing parity, being previously in a union, having a home birth, and living in a rural area  
53 were the impediments for early ANC initiation.  
54  
55  
56  
57  
58  
59  
60

1  
2  
3 It's crucial to provide health education with a focus on empowering expectant mothers to timely  
4 activate prenatal care, especially for those who give birth at home and for those who reside in  
5 remote areas. Healthcare providers should collaborate with community health workers to provide  
6 home-based care in order to encourage prompt ANC among hard-to-reach populations, such as  
7 rural residents and those giving birth at home.  
8  
9

10  
11  
12 This study also has the implication that policies aiming to decrease pregnancy-related  
13 preventable morbidity and mortality through the use of timely antenatal care must prioritize  
14 educating and empowering women.  
15  
16  
17

### 18 19 20 **Abbreviations and Acronyms**

21 AAF: Adjusted Acceleration Factor; AFT: Accelerated Failure Time; ANC: Antenatal Care; CI:  
22 Confidence Interval; DHS: Demographic and Health Survey; EMDHS: Ethiopian Mini  
23 Demographic and Health Survey; ICC: Intraclass Correlation Coefficient; MAF: Median  
24 Acceleration Factor; PCV: Proportional Change in Variance; PNC: Postnatal Care.  
25  
26  
27  
28  
29

### 30 31 **Funding**

32 There was no funding for this research.  
33  
34  
35

### 36 37 **Availability of data**

38 The data sets recoded and analyzed during this study are available in the Measure DHS program  
39 repository to all registered users ([https://www.dhsprogram.com/data/dataset\\_admin](https://www.dhsprogram.com/data/dataset_admin))  
40  
41  
42  
43

### 44 45 **Declarations**

#### 46 47 **Ethics approval and consent to participate**

48 Ethics review and participant consent were not required for this study because it used secondary  
49 data analysis of publicly available survey data from the Measure DHS program. A written letter  
50 of permission was secured from the IRB of Demographic and Health Survey (DHS) program  
51 data archivists to download and use the data for this study from <https://www.dhsprogram.com>.  
52 This study was performed in line with the principles of the Declaration of Helsinki. The DHS  
53  
54  
55  
56  
57  
58  
59

1  
2  
3 data were kept confidential, and any identifying information was removed. The data was only  
4 used for this particular, authorized research project, and it would not be shared with  
5 any researchers.  
6  
7

### 8 9 **Competing interests**

10  
11 The authors declare that they have no competing interests.  
12  
13

### 14 15 **Acknowledgment**

16  
17 The authors would like to thank the MEASURE DHS Project for their free access to the original  
18 data of the 2019 Mini Demographic and Health Survey of Ethiopia.  
19  
20

### 21 22 **Author contributions**

23  
24 BTO and HZA conceived the study, participated in its design and coordination, initiated the  
25 research, carried out the statistical analysis, interpreted the results, and wrote the final  
26 manuscript, critically reviewing it. MA and DGT participated in the study's design, guided the  
27 statistical analysis, and critically reviewed the manuscript. HI and TG were involved in principal  
28 supervision, participated in the study's design and coordination, edited the manuscript, and  
29 critically reviewed the manuscript. BTO has main responsibility for the final content, and makes  
30 the decision to publish. The authors have read and approved the final manuscript.  
31  
32  
33  
34  
35  
36  
37

### 38 39 **References**

- 40 1. Tolossa T, Turi E, Fetensa G, Fekadu G, Kebede F. Association between pregnancy  
41 intention and late initiation of antenatal care among pregnant women in Ethiopia: A  
42 systematic review and meta-analysis. *Syst Rev*. 2020;9(1):1–10.  
43
- 44 2. World Health Organization. WHO recommendations on antenatal care for a positive  
45 pregnancy experience. World Health Organization. 2016.  
46
- 47 3. Raynes-Greenow C. Gaps and challenges underpinning the first analysis of global  
48 coverage of early antenatal care. *Lancet Glob Heal* [Internet]. 2017;5(10):e949–50.  
49 Available from: [http://dx.doi.org/10.1016/S2214-  
50 109X\(17\)30346-7](http://dx.doi.org/10.1016/S2214-109X(17)30346-7)  
51
- 52 4. Moller AB, Petzold M, Chou D, Say L. Early antenatal care visit: a systematic analysis of  
53 regional and global levels and trends of coverage from 1990 to 2013. *Lancet Glob Heal*  
54 [Internet]. 2017;5(10):e977–83. Available from: [http://dx.doi.org/10.1016/S2214-  
56 109X\(17\)30325-X](http://dx.doi.org/10.1016/S2214-<br/>55 109X(17)30325-X)  
57  
58  
59  
60

- 1
  - 2
  - 3
  - 4
  - 5
  - 6
  - 7
  - 8
  - 9
  - 10
  - 11
  - 12
  - 13
  - 14
  - 15
  - 16
  - 17
  - 18
  - 19
  - 20
  - 21
  - 22
  - 23
  - 24
  - 25
  - 26
  - 27
  - 28
  - 29
  - 30
  - 31
  - 32
  - 33
  - 34
  - 35
  - 36
  - 37
  - 38
  - 39
  - 40
  - 41
  - 42
  - 43
  - 44
  - 45
  - 46
  - 47
  - 48
  - 49
  - 50
  - 51
  - 52
  - 53
  - 54
  - 55
  - 56
  - 57
  - 58
  - 59
  - 60
5. Jiwani SS, Amouzou A, Carvajal-Aguirre L, Chou D, Keita Y, Moran AC, et al. Timing and number of antenatal care contacts in low-and middle-income countries: Analysis in the Countdown to 2030 priority countries. *J Glob Health*. 2020;10(1).
6. Apanga PA, Kumbeni MT. Association between early antenatal care and antenatal care contacts across low-And middle-income countries: Effect modification by place of residence. *Epidemiol Health*. 2021;43:e2021092.
7. Agha S, Tappis H. The timing of antenatal care initiation and the content of care in Sindh, Pakistan. *BMC Pregnancy Childbirth*. 2016;16(190).
8. WHO, UNICEF UNFPA, WORLD BANK GROUP and UNDESA/Population Division. Trends in maternal mortality 2000 to 2020: estimates [Internet]. WHO, Geneva. 2023. Available from: <https://www.who.int/reproductivehealth/publications/maternal-mortality-2000-2017/en/>
9. Makate M, Makate C. Journal of Epidemiology and Global Health Prenatal care utilization in Zimbabwe : Examining the role of community-level factors. *J Epidemiol Glob Health* [Internet]. 2017;7(4):255–62. Available from: <https://doi.org/10.1016/j.jegh.2017.08.005>
10. Alem AZ, Yeshaw Y, Liyew AM, Tesema GA, Alamneh TS, Worku MG, et al. Timely initiation of antenatal care and its associated factors among pregnant women in sub-Saharan Africa: A multicountry analysis of Demographic and Health Surveys. *PLoS One* [Internet]. 2022;17(1):e0262411. Available from: <http://dx.doi.org/10.1371/journal.pone.0262411>
11. Dewau R, Muche A, Fentaw Z, Yalew M, Bitew G, Amsalu ET, et al. Time to initiation of antenatal care and its predictors among pregnant women in Ethiopia: Cox-gamma shared frailty model. *PLoS One* [Internet]. 2021;16(2):e0246349. Available from: <http://dx.doi.org/10.1371/journal.pone.0246349>
12. Woldeamanuel BT, Belachew TA. Timing of first antenatal care visits and number of items of antenatal care contents received and associated factors in Ethiopia: multilevel mixed effects analysis. *Reprod Health* [Internet]. 2021;18(1):1–16. Available from: <https://doi.org/10.1186/s12978-021-01275-9>
13. Alemu Y, Aragaw A. Early initiations of first antenatal care visit and associated factor among mothers who gave birth in the last six months preceding birth in Bahir Dar Zuria Woreda North West Ethiopia. *Reprod Health*. 2018;15(1):1–8.
14. Geta MB, Yallew WW. Early Initiation of Antenatal Care and Factors Associated with Early Antenatal Care Initiation at Health Facilities in Southern Ethiopia. *Adv Public Heal*. 2017;2017:1–6.
15. Wolde F, Mulaw Z, Zena T, Biadgo B, Limenih MA. Determinants of late initiation for antenatal care follow up: The case of northern Ethiopian pregnant women. *BMC Res Notes* [Internet]. 2018;11(1):1–7. Available from: <https://doi.org/10.1186/s13104-018-3938-9>

16. Weldemariam S, Damte A, Endris K, Palcon MC, Tesfay K, Berhe A, et al. Late antenatal care initiation: The case of public health centers in Ethiopia. *BMC Res Notes* [Internet]. 2018;11(1):1–6. Available from: <https://doi.org/10.1186/s13104-018-3653-6>
17. Gebresilassie B, Belete T, Tilahun W, Berhane B, Gebresilassie S. Timing of first antenatal care attendance and associated factors among pregnant women in public health institutions of Axum town, Tigray, Ethiopia, 2017: A mixed design study. *BMC Pregnancy Childbirth*. 2019;19(1):1–11.
18. Tola W, Negash E, Sileshi T, Wakgari N. Late initiation of antenatal care and associated factors among pregnant women attending antenatal clinic of Ilu Ababor Zone, southwest Ethiopia: A cross-sectional study. *PLoS One* [Internet]. 2021;16(1 January):1–11. Available from: <http://dx.doi.org/10.1371/journal.pone.0246230>
19. Tesfaye M, Dessie Y, Demena M, Yosef T. Late antenatal care initiation and its contributors among pregnant women at selected public health institutions in Southwest Ethiopia. *Pan Afr Med J*. 2021;39.
20. Fentaw KD, Fenta SM, Biresaw HB, Mulugeta SS. Time to first antenatal care visit among pregnant women in Ethiopia: secondary analysis of EDHS 2016; application of AFT shared frailty models. *Arch Public Heal*. 2021;79(1):1–14.
21. Fagbamigbe AF, Olaseinde O, Fagbamigbe OS. Timing of first antenatal care contact, its associated factors and state-level analysis in Nigeria: a cross-sectional assessment of compliance with the WHO guidelines. *BMJ Open*. 2021;11(9):e047835.
22. Agaba P, Magadi M, Onukwugha F, Misinde C. Factors associated with the timing and number of antenatal care visits among unmarried compared to married youth in Uganda between 2006 and 2016. *Soc Sci*. 2021;10(12).
23. Yaya S, Bishwajit G, Ekholuenetale M, Shah V, Kadio B, Udenigwe O. Timing and adequate attendance of antenatal care visits among women in Ethiopia. *PLoS One*. 2017;12(9):1–16.
24. Muhwava LS, Morojele N, London L. Psychosocial factors associated with early initiation and frequency of antenatal care (ANC) visits in a rural and urban setting in South Africa: A cross-sectional survey. *BMC Pregnancy Childbirth* [Internet]. 2016;16(1):1–9. Available from: <http://dx.doi.org/10.1186/s12884-016-0807-1>
25. Gross K, Alba S, Glass TR, Schellenberg JA, Obrist B. Timing of antenatal care for adolescent and adult pregnant women in south-eastern Tanzania. *BMC Pregnancy Childbirth*. 2012;12.
26. Munyaneza F, Mujawase F, Banamwana L, Sayinzoga F, Thomson DR, Ntaganira J, et al. Assessing predictors of delayed antenatal care visits in Rwanda : a secondary analysis of Rwanda demographic and health survey 2010. *BMC Pregnancy Childbirth*. 2016;14(290):1–8.
27. Manyeh AK, Amu A, Williams J, Gyapong M. Factors associated with the timing of

- antenatal clinic attendance among first-time mothers in rural southern Ghana. *BMC Pregnancy Childbirth*. 2020;20(1):1–7.
28. United Nations Department of Economic and Social Affairs PD. *World Population Prospects 2022: summary of results* [Internet]. United Nation. 2022. 1–54 p. Available from: [www.un.org/development/desa/pd/](http://www.un.org/development/desa/pd/).
29. World Bank. Ethiopia-GNI-per-capita [Internet]. [cited 2023 Apr 6]. Available from: <https://www.macrotrends.net/countries/ETH/ethiopia/gni-per-capita>
30. Ethiopian Public Health Institute (EPHI) [Ethiopia] and ICF. *Ethiopia Mini Demographic and Health Survey 2019: Key Indicators* [Internet]. Rockville, Maryland, USA: EPHI and ICF; 2019. Available from: <http://www.eph.gov.et>
31. Kleinbaum DG, Klein M. *Survival Analysis: A Self-Learning Text*. Third Edit. Springer; 2013. 292–318 p.
32. StataCorp. *Stata Survival Analysis Reference Manual Release 17* [Internet]. A Stata Press Publication. College Station, Texas: StataCorp LLC; 2021. Available from: <https://www.stata.com/bookstore/survival-analysis-reference-manual/>
33. Tripathy A, Mishra PS. Inequality in time to first antenatal care visits and its predictors among pregnant women in India : an evidence from national family health survey. *Sci Rep*. 2023;13(4706).
34. Fagbamigbe AF, Abel C, Mashabe B, Adebowale AS. Survival analysis and prognostic factors of the timing of first antenatal care visit in Nigeria. *Adv Integr Med* [Internet]. 2019;6(3):110–9. Available from: <https://doi.org/10.1016/j.aimed.2018.12.002>
35. Seid A, Ahmed M. Survival time to first antenatal care visit and its predictors among women in Ethiopia. *PLoS One*. 2021;1–5.
36. Kisaka L, Leshabari S. Factors Associated with First Antenatal Care Booking among Pregnant Women at a Reproductive Health Clinic in Tanzania: A Cross Sectional Study. *EC Gynaecol* [Internet]. 2020;9(2):1–12. Available from: [https://ecommons.aku.edu/eastafrica\\_fhs\\_sonam](https://ecommons.aku.edu/eastafrica_fhs_sonam)
37. Edgard-Marius O, Charles SJ, Jacques S, Justine GC-C, Virginie MA, Ibrahim MA, et al. Determinants of Low Antenatal Care Services Utilization during the First Trimester of Pregnancy in Southern Benin Rural Setting. *Univers J Public Heal*. 2015;3(5):220–8.
38. Adow I, Mwanzo I, Agina O, Wanzala P, Kariuki J. Uptake of antenatal care services among women of reproductive age in Mandera County, Kenya. *Afr J Health Sci* [Internet]. 2020;33(1):56–69. Available from: [https://indexmedicus.afro.who.int/AIM/opac\\_css/doc\\_num.php?explnum\\_id=73592](https://indexmedicus.afro.who.int/AIM/opac_css/doc_num.php?explnum_id=73592)
39. Gilles MT. Timing of First Antenatal Care ( ANC ) and Inequalities in Early Initiation of ANC in Nepal. 2017;5(September):1–6.
40. Tesfu A., Aweke A., Gela G., Wudineh K., Beyene F. Factors associated with timely

1  
2  
3 initiation of antenatal care among pregnant women in Bahir Dar city , Northwest  
4 Ethiopia : sectional study. 2022;(December 2021):1210–7.  
5

- 6  
7 41. Ochako R, Gichuhi W. Pregnancy wantedness, frequency and timing of antenatal care  
8 visit among women of childbearing age in Kenya. *Reprod Health*. 2016;13(51).  
9  
10 42. Kuuire VZ, Kangmennaang J, Atuoye KN, Antabe R, Boamah SA, Vercillo S, et al.  
11 Timing and utilisation of antenatal care service in Nigeria and Malawi. *Glob Public*  
12 *Health*. 2017;12(6):711–27.  
13  
14 43. Gelassa FR, Tafasa SM, Kumera D. Determinants of early antenatal care booking among  
15 pregnant mothers attending antenatal care at public health facilities in the Nole Kaba  
16 district, western Ethiopia: unmatched case-control study. *BMJ Open*. 2023;13:e073228.  
17  
18 44. Bbaale E. Factors influencing timing and frequency of antenatal care in Uganda. *Australas*  
19 *Med J*. 2011;4(8):431–8.  
20  
21  
22  
23  
24  
25  
26  
27  
28  
29  
30  
31  
32  
33  
34  
35  
36  
37  
38  
39  
40  
41  
42  
43  
44  
45  
46  
47  
48  
49  
50  
51  
52  
53  
54  
55  
56  
57  
58  
59  
60



**Table 1 Summary of individual and community level factors of time to ANC initiation among study participants (2924), 2022**

| Covariates               | Categories      | Time to ANC initiation |                | Total N (%) |
|--------------------------|-----------------|------------------------|----------------|-------------|
|                          |                 | Event N (%)            | Censored N (%) |             |
| Maternal education       | Higher          | 105(68.6)              | 48(31.4)       | 153(5.2)    |
|                          | Secondary       | 130(38.8)              | 205(61.2)      | 335(11.5)   |
|                          | Primary         | 452(39.2)              | 701(60.8)      | 1153(39.4)  |
|                          | No education    | 404(31.5)              | 879(68.5)      | 1283(43.9)  |
| Wealth Index             | Rich            | 647(48)                | 701(52)        | 1348(46.1)  |
|                          | Middle          | 182(31)                | 407(69)        | 589(20.1)   |
|                          | Poor            | 264(26.7)              | 723(73.3)      | 987(33.8)   |
| Household size (members) | 1-5             | 692(43.3)              | 907(56.7)      | 1599(54.7)  |
|                          | 6 or more       | 401(30.3)              | 924(69.7)      | 1325(45.3)  |
| Maternal age             | <20 years       | 48(31.4)               | 105(68.6)      | 153(5.2)    |
|                          | 20-34 years     | 846(39.2)              | 1310(60.8)     | 2156(73.8)  |
|                          | ≥35 years       | 199(32.4)              | 416(67.6)      | 615(21)     |
| Household head           | Female          | 156(40.4)              | 230(59.6)      | 386(13.2)   |
|                          | Male            | 937(36.9)              | 1601(63.1)     | 2538(86.8)  |
| Place of delivery        | Facility        | 801(42.4)              | 1088(57.6)     | 1889(64.6)  |
|                          | Home            | 292(28.2)              | 743(71.8)      | 1035(35.4)  |
| PNC                      | No              | 881(36.5)              | 1532(63.5)     | 2413(82.5)  |
|                          | Yes             | 212(41.5)              | 299(58.5)      | 511(17.5)   |
| Last birth C/S           | No              | 804(34.9)              | 1502(65.1)     | 2306(92.2)  |
|                          | Yes             | 114(58.5)              | 81(41.5)       | 195(7.8)    |
| Birth interval (2220)    | ≥36 months      | 478(37.6)              | 792(62.4)      | 1270(57.2)  |
|                          | <36 months      | 305(32.1)              | 645(67.9)      | 950(42.8)   |
| Ever had a child loss    | No              | 939(39.7)              | 1429(60.3)     | 2368(81)    |
|                          | Yes             | 154(27.7)              | 402(72.3)      | 556(9)      |
| Parity                   | Primi-para      | 299(43.4)              | 390(56.6)      | 689(23.6)   |
|                          | Multipara       | 559(40.8)              | 811(59.2)      | 1370(46.8)  |
|                          | Grand Multipara | 235(27.2)              | 630(72.8)      | 865(29.6)   |
| Residence                | Urban           | 445(51)                | 427(49)        | 872(29.8)   |
|                          | Rural           | 647(31.5)              | 1405(68.5)     | 2052(70.2)  |

|                           |      |           |            |            |
|---------------------------|------|-----------|------------|------------|
| Community ANC utilization | High | 718(43.3) | 937(56.6)  | 1655(56.6) |
|                           | Low  | 375(29.6) | 894(70.4)  | 1269(43.4) |
| Community women education | High | 696(39.7) | 1056(60.3) | 1752(59.9) |
|                           | Low  | 397(33.9) | 775(66.1)  | 1172(40.1) |
| Community level poverty   | Low  | 740(46.9) | 837(53.1)  | 1577(53.9) |
|                           | High | 353(26.2) | 994(73.8)  | 1347(46.1) |

**Note:** ANC = antenatal care; PNC = postnatal care; C/S = cesarean section

**Table 2 Comparison of survival time of individual and community level factors of time to ANC initiation among study participants (2924), 2022**

| Covariates                | Categories         | Time to ANC initiation |                | Log-rank test | P-value |
|---------------------------|--------------------|------------------------|----------------|---------------|---------|
|                           |                    | Event observed         | Event expected |               |         |
| Mothers education         | No education       | 404                    | 488            | 114.88        | 0.0001  |
|                           | Primary            | 452                    | 431            |               |         |
|                           | Secondary          | 131                    | 126            |               |         |
|                           | Higher             | 105                    | 47             |               |         |
| Household size            | <6 members         | 692                    | 585            | 54.22         | 0.0001  |
|                           | ≥6 members         | 400                    | 507            |               |         |
| Ever had a child loss     | No                 | 938                    | 876            | 28.21         | 0.0001  |
|                           | Yes                | 154                    | 216            |               |         |
| Women age                 | <20 years          | 49                     | 57             | 11.48         | 0.0032  |
|                           | 20-34 years        | 845                    | 802            |               |         |
|                           | ≥35 years          | 198                    | 233            |               |         |
| Birth interval            | ≥36 months         | 477                    | 442            | 8.49          | 0.0036  |
|                           | <36 months         | 305                    | 340            |               |         |
| PNC                       | No                 | 881                    | 909            | 6.82          | 0.0090  |
|                           | Yes                | 211                    | 183            |               |         |
| Marital status            | Currently in union | 1030                   | 1029           | 4.53          | 0.1039  |
|                           | Formerly in union  | 54                     | 59             |               |         |
|                           | Never in union     | 8                      | 4              |               |         |
| Household head            | Female             | 156                    | 140            | 2.68          | 0.1018  |
|                           | Male               | 936                    | 952            |               |         |
| Community level poverty   | Low                | 739                    | 569            | 136.88        | 0.0001  |
|                           | High               | 353                    | 523            |               |         |
| Residence                 | Urban              | 445                    | 310            | 105.30        | 0.0001  |
|                           | Rural              | 647                    | 782            |               |         |
| Community ANC utilization | High               | 717                    | 606            | 58.21         | 0.0001  |
|                           | Low                | 375                    | 486            |               |         |
| Community women education | High               | 695                    | 645            | 12.27         | 0.0005  |
|                           | Low                | 397                    | 447            |               |         |

**Note:** ANC = antenatal care; PNC = postnatal care

**Table 3 Measures of variation and model fit statistics for time to first ANC visit among women in Ethiopia, 2023**

|                             | Null model | Model II  | Model III | Model IV  |
|-----------------------------|------------|-----------|-----------|-----------|
| <b>Random effect result</b> |            |           |           |           |
| Variance                    | 0.7686926  | 0.519486  | 0.4981052 | 0.4178334 |
| ICC (%)                     | 18.9       | 13.6      | 13.1      | 11.3      |
| PCV (%)                     | Reference  | 32.4      | 4.12      | 16.1      |
| MAF                         | 2.31       | 1.99      | 1.96      | 1.85      |
| <b>Model fit statistics</b> |            |           |           |           |
| -Log likelihood             | -2343.361  | -2086.979 | -2281.065 | -2010.789 |
| AIC                         | 4692.722   | 4203.958  | 4594.130  | 4075.578  |
| DIC                         | 4686.722   | 4173.958  | 4562.130  | 4021.578  |

**Table 4 Mixed-effects Weibull AFT survival regression of time to first ANC visit among women in Ethiopia, 2023**

| Variables           | Categories          | Null Model | Model II           | Model III         | Model IV           |
|---------------------|---------------------|------------|--------------------|-------------------|--------------------|
| Place of last birth | Facility            |            | 1                  |                   | 1                  |
|                     | Home                |            | 1.11(0.98, 1.25)   |                   | 1.35(1.13, 1.61)** |
| Parity              | Primipara           |            | 1                  |                   | 1                  |
|                     | Multipara           |            | 1.09(0.96, 1.25)   |                   | 1.07(0.89, 1.28)   |
|                     | Grand multipara     |            | 1.19(1.03, 1.40)*  |                   | 1.31(1.04, 1.63)*  |
| Media Access        | No                  |            | 1                  |                   | 1                  |
|                     | Yes                 |            | 0.83(0.73, 0.94)** |                   | 0.90(0.76, 1.06)   |
| Last birth          | Vaginal             |            | 1                  |                   | 1                  |
|                     | C/S                 |            | 0.86(0.75, 0.98)*  |                   | 0.75(0.61, 0.93)** |
| Educational level   | No formal education |            | 1                  |                   | 1                  |
|                     | Primary             |            | 0.97(0.87, 1.09)   |                   | 0.87(0.73, 1.03)   |
|                     | Secondary           |            | 1.16(1.01, 1.34)*  |                   | 0.99(0.75, 1.33)   |
|                     | Higher              |            | 0.84(0.70, 0.99)*  |                   | 0.69(0.50, 0.95)*  |
| Marital status      | Currently in union  |            | 1                  |                   | 1                  |
|                     | Formerly in union   |            | 1.12(0.88, 1.44)   |                   | 1.47(1.07, 2.00)*  |
|                     | Never in union      |            | 0.64(0.37, 1.09)   |                   | 1.12(0.37, 3.40)   |
| PNC                 | No                  |            | 1                  |                   | 1                  |
|                     | Yes                 |            | 0.87(0.75, 1.00)   |                   | 0.83(0.67, 1.02)   |
| Community ANC       | Low                 |            |                    | 1                 | 1                  |
|                     | High                |            |                    | 0.95(0.85, 1.07)  | 0.90(0.77, 1.05)   |
| Community Education | Low                 |            |                    | 1                 | 1                  |
|                     | High                |            |                    | 0.95(0.85, 1.06)  | 1.15(0.99, 1.34)   |
| Residency           | Urban               |            |                    | 1                 | 1                  |
|                     | Rural               |            |                    | 1.15(1.01, 1.32)* | 1.25(1.03, 1.52)*  |
| Region              | Addis Ababa         |            |                    | 1                 | 1                  |

1  
2  
3  
4  
5  
6  
7  
8  
9  
10  
11  
12  
13  
14  
15  
16  
17  
18  
19  
20  
21  
22  
23  
24  
25  
26  
27  
28  
29  
30  
31  
32  
33  
34  
35  
36  
37  
38  
39  
40  
41  
42  
43  
44  
45  
46  
47  
48  
49  
50  
51  
52  
53  
54  
55  
56  
57  
58  
59  
60

|             |  |  |                     |                   |
|-------------|--|--|---------------------|-------------------|
| Tigray      |  |  | 1.20(0.96, 1.48)    | 1.04(0.80, 1.35)  |
| Afar        |  |  | 1.07(0.85, 1.34)    | 0.93(0.69, 1.24)  |
| Amhara      |  |  | 1.03(0.81, 1.31)    | 0.95(0.72, 1.26)  |
| Oromia      |  |  | 1.37(1.12, 1.68)**  | 1.08(0.81, 1.43)  |
| Somalia     |  |  | 1.03(0.68, 1.57)    | 1.17(0.81, 1.70)  |
| Benishangul |  |  | 1.21(0.97, 1.52)    | 1.19(0.89, 1.60)  |
| SNNPR       |  |  | 1.50(1.23, 1.84)*** | 1.46(1.02, 2.10)* |
| Gambella    |  |  | 1.39(1.11, 1.73)**  | 1.23(0.92, 1.65)  |
| Harari      |  |  | 0.97(0.79, 1.21)    | 0.80(0.65, 0.99)* |
| Dire Dawa   |  |  | 0.93(0.76, 1.15)    | 0.82(0.65, 1.05)  |

**Note:** P-value: \*  $p < 0.05$ ; \*\*  $p < 0.01$ ; \*\*\*  $p < 0.001$ , 1 = Reference category

**Figure 1 Mixed-effects AFT Weibull regression of time to first ANC visit by place of residence**

**Supplemental Table 1 Comparison of Mixed-effects AFT model with different baseline distributions**

1  
2  
3  
4  
5  
6  
7  
8  
9  
10  
11  
12  
13  
14  
15  
16  
17  
18  
19  
20  
21  
22  
23  
24  
25  
26  
27  
28  
29  
30  
31  
32  
33  
34  
35  
36  
37  
38  
39  
40  
41  
42  
43  
44  
45  
46  
47  
48  
49  
50  
51  
52  
53  
54  
55  
56  
57  
58  
59  
60

For peer review only

1  
2  
3  
4  
5  
6  
7  
8  
9  
10  
11  
12  
13  
14  
15  
16  
17  
18  
19  
20  
21  
22  
23  
24  
25  
26  
27  
28  
29  
30  
31  
32  
33  
34  
35  
36  
37  
38  
39  
40  
41  
42  
43  
44  
45  
46  
47  
48  
49  
50  
51  
52  
53  
54  
55  
56  
57  
58  
59  
60

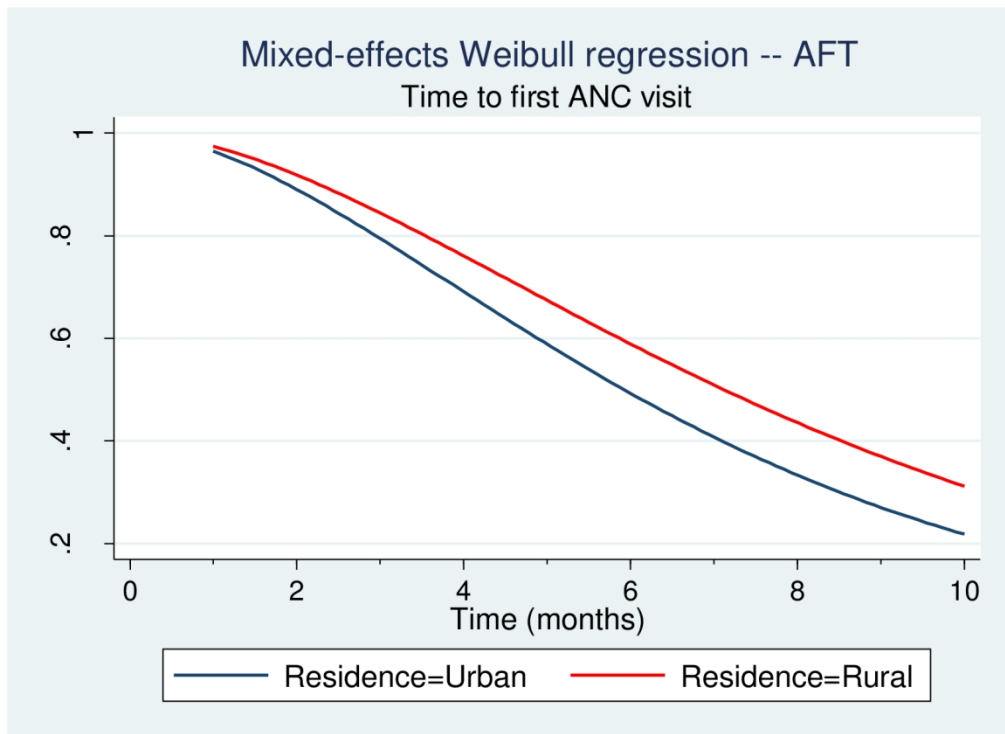

Figure 1 Mixed-effects AFT Weibull regression of time to first ANC visit by place of residence

139x101mm (300 x 300 DPI)

**Supplemental Table 1 Comparison of Mixed-effects AFT model with different baseline distributions**

| Model        | Parameters | -Log Likelihood value (Full) | DIC value | AIC value | BIC      |
|--------------|------------|------------------------------|-----------|-----------|----------|
| Exponential  | 26         | -2990.973                    | 5981.947  | 6033.947  | 6185.538 |
| Weibull      | 27         | -2010.789                    | 4021.578  | 4075.578  | 4232.999 |
| Log-normal   | 27         | -2771.332                    | 5542.664  | 5596.664  | 5754.086 |
| Log-logistic | 27         | -2797.825                    | 5595.650  | 5649.650  | 5807.071 |
| Gamma        | 27         | -2817.554                    | 5635.108  | 5689.108  | 5846.530 |



1  
2  
3  
4  
5  
6  
7  
8  
9  
10  
11  
12  
13  
14  
15  
16  
17  
18  
19  
20  
21  
22  
23  
24  
25  
26  
27  
28  
29  
30  
31  
32  
33  
34  
35  
36  
37  
38  
39  
40  
41  
42  
43  
44  
45  
46  
47  
48  
49  
50  
51  
52  
53  
54  
55  
56  
57  
58  
59  
60

## STROBE Statement—checklist of items that should be included in reports of observational studies

|                              | Item No | Recommendation                                                                                                                                                                                                                                                                                                                                                                                                                                                         | Page No |
|------------------------------|---------|------------------------------------------------------------------------------------------------------------------------------------------------------------------------------------------------------------------------------------------------------------------------------------------------------------------------------------------------------------------------------------------------------------------------------------------------------------------------|---------|
| <b>Title and abstract</b>    | 1       | (a) Indicate the study's design with a commonly used term in the title or the abstract                                                                                                                                                                                                                                                                                                                                                                                 | 1       |
|                              |         | (b) Provide in the abstract an informative and balanced summary of what was done and what was found                                                                                                                                                                                                                                                                                                                                                                    | 2       |
| <b>Introduction</b>          |         |                                                                                                                                                                                                                                                                                                                                                                                                                                                                        |         |
| Background/rationale         | 2       | Explain the scientific background and rationale for the investigation being reported                                                                                                                                                                                                                                                                                                                                                                                   | 3-5     |
| Objectives                   | 3       | State specific objectives, including any prespecified hypotheses                                                                                                                                                                                                                                                                                                                                                                                                       | 5       |
| <b>Methods</b>               |         |                                                                                                                                                                                                                                                                                                                                                                                                                                                                        |         |
| Study design                 | 4       | Present key elements of study design early in the paper                                                                                                                                                                                                                                                                                                                                                                                                                | 5-6     |
| Setting                      | 5       | Describe the setting, locations, and relevant dates, including periods of recruitment, exposure, follow-up, and data collection                                                                                                                                                                                                                                                                                                                                        | 5       |
| Participants                 | 6       | (a) <i>Cohort study</i> —Give the eligibility criteria, and the sources and methods of selection of participants. Describe methods of follow-up<br><i>Case-control study</i> —Give the eligibility criteria, and the sources and methods of case ascertainment and control selection. Give the rationale for the choice of cases and controls<br><i>Cross-sectional study</i> —Give the eligibility criteria, and the sources and methods of selection of participants | 6       |
|                              |         | (b) <i>Cohort study</i> —For matched studies, give matching criteria and number of exposed and unexposed<br><i>Case-control study</i> —For matched studies, give matching criteria and the number of controls per case                                                                                                                                                                                                                                                 |         |
| Variables                    | 7       | Clearly define all outcomes, exposures, predictors, potential confounders, and effect modifiers. Give diagnostic criteria, if applicable                                                                                                                                                                                                                                                                                                                               | 6-7     |
| Data sources/<br>measurement | 8*      | For each variable of interest, give sources of data and details of methods of assessment (measurement). Describe comparability of assessment methods if there is more than one group                                                                                                                                                                                                                                                                                   | 5-8     |
| Bias                         | 9       | Describe any efforts to address potential sources of bias                                                                                                                                                                                                                                                                                                                                                                                                              |         |
| Study size                   | 10      | Explain how the study size was arrived at                                                                                                                                                                                                                                                                                                                                                                                                                              | 5-6     |
| Quantitative variables       | 11      | Explain how quantitative variables were handled in the analyses. If applicable, describe which groupings were chosen and why                                                                                                                                                                                                                                                                                                                                           | 7-9     |
| Statistical methods          | 12      | (a) Describe all statistical methods, including those used to control for confounding                                                                                                                                                                                                                                                                                                                                                                                  | 8-10    |
|                              |         | (b) Describe any methods used to examine subgroups and interactions                                                                                                                                                                                                                                                                                                                                                                                                    | 8       |
|                              |         | (c) Explain how missing data were addressed                                                                                                                                                                                                                                                                                                                                                                                                                            |         |
|                              |         | (d) <i>Cohort study</i> —If applicable, explain how loss to follow-up was addressed<br><i>Case-control study</i> —If applicable, explain how matching of cases and controls was addressed<br><i>Cross-sectional study</i> —If applicable, describe analytical methods taking account of sampling strategy                                                                                                                                                              |         |
|                              |         | (e) Describe any sensitivity analyses                                                                                                                                                                                                                                                                                                                                                                                                                                  |         |

Continued on next page

| <b>Results</b>           |     |                                                                                                                                                                                                                                                                                                                                                                                                               |       |
|--------------------------|-----|---------------------------------------------------------------------------------------------------------------------------------------------------------------------------------------------------------------------------------------------------------------------------------------------------------------------------------------------------------------------------------------------------------------|-------|
| Participants             | 13* | (a) Report numbers of individuals at each stage of study—eg numbers potentially eligible, examined for eligibility, confirmed eligible, included in the study, completing follow-up, and analysed<br>(b) Give reasons for non-participation at each stage<br>(c) Consider use of a flow diagram                                                                                                               | 10-11 |
| Descriptive data         | 14* | (a) Give characteristics of study participants (eg demographic, clinical, social) and information on exposures and potential confounders<br>(b) Indicate number of participants with missing data for each variable of interest<br>(c) <i>Cohort study</i> —Summarise follow-up time (eg, average and total amount)                                                                                           | 10-11 |
| Outcome data             | 15* | <i>Cohort study</i> —Report numbers of outcome events or summary measures over time<br><i>Case-control study</i> —Report numbers in each exposure category, or summary measures of exposure<br><i>Cross-sectional study</i> —Report numbers of outcome events or summary measures                                                                                                                             | 10    |
| Main results             | 16  | (a) Give unadjusted estimates and, if applicable, confounder-adjusted estimates and their precision (eg, 95% confidence interval). Make clear which confounders were adjusted for and why they were included<br>(b) Report category boundaries when continuous variables were categorized<br>(c) If relevant, consider translating estimates of relative risk into absolute risk for a meaningful time period | 13    |
| Other analyses           | 17  | Report other analyses done—eg analyses of subgroups and interactions, and sensitivity analyses                                                                                                                                                                                                                                                                                                                |       |
| <b>Discussion</b>        |     |                                                                                                                                                                                                                                                                                                                                                                                                               |       |
| Key results              | 18  | Summarise key results with reference to study objectives                                                                                                                                                                                                                                                                                                                                                      | 13    |
| Limitations              | 19  | Discuss limitations of the study, taking into account sources of potential bias or imprecision. Discuss both direction and magnitude of any potential bias                                                                                                                                                                                                                                                    | 18    |
| Interpretation           | 20  | Give a cautious overall interpretation of results considering objectives, limitations, multiplicity of analyses, results from similar studies, and other relevant evidence                                                                                                                                                                                                                                    | 14-17 |
| Generalisability         | 21  | Discuss the generalisability (external validity) of the study results                                                                                                                                                                                                                                                                                                                                         | 18    |
| <b>Other information</b> |     |                                                                                                                                                                                                                                                                                                                                                                                                               |       |
| Funding                  | 22  | Give the source of funding and the role of the funders for the present study and, if applicable, for the original study on which the present article is based                                                                                                                                                                                                                                                 | 19    |

\*Give information separately for cases and controls in case-control studies and, if applicable, for exposed and unexposed groups in cohort and cross-sectional studies.

**Note:** An Explanation and Elaboration article discusses each checklist item and gives methodological background and published examples of transparent reporting. The STROBE checklist is best used in conjunction with this article (freely available on the Web sites of PLoS Medicine at <http://www.plosmedicine.org/>, Annals of Internal Medicine at <http://www.annals.org/>, and Epidemiology at <http://www.epidem.com/>). Information on the STROBE Initiative is available at [www.strobe-statement.org](http://www.strobe-statement.org).

# BMJ Open

## Time to initiation of antenatal care and its predictors among pregnant women in Ethiopia: Multilevel Mixed-effects Acceleration Failure Time model

|                                 |                                                                                                                                                                                                                                                                                                          |
|---------------------------------|----------------------------------------------------------------------------------------------------------------------------------------------------------------------------------------------------------------------------------------------------------------------------------------------------------|
| Journal:                        | <i>BMJ Open</i>                                                                                                                                                                                                                                                                                          |
| Manuscript ID                   | bmjopen-2023-075965.R2                                                                                                                                                                                                                                                                                   |
| Article Type:                   | Original research                                                                                                                                                                                                                                                                                        |
| Date Submitted by the Author:   | 02-Feb-2024                                                                                                                                                                                                                                                                                              |
| Complete List of Authors:       | Oyato, Befekadu; Salale University, Midwifery<br>Abasimel , Husen; Salale University, Midwifery<br>Tufa, Derara Girma; Salale University, Public Health<br>Israel, Hana; Jimma University, Midwifery<br>Getachew, Tewodros; Hawassa University, Midwifery<br>Awol, Mukemil; Salale University, Midwifery |
| <b>Primary Subject Heading</b>: | Obstetrics and gynaecology                                                                                                                                                                                                                                                                               |
| Secondary Subject Heading:      | Research methods                                                                                                                                                                                                                                                                                         |
| Keywords:                       | OBSTETRICS, PUBLIC HEALTH, STATISTICS & RESEARCH METHODS, Pregnant Women, Prenatal diagnosis < OBSTETRICS                                                                                                                                                                                                |
|                                 |                                                                                                                                                                                                                                                                                                          |

SCHOLARONE™  
Manuscripts



I, the Submitting Author has the right to grant and does grant on behalf of all authors of the Work (as defined in the below author licence), an exclusive licence and/or a non-exclusive licence for contributions from authors who are: i) UK Crown employees; ii) where BMJ has agreed a CC-BY licence shall apply, and/or iii) in accordance with the terms applicable for US Federal Government officers or employees acting as part of their official duties; on a worldwide, perpetual, irrevocable, royalty-free basis to BMJ Publishing Group Ltd ("BMJ") its licensees and where the relevant Journal is co-owned by BMJ to the co-owners of the Journal, to publish the Work in this journal and any other BMJ products and to exploit all rights, as set out in our [licence](#).

The Submitting Author accepts and understands that any supply made under these terms is made by BMJ to the Submitting Author unless you are acting as an employee on behalf of your employer or a postgraduate student of an affiliated institution which is paying any applicable article publishing charge ("APC") for Open Access articles. Where the Submitting Author wishes to make the Work available on an Open Access basis (and intends to pay the relevant APC), the terms of reuse of such Open Access shall be governed by a Creative Commons licence – details of these licences and which [Creative Commons](#) licence will apply to this Work are set out in our licence referred to above.

Other than as permitted in any relevant BMJ Author's Self Archiving Policies, I confirm this Work has not been accepted for publication elsewhere, is not being considered for publication elsewhere and does not duplicate material already published. I confirm all authors consent to publication of this Work and authorise the granting of this licence.

1  
2  
3 **Time to initiation of antenatal care and its predictors among pregnant women**  
4 **in Ethiopia: Multilevel Mixed-effects Acceleration Failure Time model**  
5  
6

7 Befekadu Tesfaye **Oyato**<sup>1</sup>, Husen Zakir **Abasimel**<sup>1\*</sup>, Derara Girma **Tufa**<sup>2</sup>, Hana **Israel**<sup>3</sup>, Tewodros  
8 **Getachew**<sup>4</sup>, Mukemil **Awol**<sup>1</sup>  
9

10 <sup>1</sup>Department of Midwifery, College of Health Sciences, Salale University, Fitcha, Ethiopia

11 <sup>2</sup>Department of Public health, College of Health Sciences, Salale University, Fitcha, Ethiopia

12 <sup>3</sup>Department of Midwifery, Institute of Health Sciences, Jimma University, Jimma, Ethiopia

13 <sup>4</sup>Department of Midwifery, College of Health Sciences, Hawassa University, Hawassa, Ethiopia  
14  
15  
16  
17  
18

19 Corresponding Authors: Husen Zakir **Abasimel** (HZA)

20 E-mail: [husniselam@gmail.com](mailto:husniselam@gmail.com)

21 Telephone: +251910331766  
22  
23  
24  
25  
26  
27  
28  
29  
30  
31  
32  
33  
34  
35  
36  
37  
38  
39  
40  
41  
42  
43  
44  
45  
46  
47  
48  
49  
50  
51  
52  
53  
54  
55  
56  
57  
58  
59  
60

## Abstract

**Objective:** To assess the time-to-initiation of antenatal care and its predictors among pregnant women in Ethiopia.

**Design:** Retrospective follow-up study using secondary data from the 2019 Ethiopian mini demographic and health survey.

**Setting and participants:** 2933 women aged 15 to 49 who had ANC visit during their current or most recent pregnancy within the five years prior to the survey were included in this study. Women who attended prenatal appointments but whose gestational age was unknown at the first prenatal visit were excluded from the study.

**Outcome measures:** Participants were interviewed to respond the gestational age in months at which they made the first antenatal care visit. Multivariable Mixed-effects survival regression was fitted to identify factors associated with the time-to-initiation of ANC.

**Results:** In this study, the estimated mean survival time of pregnant women to initiate the first ANC visit in Ethiopia was found to be 6.8 months (95% CI: 6.68, 6.95). Women whose last birth was a caesarean section (AAF = 0.75; 95% CI: 0.61, 0.93), and women with higher education (AAF = 0.69; 95% CI: 0.50, 0.95) had a shorter time to initiate ANC early in the first trimester of pregnancy. However, being grand multiparous (AAF = 1.31; 95% CI: 1.05, 1.63), being previously in a union (AAF = 1.47; 95% CI: 1.07, 2.00), having a home birth (AFT = 1.35; 95% CI: 1.13, 1.61), and living in a rural area (AAF = 1.25; 95% CI: 1.03, 1.52) were the impediments for early ANC initiation.

**Conclusion:** Women in this study area sought their initial antenatal care far later than the WHO recommended. Therefore, healthcare providers should collaborate with community health workers to provide home-based care in order to encourage prompt ANC among hard-to-reach populations, such as rural residents and those giving birth at home.

## Strength and limitations of this study

- ◆ This study used a large, nationally representative sample from Ethiopian survey data.
- ◆ This study evaluated community- and individual-level factors related to the survival time to initiation of ANC visit using a robust model.
- ◆ Many factors that could affect the timing of the first ANC visit were not taken into account in this study because they were not present in the original data.
- ◆ Social desirability bias is likely to arise because the data were collected through self-reported interviews with participants.

## Introduction

A healthy pregnancy for both mother and child, a smooth transition to a happy labor and delivery experience, and successful parenthood are all aspects of the positive pregnancy experience that women want and need.<sup>(1)</sup> However, the morbidity and mortality rates associated with pregnancy that are preventable are still too high at the outset of the Sustainable Development Goals (SDG) period. In order to improve the pregnancy's outcome, antenatal care (ANC) is a crucial time for health promotion, screening, and disease prevention.<sup>(2)</sup> For multidisciplinary care providers, the early antenatal care visit is the best opportunity to intervene with health promotion activities and establish a baseline knowledge of the pregnant woman's pre-existing medical conditions.<sup>(3)</sup>

Early detection of modifiable risk factors and pre-existing conditions was made possible by timely prenatal care initiation, which is defined as the first antenatal contact made during the first trimester of pregnancy.<sup>(4)</sup> The 2016 World Health Organization (WHO) recommendation also suggests an early beginning of ANC within the first 12 weeks of gestation.<sup>(2)</sup> Women with early ANC initiation are more likely to have a sufficient number of antenatal care contacts.<sup>(5)</sup> A study from low and middle-income countries has shown that receiving early ANC is associated with a higher likelihood of having an eight-plus ANC visit.<sup>(6)</sup> According to a Pakistani study, women who had their first ANC checkup within three months of being pregnant were more likely to obtain WHO-recommended services during their pregnancy, indicating that the timing of the checkup is a strong predictor of the content of services.<sup>(7)</sup>

There has been a significant improvement in the estimated global coverage of early prenatal care visits, going from 40.9% in 1990 to 84.8% in 2013, or a 43.3% increase.<sup>(4)</sup> The estimated coverage

1  
2  
3 of early prenatal care visits in low-income countries (LMICs) in 2013 was 24 percent, compared  
4 to 81 percent in high-income countries.(4) Data from these nations' Demographic Health Surveys  
5 (DHS) from 2012 to 2018 show that this percentage has climbed to 44.3%.(5) Yet, this shows that  
6 the rate of early initiation of ANC in the LMICs is very far from the optimal level.  
7  
8  
9

10  
11 A woman dies every two minutes due to pregnancy or childbirth, according to United Nations  
12 (UN) estimates.(8) The poorest nations and those experiencing conflict continue to have the  
13 highest rates of maternal fatalities. With 3.6% of all maternal deaths worldwide in 2020, Ethiopia  
14 had the fourth-highest estimated number of maternal deaths, behind the Democratic Republic of  
15 the Congo, Nigeria, and India.(8) Timely ANC initiation is essential to lowering maternal  
16 morbidity and mortality in countries with high rates of maternal morbidity and mortality.(9)  
17  
18  
19  
20  
21

22  
23 The magnitude of timely initiation of ANC visits in Sub-Saharan Africa was 38.0%, ranging from  
24 14.5% in Mozambique to 68.6% in Liberia.(10) In Ethiopia, being one of the SSA countries, the  
25 problem is even worse. The median time to antenatal care initiation in the country was found to be  
26 5 months.(11) The result from the 2016 Ethiopian Demographic Health Survey (EDHS) revealed  
27 only 20% of pregnant women in Ethiopia start their ANC during the first trimester of their  
28 pregnancy.(12) Other studies in the country reported varying magnitudes of early initiation of  
29 ANC; the proportion was found to be 46.8% in Bahirdar,(13) 21.71% in southern Ethiopia,(14)  
30 40.6% in Debre Markos,(15) 39.5% in Tselemt district of Tigray Region,(16) 27.5% in Axum,(17)  
31 28.8% in Ilu-Ababor,(18) and 34% in Bench-Sheko zone.(19)  
32  
33  
34  
35  
36  
37

38  
39 Predictors of timing of first antenatal care follow-up from different literatures were  
40 residence,(10,12,20) household wealth,(10,21) educational status of the women,(10,11,17) media  
41 exposure,(10,11,20) occupation of the women,(22–24) parity,(11,25,26) husband  
42 education,(20,21) husband occupation,(20) distance from health facility,(10,26) and maternal  
43 age.(10,21,27)  
44  
45  
46  
47

48  
49 Despite various studies on identifying risk factors for time to first ANC follow-up conducted in  
50 Ethiopia, only a few studies were found to be representative at the national level. Furthermore,  
51 almost all of the studies failed to consider community-level factors for the time to the initiation of  
52 ANC in Ethiopia. Updated and nationally representative information is very crucial for  
53 policymakers and other concerned bodies to improve the level of early antenatal care initiation.  
54  
55  
56  
57  
58  
59  
60



1  
2  
3 Respecting women's rights and providing them with early prenatal care is the first step in a lifetime  
4 of care that will improve both the mother and child's health.(3) Therefore, this study undertook a  
5 retrospective analysis based on the 2019 Ethiopian Mini Demographic and Health survey  
6 (EMDHS) data set, to identify time-to-initiation of ANC and its predictors in Ethiopia.  
7  
8  
9

## 10 **Methods**

### 11 **Study design and area**

12  
13 This study undertook a retrospective analysis based on the 2019 Ethiopian Mini Demographic and  
14 Health Survey (EMDHS) data set. Ethiopia is located in the Horn of Africa and shares a border  
15 with Eritrea, Djibouti, Somalia, Sudan, South Sudan, and Kenya. It has a population number of  
16 over 110 million people putting it second in Africa.(28) The 2021 World Bank report indicated  
17 that, Ethiopia had a gross national income per capita of US\$ 940.(29)  
18  
19  
20  
21  
22  
23

### 24 **Data source and sampling procedure**

25  
26 Data from the 2019 Ethiopian Mini Demographic and Health Survey (EMDHS) were used in this  
27 study. The data were supplied once the Measure DHS website (<http://www.measuredhs.com>)  
28 was contacted online and the goal of the study was explained. (30) The variables included in this  
29 study were found in the under-five children's file (KR) and individual women's files (EMDHS  
30 2019). Interviews with permanent residents and guests who had been in the dwellings the day  
31 before the survey were done in person with the 2019 EMDHS sample, which had been stratified  
32 and selected in two steps. (30) A composite of all census enumeration areas (EAs) made for the  
33 2019 Ethiopia Population and Housing Census (PHC), which will be conducted by the Central  
34 Statistical Agency (CSA), is the 2019 EMDHS sample frame. The whole list of 149,093 EAs  
35 prepared for the 2019 PHC is included in the census frame. A geographic area of 131 households  
36 on average is called an EA. The location of the EA, the kind of dwelling (rural or urban), and the  
37 approximate number of residential households are all included in the sampling frame.(30)  
38  
39  
40  
41  
42  
43  
44  
45  
46  
47

### 48 **Study population**

49 All women aged 15 to 49 who had ANC during their current or most recent pregnancy within the  
50 five years prior to the survey were included in this study. Women who attended prenatal  
51 appointments but whose gestational age was unknown at the first prenatal visit were excluded from  
52  
53  
54  
55  
56  
57  
58  
59  
60

1  
2  
3 the study. A total of 2933 women aged 15 to 49 who had ANC visits during their current or most  
4 recent pregnancy were therefore analyzed in this study.  
5  
6

## 7 **Study variables**

### 8 **Outcome of interest**

9  
10 The time in months that pregnant women take to receive ANC for the first time is the dependent  
11 variable. The event of interest considered as success (event = 1) if women had antenatal care in  
12 the first trimester of pregnancy and otherwise censored (censored = 0).  
13  
14  
15

### 16 **Independent variable**

17  
18 **Individual level factors** Women's education level, marital status, birth interval, number of  
19 prenatal care visits, age, and exposure to the media were all individual-level factors.  
20  
21

22 **Community-level factors** were home, area, educational attainment in the community, ANC  
23 coverage in the community, and poverty of the community. The only information the EMDHS  
24 gathered about the clusters' characteristics was their area and place of residence. Consequently,  
25 by combining our interest in a cluster with the individual traits, more shared community-level  
26 data were produced. The percentage of a given variable's subcategory that we were interested in  
27 within a specific cluster was used to calculate the aggregates. Due to the non-normal distribution  
28 of the total generated variable value. The national median values were used to group it into  
29 categories.  
30  
31  
32  
33  
34  
35  
36

37 The aggregates were created using the percentage of a variable's subcategory in a specific  
38 cluster. Due to the non-normal distribution of the aggregate value for all newly produced  
39 variables, it was divided into two groups (low and high proportions) according to their median  
40 values. The percentage of women in the cluster with secondary or higher education is used to  
41 gauge the level of education among women in the community. The percentage of women in the  
42 cluster's bottom two household wealth quantiles—the poorer and the poorest—was used to  
43 define poverty at the community level. The community's use of ANC was determined by looking  
44 at the proportion of women in a cluster who use it. Residence location and region were used in  
45 the EMDHS data collection according to their classifications.  
46  
47  
48  
49  
50  
51

### 52 **Operational definition**

53  
54 **Exposure to mass media:** defined as the frequency of watching television and listening to the  
55 radio, excluding exposure to magazines and newspapers. Women who were exposed to radio or  
56  
57  
58  
59  
60

1  
2  
3 television at least once a week were classified as exposed, whereas those who were not exposed at  
4 all were classified as not exposed.

5  
6 **Community women's education:** The percentage of mothers in the cluster who completed their  
7 elementary, secondary, or tertiary education. The aggregate of primary, secondary, or post-  
8 secondary education that each mother has completed can be used to determine the general level  
9 of education among the women in the cluster. This variable was split into two groups based on  
10 the national median value: a low percentage cluster and a high proportion cluster.  
11  
12  
13  
14  
15

16 **Antenatal care utilization:** was defined as mothers who had visited a prenatal care at least four  
17 times. (2)  
18  
19

20 **Community antenatal coverage:** the percentage of women within the clusters who received  
21 four or more prenatal visits (ANC) from a qualified practitioner before their most recent  
22 delivery.  
23  
24

25 **Community poverty status:** It is defined as the percentage the clusters' poor or poorest  
26 mothers.  
27  
28

### 29 **Data Quality Control and Assurance**

30 The data sets for the original work were collected by face-to-face interviewing women using  
31 structured questionnaires that met the eligibility criteria. The woman's questionnaire, the  
32 household questionnaire, and the Health Facility Questionnaire were employed to gather  
33 essential information. After the questionnaires were finalized in English, they were translated  
34 into Amharic, Tigrigna, and Afaan Oromo. To maintain consistency, the collected data was also  
35 back-translated into English. The quality of the dataset has maintained by testing its  
36 completeness. Additionally, interviewers were trained to preserve the original data set's quality,  
37 and they recorded interviewee responses on tablet computers.  
38  
39  
40  
41  
42  
43  
44

45 For this study, the data were weighted using sampling weight before any statistical analysis to  
46 restore the representativeness of the data and to get a reliable estimate and standard error. The  
47 weighted results from the analysis were reported in the study. Multicollinearity between  
48 independent variables was checked using Variance Inflation Factor (VIF) and the mean VIF was  
49 2.11. The proportional hazards (PH) assumption was tested using Scaled Schoenfeld residuals and  
50 found to be unsatisfied, with a global test value of 0.0001. The data was also assessed for an  
51 interaction factor.  
52  
53  
54  
55  
56  
57  
58  
59  
60

## Data Management and Analysis

STATA version 14 software was used for cleaning, recoding, and analyzing the data. Descriptive statistics were applied using frequencies and percentages. The Kaplan-Meier survival curve was used to estimate the probability of survival. Survival curves were compared by log-rank test. Univariable survival regression was fitted for explanatory variables and those having p-value  $\leq 0.25$  level of significance were considered for the multivariable analysis. Then, the study applied a stepwise backward variable selection procedure to obtain the final reduced model. The proportional hazards (PH) assumption was tested using Scaled Schoenfeld residuals and found to be unsatisfied, with a global test value of 0.0001. A multivariable mixed-effects parametric survival regression model of the Weibull distribution was then fitted. Adjusted Acceleration Factor (AAF) or Time ratio with its 95% confidence interval (CI) was applied, and covariates with a P-value  $< 0.05$  in the multivariable analysis were considered determinants of the survival time to first ANC visit.

### Survival analysis

Survival analysis deals with the analysis of survival data, which is used to measure the time to an event of interest, such as death or failure.<sup>(31)</sup> The Cox proportional hazard model is one of the most widely used regression model types in survival analysis. The Cox model estimates the hazard ratio, which is always a nonnegative value. The primary attribute of the Cox model is its reliance on the proportional hazards assumption, which states that "coefficients of the hazard function must remain constant across time for a given covariate".<sup>(31)</sup>

### Parametric acceleration failure time model

An acceleration failure time model (AFT) is a parametric model in the statistical field of survival analysis that offers an alternative to the often used PH models. The primary distinction between Cox model and AFT is that the baseline hazard function is supposed to follow a specific distribution in AFT models. Covariate multiplies the hazard by a constant in a PH model, while it accelerates or decelerates a failure status's life cycle (initiation, discontinuation, disease, death or recovery) by a constant in an AFT model.<sup>(32)</sup>

Accelerated Failure Time (AFT) model is a model used for adjusting survivor functions for the effects of covariates. The AFT parameterization expresses the natural logarithm of the survival time,  $\log t$ , as a linear function of the covariates. <sup>(31)</sup>

$$\log(t_j) = X_j\beta + Z_ju_j + v_j \dots \dots \dots 1$$

for  $j = 1, \dots, M$  clusters with cluster  $j$  consisting of  $i = 1, \dots, n_j$  observations. The vector  $x_{ji}$  contains the covariates for the fixed effects, with regression coefficients (fixed effect)  $\beta$ . The vector  $z_{ji}$  contains the covariates corresponding to the random effects  $u_j$ .  $v_{ji}$  are observation-level errors with density  $\phi(\cdot)$ . The distributional form of the error term determines the regression model. Five regression models are implemented in *mestreg* using the AFT parameterization: exponential, gamma, loglogistic, lognormal, and Weibull. As a result, this study applied a random-effects Weibull model with normally distributed random effects. This model can be described as a shared frailty model with lognormal frailty.

### Mixed-effects parametric survival analysis

The EMDHS employed a multistage cluster sampling technique in which data were hierarchical (pregnant women were nested within families, and households inside clusters).

Considering the hierarchical nature of EMDHS data, pregnant women who lived within the same cluster may have had similar characteristics compared to those who reside in other clusters of the Country. Therefore, a two-stage multivariable mixed-effects parametric survival regression analysis was employed to estimate the effects of individual and community level predictors on the survival time to first ANC visit. Mixed-effects survival models contain both fixed effects and random effects.

Four models were fitted to identify community and individual level factors associated with survival time to first ANC visit. The first model (Model 1, or the empty model) had no explanatory variables. The second model (Model 2) examined the individual-level effect by focusing solely on individual-level factors. The third model (Model 3) evaluated solely the community-level variables to examine the effect of community-level characteristics on the survival time to the first ANC visit, independent of other factors.

The fixed effect sizes of individual and community-level determinants of the survival time to first ANC visit were expressed as AAFs with 95% CI. The P-value  $<0.05$  has been considered as statistically significant. Additionally, the measure of variance (random effects) was reported in terms of the intraclass correlation coefficient (ICC), median acceleration factor (MAF), and proportional change in variance (PCV). Model fitness was checked using Akaike Information

Criteria (AIC) and Deviance Information Criteria (DIC). The lowest AIC and DIC values declare the best fit model.(31)

## Patient and public involvement

Women in their reproductive years who had ANC during their current or most recent pregnancy within the five years prior to the survey took part in this study and contributed vital data. However, they never participated in conducting the study, designing the protocol or instruments used to gather the study's data, reporting the findings, or distributing them.

## Result

### Descriptive statistics

Weighted samples of 2924 women were followed for a minimum of 1 and a maximum of 10 months with an average follow up time of 4 months. In this study, timely initiation of ANC visit in Ethiopia was found to be 42.7% (95% CI: 41.0 – 44.6). The estimated mean (restricted) survival time of pregnant women to initiate the first ANC visit was 6.8 months (95% CI: 6.68, 6.95). The overall incidence rate was approximately 11 per 100 person month of observation. Majority 2755 (94.2%) of women were currently married or in union, and of these 1030 (37.4%) had initiated ANC visit early in the first trimester of pregnancy. Regarding women education, 1283 (43.9%) women had no education, and among these 404(31.5%) initiated their ANC visit timely. Access to media was reported by 1259(43.1%) of whom 582(46.2%) had started ANC visit within 12 weeks of pregnancy. More than half 114(58.5%) of women who gave birth by C/S started their first ANC visit within the first trimester (Table 1 Summary of individual and community level factors of time to ANC initiation among study participants (2924), 2022).

Most 2052(70.2%) of the women were rural residents, and among these only 647(31.5%) women initiated ANC visit within the recommended time. The proportion of women starting first ANC visit within the first trimester was higher in Harari (66.7%), Dire Dawa (66.7%) and Addis Ababa (65%), whereas lower in the SNNPR (28.8%), Oromia (33.2%) and Somali (33.3%) regional states. More than half 1577(53.9) of the women were from a community with a low poor proportion of whom 740(46.9%) commenced their first ANC visit in the first three months of pregnancy. Moreover, 353(26.2%) women from a community with a high poor proportion commenced their

1  
2  
3 first ANC visit timely (Table 1 Summary of individual and community level factors of time to  
4 ANC initiation among study participants (2924), 2022).

### 5 6 7 **Comparison of the different covariate in terms of survival time to first ANC visit**

8  
9 Kaplan Meier graphs are generated to observe the difference in the survival time to first ANC visit  
10 of women for different categorical variables. The log-rank test was carried out to validate the  
11 difference between the groups of each categorical variable. The log-rank test result (Table 2) shows  
12 that there is statistically significant difference in the survival experience of groups among women  
13 education level ( $p < 0.0001$ ), wealth index ( $p < 0.0001$ ), delivery place ( $p < 0.0001$ ), parity ( $p <$   
14  $0.0001$ ), media access ( $p < 0.0001$ ), region ( $p < 0.0001$ ), women age ( $p < 0.001$ ) and Marital status  
15 ( $p < 0.2$ ) (Table 2 Comparison of survival time of individual and community level factors of time  
16 to ANC initiation among study participants (2924), 2022).

### 17 18 19 **Random effects and model comparison**

20  
21 As the multilevel mixed-effects Weibull survival regression analysis results described in Table 3,  
22 Model I revealed statistically significant variation in the survival time to first ANC visit of women  
23 across communities. Nearly One fifth of the variation in the survival time is attributed to  
24 community-level factors (ICC = 18.9%). After adjusting the model for individual-level factors  
25 (Model II), about 32.4% of the variation in the accelerations of survival time was attributed to the  
26 individual level factors (PCV = 32.4%), and 13.6% of the variance in the survival time was  
27 attributed to community-level factors (ICC = 13.6%). Model III, which was adjusted for  
28 community-level factors, revealed that the community level factors explained 4.12% of the  
29 variability in the accelerations of survival time to first ANC visit of women (PCV = 4.12%), and  
30 13.1% of the variation among the clusters was attributed to community-level factors (ICC =  
31 13.1%) (Table 3 Measures of variation and model fit statistics for time to first ANC visit among  
32 women in Ethiopia, 2023).

33  
34 The final best-fit model (model IV) was adjusted for both individual and community-level factors  
35 simultaneously. In this final model (model IV), as indicated by the PCV, 16.1% of the variation in  
36 the survival time across communities was explained by both individual and community-level  
37 factors. Including both individual- and community-level factors reduced the unexplained  
38 heterogeneity in the time to first ANC visit between communities from MAF of 2.31 in the null  
39 model to the MAF of 1.85 in the final model, which equals 0.46. This showed that the survival  
40  
41  
42  
43  
44  
45  
46  
47  
48  
49  
50  
51  
52  
53  
54  
55  
56  
57  
58  
59  
60

1  
2  
3 time to first ANC visit reduced by 54% when a woman moved from high risk to low-risk  
4 neighborhoods (Table 3 Measures of variation and model fit statistics for time to first ANC visit  
5 among women in Ethiopia, 2023).  
6  
7

8  
9 Based on the AIC and DIC, Multilevel mixed-effects Weibull survival model (Model IV) was  
10 found the best model to fit the data with a minimum AIC and DIC values of 4075.578 and  
11 4021.578, respectively ""Supplemental Table 1"".  
12  
13

14  
15 The survival plot in **Error! Reference source not found.** shows that the survivor function for  
16 rural women is above the survivor function for urban women. This implies that rural women have  
17 a greater probability of not initiating an ANC visit at earlier gestational age (**Error! Reference  
18 source not found.**).  
19  
20  
21

### 22 23 **Interpretation of the multilevel Weibull model results**

24  
25 The results of multivariable multilevel parametric Weibull survival analysis of predictors of the  
26 survival time to first ANC visit is provided in Table 4 (Table 4 Mixed-effects Weibull AFT  
27 survival regression of time to first ANC visit among women in Ethiopia, 2023). The place of  
28 delivery was found to have a significant effect on the time to ANC initiation. Home delivered  
29 mothers have a 35% (AAF = 1.35; 95% CI: 1.13, 1.61) longer survival time to start a first ANC  
30 visit. In other words, home-delivered mothers were less likely to initiate their first ANC visit within  
31 the first trimester of pregnancy compared to women who gave birth at a health facility. Similarly,  
32 Grand multiparous women have a 31% longer time to start ANC early in the first trimester than  
33 primipara women. The acceleration factor for Grand multiparous women was 1.31 (95% CI: 1.05,  
34 1.63).  
35  
36  
37  
38  
39  
40  
41

42  
43 Women with higher education had a 31% shorter time to start their first ANC visit than those who  
44 were not educated (AAF = 0.69; 95% CI: 0.50, 0.95). This indicates that women with higher  
45 education are more likely to initiate their first ANC visit in the first 12 weeks of pregnancy than  
46 women with no formal education. Similarly, women whose last birth was caesarean section had a  
47 25% shorter time to initiate ANC early in the first trimester as compared to those who delivered  
48 vaginally (AAF = 0.75; 95% CI: 0.61, 0.93) (Table 4 Mixed-effects Weibull AFT survival  
49 regression of time to first ANC visit among women in Ethiopia, 2023).  
50  
51  
52  
53  
54  
55  
56  
57  
58  
59  
60



1  
2  
3 Formerly married or in union women took 1.47 times longer (AAF = 1.47; 95% CI: 1.07, 2.00) to  
4 schedule their first antenatal care visit early in pregnancy. It can be stated that women who had  
5 previously been in unions were less likely to begin their ANC visit early in the first three months  
6 of pregnancy than women who were currently in unions (Table 4 Mixed-effects Weibull AFT  
7 survival regression of time to first ANC visit among women in Ethiopia, 2023).  
8  
9

10  
11  
12 The survival time until the first ANC visit was found to be significantly influenced by one's place  
13 of residence. Compared to women from urban residences, those from rural ones took 1.25 times  
14 longer to begin their first ANC visit early in pregnancy (AAF = 1.25; 95% CI: 1.03, 1.52). In other  
15 words, compared to women who lived in urban areas, women who live in rural areas had a lower  
16 likelihood of scheduling their first ANC visit during the first 12 weeks of pregnancy.  
17 Administrative region was also a significant predictor of time to first ANC visit (Table 4 Mixed-  
18 effects Weibull AFT survival regression of time to first ANC visit among women in Ethiopia,  
19 2023).  
20  
21  
22  
23  
24  
25

## 26 27 Discussion

28  
29  
30 In this study, Ethiopian pregnant women's time-to-initiation of ANC and its predictors were  
31 evaluated. Pregnant women's mean survival time to schedule their first ANC check was thus 6.8  
32 months (95% CI: 6.68, 6.95). Furthermore, the time-to-initiation of ANC was significantly  
33 associated with factors such as women's educational attainment, prior cesarean birth, parity,  
34 marital status, place of delivery, place of residency, and region of residency.  
35  
36  
37  
38  
39

40 The mean survival time of pregnant women to initiate ANC visit in this study was significantly  
41 higher than a study done in India in which the reported median survival time to first ANC visit  
42 was 4 months. (33) The finding of this study is also slightly higher than the study finding from  
43 Nigeria in which the median survival time for the first ANC checkup was found to be 6 months.(34)  
44 Moreover, this finding is higher when compared to the recent findings of average of 3.4 gestational  
45 months before initiation of ANC visit in Ghana.(27) However, late initiation of ANC visit has been  
46 previously reported in Ethiopia with a median survival time of 7 months.(35)  
47  
48  
49  
50  
51  
52

53 Timely initiation of ANC visit within the first three months of pregnancy in Ethiopia was found to  
54 be 42.7% (95% CI: 41.0, 44.6). This finding is lower than the study conducted in Pakistan which  
55  
56  
57  
58  
59  
60

1  
2  
3 indicated that nearly half of women (48%) received ANC within 3 months of pregnancy.(7) This  
4 finding is significantly higher than studies done in Tanzania,(36) Benin,(37) Kenya,(38) and  
5 Nigeria,(34) but lower compared to a study from Ghana, where first trimester initiation of ANC  
6 visit was reported to be as high as 57%.(27) This result is higher than the previous study conducted  
7 in Ethiopia that reported timely initiation of ANC visit of 38.6%.(35)  
8  
9

10  
11  
12 Women who had higher education had a 31% shortened time to start first ANC visit than those  
13 with no formal education. This finding is in agreement with findings of previous studies.  
14 (11,33,39) A study conducted in India revealed that women with higher education had a 2.8 times  
15 shorter time to initiation of ANC in the first trimester of pregnancy compared to women having  
16 no formal education.(33) Similarly, in Nepal, women with higher level education were  
17 significantly more likely to initiate ANC early compared to women who had no education.(39) A  
18 multi-country analysis of DHS in SSA found that the odd of timely initiation of ANC was higher  
19 in mothers who had higher level of education compared to women who had no formal  
20 education.(10) A study from Nigeria revealed that women with higher education were more likely  
21 to start first ANC visit early compared to uneducated women.(34) A retrospective study from  
22 Ethiopia revealed that early initiation of ANC increases as the women's level of education  
23 increases compared to women who have no formal education.(11)  
24  
25  
26  
27  
28  
29  
30  
31  
32  
33

34 The possible explanation could be due to women with a higher level of education might be more  
35 likely to be employed, financially independent, and knowledgeable on the necessity of having  
36 antenatal care follow-up during pregnancy, as a result, they might be more likely to realize the  
37 importance of early booking their first ANC visit timely.(40) Additionally, uneducated women  
38 might have limited understanding of ANC services and their importance to their unborn fetus  
39 wellbeing and ensure safe delivery.(11) It is because education will change the knowledge when  
40 to start ANC awareness of the mothers to start and follow the health services appropriately.(18)  
41  
42  
43  
44  
45  
46

47 This study indicated that women who were formerly in union commenced ANC visit later than  
48 mothers who were currently in union at 5% level of significance. The findings of this study indicate  
49 that having the father of the child present in the woman's life during pregnancy shortens the time  
50 to first ANC attendance and highlight a need to involve male partners in reproductive health issues  
51 including maternal health care and family planning. This evidence is in line with the studies done  
52  
53  
54  
55  
56  
57  
58  
59  
60

1  
2  
3 in South Africa(24) and Rwanda(26) in which currently married women were more likely to  
4 initiate ANC in the first trimester of pregnancy.  
5  
6

7 This might be due to the fear of social rumors, and hence, lack of confidence in seeking care for  
8 unborn child whose father is not formal or in doubt. Another possible explanation can be the work  
9 load hanged on her shoulder only to improve the life of her unborn child and herself too.  
10 Furthermore, they might not know whether they are pregnant timely, and even if they knew it  
11 early, they may not be interested with the pregnancy, they may be careless for the conception and  
12 fail to book early. Women with an unwanted (24) and mistimed pregnancies (41) have been show  
13 to receive late ANC.  
14  
15  
16  
17  
18  
19

20 Grand multiparous women had a 31% longer time to start ANC early in the first trimester than  
21 primipara women. This evidence is supported by prior studies.(11,33,41,42) A study finding from  
22 India has shown that women with birth order of 4 and above had a 16% prolonged time to initiation  
23 of ANC compared to Primipara women.(33) In Malawi, women with more than five births were  
24 12% less likely to access ANC services in their first trimester of pregnancy.(42) In Nigeria, women  
25 with one birth were more likely to initiate ANC in the first trimester compared to women with five  
26 and above births.(21) In Kenya, women with four and above births were 1.75 times more likely to  
27 start their first antenatal care late in pregnancy during the second and third trimesters of pregnancy  
28 compared to the Primipara women.(41)  
29  
30  
31  
32  
33  
34  
35

36 A survival study from Ethiopia found that women with four and above births had a 20% hazard of  
37 delayed initiation of ANC follow up as compared to one parity.(11) Another population study from  
38 Ethiopia showed that multi-parous women had higher odds of delayed initiation of ANC visit when  
39 compared to the primi-parous women.(23) This might be attributable to high parity women's  
40 increased confidence from previous pregnancy and childbirth experience. Additionally, high parity  
41 women might have poor prior experience with the health system, and constraints of time and  
42 resources to access ANC services early.(38)  
43  
44  
45  
46  
47  
48  
49

50 This study also showed that women from a rural residency had a prolonged time to start their first  
51 ANC visit relative to those who were from an urban residency. In India, urban residents had a 49%  
52 probability of initiating ANC early in the first trimester of pregnancy compared to rural  
53 counterparts.(33) In SSA, women residing in the rural area were less likely to initiate ANC timely  
54  
55  
56  
57  
58  
59  
60

1  
2  
3 within 12 weeks of gestation.(10) In Nigeria, women in urban areas were more likely to make the  
4 first ANC visit early in the first trimester of pregnancy.(34) A study from Kenya showed that the  
5 odds of timely initiation of ANC in the first 3 months of pregnancy was higher in women living in  
6 urban areas compared to the rural counterparts.(41)  
7  
8  
9

10  
11 A study in Ethiopia using the 2016 EDHS data set indicated that rural women have prolonged  
12 time-to start first ANC visit than urban women.(20) In Ethiopia, women from rural residency were  
13 18% less likely to attained ANC early in pregnancy than urban counter parts.(11) Another similar  
14 study in Ethiopia showed that rural women were 59% less likely to start their first ANC visit within  
15 the first trimester than urban counterparts.(12) This might be because urban women have easier  
16 access to transportation and social media, which help them easily, obtain information about the  
17 significance, timeliness and services offered by healthcare facilities.  
18  
19  
20  
21  
22  
23

24 Place of delivery was found to be a significant predictor of the survival time to first ANC visit.  
25 Women whose last birth was in Home had a 35% longer survival time to start a first ANC visit  
26 compared to those whose last birth was in Health facility. This result is supported by the finding  
27 reported from Western Ethiopia in which women whose previous childbirth was institutional  
28 delivery were five times more likely to initiate ANC early when compared with women who had  
29 a home delivery.(43) A study from Mandera County in Kenya reported that women who utilized  
30 skilled delivery service were more likely to have used ANC services more than those who had not  
31 utilized the service.(38) A possible explanation might be that mothers who gave birth at health  
32 institutions might receive advice and relevant information regarding the importance of early  
33 antenatal booking for themselves and their fetuses, which might positively influence women's  
34 attitudes towards early ANC visits.  
35  
36  
37  
38  
39  
40  
41  
42  
43

44 This study showed that women whose last birth was caesarean section had a 25% shorter time to  
45 start first ANC than those who gave their last birth vaginally. This finding is supported with  
46 previous similar studies.(36,38,44) A study done in Uganda showed that women who gave birth  
47 by caesarean section were more likely to initiate the first ANC visit in the first trimester of  
48 pregnancy.(44) According to a study from Tanzania, women with a history of previous or current  
49 pregnancy-related complications were more likely to book earlier than others.(36) In Kenya,  
50 women who had complications during last pregnancy were two times more likely to utilize ANC  
51 than those who had no complication.(38) This might be due to the fact that women who had  
52  
53  
54  
55  
56  
57  
58  
59  
60

1  
2  
3 complications in the previous pregnancy might have worries about them-selves and their fetus's  
4 health which compels them to better use antenatal care services.  
5  
6

7  
8 In relation to the country's administrative region, women from SNNPR had a 46% longer time to  
9 start the first ANC compared to women from Addis Ababa. One possible explanation for this could  
10 be the variations in the accessibility of medical facilities. The population in the SNNPR is more  
11 dispersed, making the accessibility of health facilities difficult, and women from those areas might  
12 be less informed about the benefits of antenatal care. Additionally, women from Harari were found  
13 to have a shorter time to commence ANC.  
14  
15  
16

### 17 18 **Study limitations and strengths**

19  
20 This study used secondary data that were collected cross-sectionally through self-reported  
21 interviews, which are prone to recall errors and social desirability bias. Furthermore, some factors  
22 that are probably crucial in determining the timing of the first ANC visit, such as the standard of  
23 ANC provided and women's perceptions of the ANC, were not available for consideration in the  
24 existing EMDHS data.  
25  
26  
27

28  
29 Despite these drawbacks, the current study used a large sample from nationally representative  
30 survey data in Ethiopia. The results of the study were representative of all regions. The study also  
31 attempted to analyze community-level variables related to the survival time to initiation of the  
32 ANC visits. Another advantage of the study is its sophisticated statistical design, which allows for  
33 greater reliability of the results and allows for the control of confounding factors.  
34  
35  
36  
37  
38  
39

### 40 41 **Conclusion**

42  
43 The study indicated that women in the study area sought their initial antenatal care at a health  
44 facility far later than the WHO recommended. Early ANC initiation in the first trimester of  
45 pregnancy was positively associated with independent variables, such as women's educational  
46 attainment, media exposure, and history of caesarean delivery. Higher parity, home births, rural  
47 settlements, and previously formed but unsuccessful unions had a negative effect on the initiation  
48 of ANC services during the first trimester of pregnancy.  
49  
50  
51

52  
53 Therefore, it's crucial to provide health education with a focus on empowering expectant mothers  
54 to timely activate prenatal care, especially for those who give birth at home and for those who  
55  
56  
57  
58  
59  
60

1  
2  
3 reside in remote areas. Healthcare providers should collaborate with community health workers to  
4 provide home-based care in order to encourage prompt ANC among hard-to-reach populations,  
5 such as rural residents and those giving birth at home. This study also has the implication that  
6 policies aiming to decrease pregnancy-related preventable morbidity and mortality through the use  
7 of timely antenatal care must prioritize educating and empowering women.  
8  
9  
10  
11  
12

## 13 **Abbreviations and Acronyms**

14  
15 AAF: Adjusted Acceleration Factor; AFT: Accelerated Failure Time; ANC: Antenatal Care; CI:  
16 Confidence Interval; DHS: Demographic and Health Survey; EMDHS: Ethiopian Mini  
17 Demographic and Health Survey; ICC: Intraclass Correlation Coefficient; MAF: Median  
18 Acceleration Factor; PCV: Proportional Change in Variance; PNC: Postnatal Care.  
19  
20  
21  
22  
23

## 24 **Funding**

25  
26 There was no funding for this research.  
27  
28  
29

## 30 **Availability of data**

31  
32 The data sets used and/or analyzed during the current study are available from the corresponding  
33 author on reasonable request.  
34  
35  
36

## 37 **Declarations**

### 38 **Ethics approval and consent to participate**

39  
40  
41  
42 Ethics review and participant consent were not required for this study because it used secondary  
43 data analysis of publicly available survey data from the Measure DHS program. A written letter of  
44 permission was secured from the IRB of Demographic and Health Survey (DHS) program data  
45 archivists to download and use the data for this study from <https://www.dhsprogram.com>. This  
46 study was performed in line with the principles of the Declaration of Helsinki. The DHS data were  
47 kept confidential, and any identifying information was removed. The data was only used for this  
48 particular, authorized research project, and it would not be shared with any researchers.  
49  
50  
51  
52  
53  
54  
55  
56  
57  
58  
59  
60

## Competing interests

The authors declare that they have no competing interests.

## Acknowledgment

The authors would like to thank the MEASURE DHS Project for their free access to the original data of the 2019 Mini Demographic and Health Survey of Ethiopia.

## Author contributions

BTO and HZA conceived the study, participated in its design and coordination, initiated the research, carried out the statistical analysis, interpreted the results, and wrote the final manuscript, critically reviewing it. MA and DGT participated in the study's design, guided the statistical analysis, and critically reviewed the manuscript. HI and TG were involved in principal supervision, participated in the study's design and coordination, edited the manuscript, and critically reviewed the manuscript. BTO has main responsibility for the final content, and makes the decision to publish. The authors have read and approved the final manuscript.

## References

1. Tolossa T, Turi E, Fetensa G, Fekadu G, Kebede F. Association between pregnancy intention and late initiation of antenatal care among pregnant women in Ethiopia: A systematic review and meta-analysis. *Syst Rev*. 2020;9(1):1–10.
2. World Health Organization. WHO recommendations on antenatal care for a positive pregnancy experience. World Health Organization. 2016.
3. Raynes-Greenow C. Gaps and challenges underpinning the first analysis of global coverage of early antenatal care. *Lancet Glob Heal* [Internet]. 2017;5(10):e949–50. Available from: [http://dx.doi.org/10.1016/S2214-109X\(17\)30346-7](http://dx.doi.org/10.1016/S2214-109X(17)30346-7)
4. Moller AB, Petzold M, Chou D, Say L. Early antenatal care visit: a systematic analysis of regional and global levels and trends of coverage from 1990 to 2013. *Lancet Glob Heal* [Internet]. 2017;5(10):e977–83. Available from: [http://dx.doi.org/10.1016/S2214-109X\(17\)30325-X](http://dx.doi.org/10.1016/S2214-109X(17)30325-X)
5. Jiwani SS, Amouzou A, Carvajal-Aguirre L, Chou D, Keita Y, Moran AC, et al. Timing and number of antenatal care contacts in low-and middle-income countries: Analysis in the Countdown to 2030 priority countries. *J Glob Health*. 2020;10(1).
6. Apanga PA, Kumbeni MT. Association between early antenatal care and antenatal care

- 1  
2  
3 contacts across low-And middle-income countries: Effect modification by place of  
4 residence. *Epidemiol Health*. 2021;43:e2021092.  
5
- 6  
7 7. Agha S, Tappis H. The timing of antenatal care initiation and the content of care in Sindh,  
8 Pakistan. *BMC Pregnancy Childbirth*. 2016;16(190).  
9
- 10 8. WHO, UNICEF UNFPA, WORLD BANK GROUP and UNDESA/Population Division.  
11 Trends in maternal mortality 2000 to 2020: estimates [Internet]. WHO, Geneva. 2023.  
12 Available from: [https://www.who.int/reproductivehealth/publications/maternal-mortality-](https://www.who.int/reproductivehealth/publications/maternal-mortality-2000-2017/en/)  
13 [2000-2017/en/](https://www.who.int/reproductivehealth/publications/maternal-mortality-2000-2017/en/)  
14
- 15 9. Makate M, Makate C. Journal of Epidemiology and Global Health Prenatal care utilization  
16 in Zimbabwe : Examining the role of community-level factors. *J Epidemiol Glob Health*  
17 [Internet]. 2017;7(4):255–62. Available from: <https://doi.org/10.1016/j.jegh.2017.08.005>  
18
- 19 10. Alem AZ, Yeshaw Y, Liyew AM, Tesema GA, Alamneh TS, Worku MG, et al. Timely  
20 initiation of antenatal care and its associated factors among pregnant women in sub-  
21 Saharan Africa: A multicountry analysis of Demographic and Health Surveys. *PLoS One*  
22 [Internet]. 2022;17(1):e0262411. Available from:  
23 <http://dx.doi.org/10.1371/journal.pone.0262411>  
24
- 25 11. Dewau R, Muche A, Fentaw Z, Yalew M, Bitew G, Amsalu ET, et al. Time to initiation of  
26 antenatal care and its predictors among pregnant women in Ethiopia: Cox-gamma shared  
27 frailty model. *PLoS One* [Internet]. 2021;16(2):e0246349. Available from:  
28 <http://dx.doi.org/10.1371/journal.pone.0246349>  
29
- 30 12. Woldeamanuel BT, Belachew TA. Timing of first antenatal care visits and number of  
31 items of antenatal care contents received and associated factors in Ethiopia: multilevel  
32 mixed effects analysis. *Reprod Health* [Internet]. 2021;18(1):1–16. Available from:  
33 <https://doi.org/10.1186/s12978-021-01275-9>  
34
- 35 13. Alemu Y, Aragaw A. Early initiations of first antenatal care visit and associated factor  
36 among mothers who gave birth in the last six months preceding birth in Bahir Dar Zuria  
37 Woreda North West Ethiopia. *Reprod Health*. 2018;15(1):1–8.  
38
- 39 14. Geta MB, Yallew WW. Early Initiation of Antenatal Care and Factors Associated with  
40 Early Antenatal Care Initiation at Health Facilities in Southern Ethiopia. *Adv Public Heal*.  
41 2017;2017:1–6.  
42
- 43 15. Wolde F, Mulaw Z, Zena T, Biadgo B, Limenih MA. Determinants of late initiation for  
44 antenatal care follow up: The case of northern Ethiopian pregnant women. *BMC Res*  
45 *Notes* [Internet]. 2018;11(1):1–7. Available from: [https://doi.org/10.1186/s13104-018-](https://doi.org/10.1186/s13104-018-3938-9)  
46 [3938-9](https://doi.org/10.1186/s13104-018-3938-9)  
47
- 48 16. Weldemariam S, Damte A, Endris K, Palcon MC, Tesfay K, Berhe A, et al. Late antenatal  
49 care initiation: The case of public health centers in Ethiopia. *BMC Res Notes* [Internet].  
50 2018;11(1):1–6. Available from: [https://doi.org/10.1186/s13104-018-](https://doi.org/10.1186/s13104-018-3653-6)  
51 [3653-6](https://doi.org/10.1186/s13104-018-3653-6)  
52
- 53 17. Gebresilassie B, Belete T, Tilahun W, Berhane B, Gebresilassie S. Timing of first  
54  
55  
56  
57  
58  
59  
60



- antenatal care attendance and associated factors among pregnant women in public health institutions of Axum town, Tigray, Ethiopia, 2017: A mixed design study. *BMC Pregnancy Childbirth*. 2019;19(1):1–11.
18. Tola W, Negash E, Sileshi T, Wakgari N. Late initiation of antenatal care and associated factors among pregnant women attending antenatal clinic of Ilu Ababor Zone, southwest Ethiopia: A cross-sectional study. *PLoS One* [Internet]. 2021;16(1 January):1–11. Available from: <http://dx.doi.org/10.1371/journal.pone.0246230>
  19. Tesfaye M, Dessie Y, Demena M, Yosef T. Late antenatal care initiation and its contributors among pregnant women at selected public health institutions in Southwest Ethiopia. *Pan Afr Med J*. 2021;39.
  20. Fentaw KD, Fenta SM, Biresaw HB, Mulugeta SS. Time to first antenatal care visit among pregnant women in Ethiopia: secondary analysis of EDHS 2016; application of AFT shared frailty models. *Arch Public Heal*. 2021;79(1):1–14.
  21. Fagbamigbe AF, Olaseinde O, Fagbamigbe OS. Timing of first antenatal care contact, its associated factors and state-level analysis in Nigeria: a cross-sectional assessment of compliance with the WHO guidelines. *BMJ Open*. 2021;11(9):e047835.
  22. Agaba P, Magadi M, Onukwugha F, Misinde C. Factors associated with the timing and number of antenatal care visits among unmarried compared to married youth in Uganda between 2006 and 2016. *Soc Sci*. 2021;10(12).
  23. Yaya S, Bishwajit G, Ekholuenetale M, Shah V, Kadio B, Udenigwe O. Timing and adequate attendance of antenatal care visits among women in Ethiopia. *PLoS One*. 2017;12(9):1–16.
  24. Muhwava LS, Morojele N, London L. Psychosocial factors associated with early initiation and frequency of antenatal care (ANC) visits in a rural and urban setting in South Africa: A cross-sectional survey. *BMC Pregnancy Childbirth* [Internet]. 2016;16(1):1–9. Available from: <http://dx.doi.org/10.1186/s12884-016-0807-1>
  25. Gross K, Alba S, Glass TR, Schellenberg JA, Obrist B. Timing of antenatal care for adolescent and adult pregnant women in south-eastern Tanzania. *BMC Pregnancy Childbirth*. 2012;12.
  26. Munyaneza F, Mujawase F, Banamwana L, Sayinzoga F, Thomson DR, Ntaganira J, et al. Assessing predictors of delayed antenatal care visits in Rwanda : a secondary analysis of Rwanda demographic and health survey 2010. *BMC Pregnancy Childbirth*. 2016;14(290):1–8.
  27. Manyeh AK, Amu A, Williams J, Gyapong M. Factors associated with the timing of antenatal clinic attendance among first-time mothers in rural southern Ghana. *BMC Pregnancy Childbirth*. 2020;20(1):1–7.
  28. United Nations Department of Economic and Social Affairs PD. *World Population Prospects 2022: summary of results* [Internet]. United Nation. 2022. 1–54 p. Available

- 1  
2  
3 from: [www.un.org/development/desa/pd/](http://www.un.org/development/desa/pd/).  
4
- 5 29. World Bank. Ethiopia-GNI-per-capita [Internet]. [cited 2023 Apr 6]. Available from:  
6 <https://www.macrotrends.net/countries/ETH/ethiopia/gni-per-capita>  
7
- 8 30. Ethiopian Public Health Institute (EPHI) [Ethiopia] and ICF. Ethiopia Mini Demographic  
9 and Health Survey 2019: Key Indicators [Internet]. Rockville, Maryland, USA: EPHI and  
10 ICF; 2019. Available from: <http://www.ephi.gov.et>  
11
- 12 31. Kleinbaum DG, Klein M. Survival Analysis: A Self-Learning Text. Third Edit. Springer;  
13 2013. 292–318 p.  
14
- 15 32. StataCorp. Stata Survival Analysis Reference Manual Release 17 [Internet]. A Stata Press  
16 Publication. College Station, Texas: StataCorp LLC; 2021. Available from:  
17 <https://www.stata.com/bookstore/survival-analysis-reference-manual/>  
18
- 19 33. Tripathy A, Mishra PS. Inequality in time to first antenatal care visits and its predictors  
20 among pregnant women in India : an evidence from national family health survey. *Sci*  
21 *Rep.* 2023;13(4706).  
22
- 23 34. Fagbamigbe AF, Abel C, Mashabe B, Adebowale AS. Survival analysis and prognostic  
24 factors of the timing of first antenatal care visit in Nigeria. *Adv Integr Med* [Internet].  
25 2019;6(3):110–9. Available from: <https://doi.org/10.1016/j.aimed.2018.12.002>  
26
- 27 35. Seid A, Ahmed M. Survival time to first antenatal care visit and its predictors among  
28 women in Ethiopia. *PLoS One.* 2021;1–5.  
29
- 30 36. Kisaka L, Leshabari S. Factors Associated with First Antenatal Care Booking among  
31 Pregnant Women at a Reproductive Health Clinic in Tanzania: A Cross Sectional Study.  
32 *EC Gynaecol* [Internet]. 2020;9(2):1–12. Available from:  
33 [https://ecommons.aku.edu/eastafrica\\_fhs\\_sonam](https://ecommons.aku.edu/eastafrica_fhs_sonam)  
34
- 35 37. Edgard-Marius O, Charles SJ, Jacques S, Justine GC-C, Virginie MA, Ibrahim MA, et al.  
36 Determinants of Low Antenatal Care Services Utilization during the First Trimester of  
37 Pregnancy in Southern Benin Rural Setting. *Univers J Public Heal.* 2015;3(5):220–8.  
38
- 39 38. Adow I, Mwanzo I, Agina O, Wanzala P, Kariuki J. Uptake of antenatal care services  
40 among women of reproductive age in Mandera County, Kenya. *Afr J Health Sci* [Internet].  
41 2020;33(1):56–69. Available from:  
42 [https://indexmedicus.afro.who.int/AIM/opac\\_css/doc\\_num.php?explnum\\_id=73592](https://indexmedicus.afro.who.int/AIM/opac_css/doc_num.php?explnum_id=73592)  
43
- 44 39. Gilles MT. Timing of First Antenatal Care ( ANC ) and Inequalities in Early Initiation of  
45 ANC in Nepal. 2017;5(September):1–6.  
46
- 47 40. Tesfu A., Aweke A., Gela G., Wudineh K., Beyene F. Factors associated with timely  
48 initiation of antenatal care among pregnant women in Bahir Dar city , Northwest  
49 Ethiopia : sectional study. 2022;(December 2021):1210–7.  
50
- 51 41. Ochako R, Gichuhi W. Pregnancy wantedness, frequency and timing of antenatal care  
52 visit among women of childbearing age in Kenya. *Reprod Health.* 2016;13(51).  
53  
54  
55  
56  
57  
58  
59  
60

- 1  
2  
3 42. Kuuire VZ, Kangmennaang J, Atuoye KN, Antabe R, Boamah SA, Vercillo S, et al.  
4 Timing and utilisation of antenatal care service in Nigeria and Malawi. *Glob Public*  
5 *Health*. 2017;12(6):711–27.  
6  
7 43. Gelassa FR, Tafasa SM, Kumera D. Determinants of early antenatal care booking among  
8 pregnant mothers attending antenatal care at public health facilities in the Nole Kaba  
9 district, western Ethiopia: unmatched case-control study. *BMJ Open*. 2023;13:e073228.  
10  
11 44. Bbaale E. Factors influencing timing and frequency of antenatal care in Uganda. *Australas*  
12 *Med J*. 2011;4(8):431–8.  
13  
14  
15  
16  
17  
18  
19  
20  
21  
22  
23  
24  
25  
26  
27  
28  
29  
30  
31  
32  
33  
34  
35  
36  
37  
38  
39  
40  
41  
42  
43  
44  
45  
46  
47  
48  
49  
50

51 **Table 1 Summary of individual and community level factors of time to ANC initiation**  
52 **among study participants (2924), 2022**  
53

| Variables | Categories | Time to ANC initiation | Total N (%) |
|-----------|------------|------------------------|-------------|
|-----------|------------|------------------------|-------------|

|                           |                 | Event N<br>(%) | Censored N<br>(%) |            |
|---------------------------|-----------------|----------------|-------------------|------------|
| Maternal education        | Higher          | 105(68.6)      | 48(31.4)          | 153(5.2)   |
|                           | Secondary       | 130(38.8)      | 205(61.2)         | 335(11.5)  |
|                           | Primary         | 452(39.2)      | 701(60.8)         | 1153(39.4) |
|                           | No education    | 404(31.5)      | 879(68.5)         | 1283(43.9) |
| Wealth Index              | Rich            | 647(48)        | 701(52)           | 1348(46.1) |
|                           | Middle          | 182(31)        | 407(69)           | 589(20.1)  |
|                           | Poor            | 264(26.7)      | 723(73.3)         | 987(33.8)  |
| Household size (members)  | 1-5             | 692(43.3)      | 907(56.7)         | 1599(54.7) |
|                           | 6 or more       | 401(30.3)      | 924(69.7)         | 1325(45.3) |
| Maternal age              | <20 years       | 48(31.4)       | 105(68.6)         | 153(5.2)   |
|                           | 20-34 years     | 846(39.2)      | 1310(60.8)        | 2156(73.8) |
|                           | ≥35 years       | 199(32.4)      | 416(67.6)         | 615(21)    |
| Household head            | Female          | 156(40.4)      | 230(59.6)         | 386(13.2)  |
|                           | Male            | 937(36.9)      | 1601(63.1)        | 2538(86.8) |
| Place of delivery         | Facility        | 801(42.4)      | 1088(57.6)        | 1889(64.6) |
|                           | Home            | 292(28.2)      | 743(71.8)         | 1035(35.4) |
| PNC                       | No              | 881(36.5)      | 1532(63.5)        | 2413(82.5) |
|                           | Yes             | 212(41.5)      | 299(58.5)         | 511(17.5)  |
| Last birth C/S            | No              | 804(34.9)      | 1502(65.1)        | 2306(92.2) |
|                           | Yes             | 114(58.5)      | 81(41.5)          | 195(7.8)   |
| Birth interval (2220)     | ≥36 months      | 478(37.6)      | 792(62.4)         | 1270(57.2) |
|                           | <36 months      | 305(32.1)      | 645(67.9)         | 950(42.8)  |
| Ever had a child loss     | No              | 939(39.7)      | 1429(60.3)        | 2368(81)   |
|                           | Yes             | 154(27.7)      | 402(72.3)         | 556(9)     |
| Parity                    | Primi-para      | 299(43.4)      | 390(56.6)         | 689(23.6)  |
|                           | Multipara       | 559(40.8)      | 811(59.2)         | 1370(46.8) |
|                           | Grand Multipara | 235(27.2)      | 630(72.8)         | 865(29.6)  |
| Residence                 | Urban           | 445(51)        | 427(49)           | 872(29.8)  |
|                           | Rural           | 647(31.5)      | 1405(68.5)        | 2052(70.2) |
| Community ANC utilization | High            | 718(43.3)      | 937(56.6)         | 1655(56.6) |
|                           | Low             | 375(29.6)      | 894(70.4)         | 1269(43.4) |
| Community women education | High            | 696(39.7)      | 1056(60.3)        | 1752(59.9) |
|                           | Low             | 397(33.9)      | 775(66.1)         | 1172(40.1) |
| Community level poverty   | Low             | 740(46.9)      | 837(53.1)         | 1577(53.9) |
|                           | High            | 353(26.2)      | 994(73.8)         | 1347(46.1) |

**Note:** ANC = antenatal care; PNC = postnatal care; C/S = cesarean section

**Table 2 Comparison of survival time of individual and community level factors of time to ANC initiation among study participants (2924), 2022**

| Variables                 | Categories         | Time to ANC initiation |                | Log-rank test | P-value |
|---------------------------|--------------------|------------------------|----------------|---------------|---------|
|                           |                    | Event observed         | Event expected |               |         |
| Mothers education         | No education       | 404                    | 488            | 114.88        | 0.0001  |
|                           | Primary            | 452                    | 431            |               |         |
|                           | Secondary          | 131                    | 126            |               |         |
|                           | Higher             | 105                    | 47             |               |         |
| Household size            | <6 members         | 692                    | 585            | 54.22         | 0.0001  |
|                           | ≥6 members         | 400                    | 507            |               |         |
| Ever had a child loss     | No                 | 938                    | 876            | 28.21         | 0.0001  |
|                           | Yes                | 154                    | 216            |               |         |
| Women age                 | <20 years          | 49                     | 57             | 11.48         | 0.0032  |
|                           | 20-34 years        | 845                    | 802            |               |         |
|                           | ≥35 years          | 198                    | 233            |               |         |
| Birth interval            | ≥36 months         | 477                    | 442            | 8.49          | 0.0036  |
|                           | <36 months         | 305                    | 340            |               |         |
| PNC                       | No                 | 881                    | 909            | 6.82          | 0.0090  |
|                           | Yes                | 211                    | 183            |               |         |
| Marital status            | Currently in union | 1030                   | 1029           | 4.53          | 0.1039  |
|                           | Formerly in union  | 54                     | 59             |               |         |
|                           | Never in union     | 8                      | 4              |               |         |
| Household head            | Female             | 156                    | 140            | 2.68          | 0.1018  |
|                           | Male               | 936                    | 952            |               |         |
| Community level poverty   | Low                | 739                    | 569            | 136.88        | 0.0001  |
|                           | High               | 353                    | 523            |               |         |
| Residence                 | Urban              | 445                    | 310            | 105.30        | 0.0001  |
|                           | Rural              | 647                    | 782            |               |         |
| Community ANC utilization | High               | 717                    | 606            | 58.21         | 0.0001  |
|                           | Low                | 375                    | 486            |               |         |
| Community women education | High               | 695                    | 645            | 12.27         | 0.0005  |
|                           | Low                | 397                    | 447            |               |         |

**Note:** ANC = antenatal care; PNC = postnatal care

**Table 3 Measures of variation and model fit statistics for time to first ANC visit among women in Ethiopia, 2023**

|                             | <b>Null model</b> | <b>Model II</b> | <b>Model III</b> | <b>Model IV</b> |
|-----------------------------|-------------------|-----------------|------------------|-----------------|
| <b>Random effect result</b> |                   |                 |                  |                 |
| Variance                    | 0.7686926         | 0.519486        | 0.4981052        | 0.4178334       |
| ICC (%)                     | 18.9              | 13.6            | 13.1             | 11.3            |
| PCV (%)                     | Reference         | 32.4            | 4.12             | 16.1            |
| MAF                         | 2.31              | 1.99            | 1.96             | 1.85            |
| <b>Model fit statistics</b> |                   |                 |                  |                 |
| -Log likelihood             | -2343.361         | -2086.979       | -2281.065        | -2010.789       |
| AIC                         | 4692.722          | 4203.958        | 4594.130         | 4075.578        |
| DIC                         | 4686.722          | 4173.958        | 4562.130         | 4021.578        |

**Table 4 Mixed-effects Weibull AFT survival regression of time to first ANC visit among women in Ethiopia, 2023**

| Variables           | Categories          | Null Model | Model II           | Model III           | Model IV           |
|---------------------|---------------------|------------|--------------------|---------------------|--------------------|
| Place of last birth | Facility            |            | 1                  |                     | 1                  |
|                     | Home                |            | 1.11(0.98, 1.25)   |                     | 1.35(1.13, 1.61)** |
| Parity              | Primipara           |            | 1                  |                     | 1                  |
|                     | Multipara           |            | 1.09(0.96, 1.25)   |                     | 1.07(0.89, 1.28)   |
|                     | Grand multipara     |            | 1.19(1.03, 1.40)*  |                     | 1.31(1.04, 1.63)*  |
| Media Access        | No                  |            | 1                  |                     | 1                  |
|                     | Yes                 |            | 0.83(0.73, 0.94)** |                     | 0.90(0.76, 1.06)   |
| Last birth          | Vaginal             |            | 1                  |                     | 1                  |
|                     | C/S                 |            | 0.86(0.75, 0.98)*  |                     | 0.75(0.61, 0.93)** |
| Educational level   | No formal education |            | 1                  |                     | 1                  |
|                     | Primary             |            | 0.97(0.87, 1.09)   |                     | 0.87(0.73, 1.03)   |
|                     | Secondary           |            | 1.16(1.01, 1.34)*  |                     | 0.99(0.75, 1.33)   |
|                     | Higher              |            | 0.84(0.70, 0.99)*  |                     | 0.69(0.50, 0.95)*  |
| Marital status      | Currently in union  |            | 1                  |                     | 1                  |
|                     | Formerly in union   |            | 1.12(0.88, 1.44)   |                     | 1.47(1.07, 2.00)*  |
|                     | Never in union      |            | 0.64(0.37, 1.09)   |                     | 1.12(0.37, 3.40)   |
| PNC                 | No                  |            | 1                  |                     | 1                  |
|                     | Yes                 |            | 0.87(0.75, 1.00)   |                     | 0.83(0.67, 1.02)   |
| Community ANC       | Low                 |            |                    | 1                   | 1                  |
|                     | High                |            |                    | 0.95(0.85, 1.07)    | 0.90(0.77, 1.05)   |
| Community Education | Low                 |            |                    | 1                   | 1                  |
|                     | High                |            |                    | 0.95(0.85, 1.06)    | 1.15(0.99, 1.34)   |
| Residency           | Urban               |            |                    | 1                   | 1                  |
|                     | Rural               |            |                    | 1.15(1.01, 1.32)*   | 1.25(1.03, 1.52)*  |
| Region              | Addis Ababa         |            |                    | 1                   | 1                  |
|                     | Tigray              |            |                    | 1.20(0.96, 1.48)    | 1.04(0.80, 1.35)   |
|                     | Afar                |            |                    | 1.07(0.85, 1.34)    | 0.93(0.69, 1.24)   |
|                     | Amhara              |            |                    | 1.03(0.81, 1.31)    | 0.95(0.72, 1.26)   |
|                     | Oromia              |            |                    | 1.37(1.12, 1.68)**  | 1.08(0.81, 1.43)   |
|                     | Somalia             |            |                    | 1.03(0.68, 1.57)    | 1.17(0.81, 1.70)   |
|                     | Benishangul         |            |                    | 1.21(0.97, 1.52)    | 1.19(0.89, 1.60)   |
|                     | SNNPR               |            |                    | 1.50(1.23, 1.84)*** | 1.46(1.02, 2.10)*  |
|                     | Gambella            |            |                    | 1.39(1.11, 1.73)**  | 1.23(0.92, 1.65)   |
|                     | Harari              |            |                    | 0.97(0.79, 1.21)    | 0.80(0.65, 0.99)*  |
| Dire Dawa           |                     |            | 0.93(0.76, 1.15)   | 0.82(0.65, 1.05)    |                    |

**Note:** P-value: \*  $p < 0.05$ ; \*\*  $p < 0.01$ ; \*\*\*  $p < 0.001$ , 1 = Reference category

1  
2  
3  
4  
5  
6  
7  
8  
9  
10  
11  
12  
13  
14  
15  
16  
17  
18  
19  
20  
21  
22  
23  
24  
25  
26  
27  
28  
29  
30  
31  
32  
33  
34  
35  
36  
37  
38  
39  
40  
41  
42  
43  
44  
45  
46  
47  
48  
49  
50  
51  
52  
53  
54  
55  
56  
57  
58  
59  
60

**Figure 1 Mixed-effects AFT Weibull regression of time to first ANC visit by place of residence**

**Supplemental Table 1 Comparison of Mixed-effects AFT model with different baseline distributions**

For peer review only



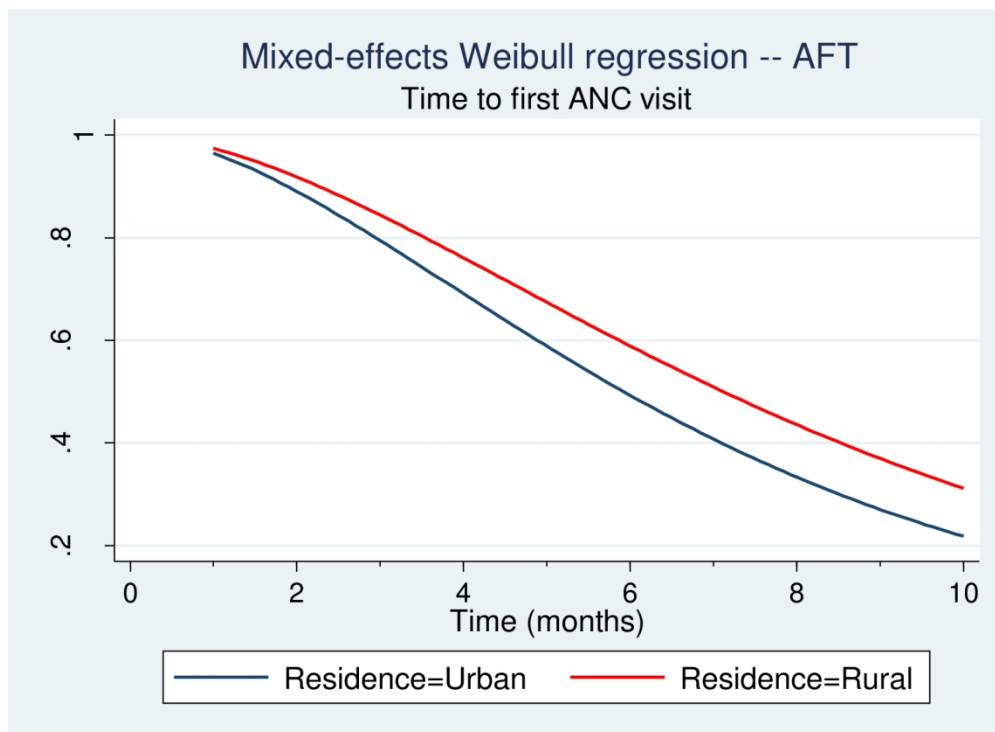

Figure 1 Mixed-effects AFT Weibull regression of time to first ANC visit by place of residence

139x101mm (300 x 300 DPI)

**Supplemental Table 1 Comparison of Mixed-effects AFT model with different baseline distributions**

| Model        | Parameters | -Log Likelihood value (Full) | DIC value | AIC value | BIC      |
|--------------|------------|------------------------------|-----------|-----------|----------|
| Exponential  | 26         | -2990.973                    | 5981.947  | 6033.947  | 6185.538 |
| Weibull      | 27         | -2010.789                    | 4021.578  | 4075.578  | 4232.999 |
| Log-normal   | 27         | -2771.332                    | 5542.664  | 5596.664  | 5754.086 |
| Log-logistic | 27         | -2797.825                    | 5595.650  | 5649.650  | 5807.071 |
| Gamma        | 27         | -2817.554                    | 5635.108  | 5689.108  | 5846.530 |

## STROBE Statement—checklist of items that should be included in reports of observational studies

|                           | Item No | Recommendation                                                                                                                                                                                                                                                                                                                                                                                                                                                         | Page No        |
|---------------------------|---------|------------------------------------------------------------------------------------------------------------------------------------------------------------------------------------------------------------------------------------------------------------------------------------------------------------------------------------------------------------------------------------------------------------------------------------------------------------------------|----------------|
| <b>Title and abstract</b> | 1       | (a) Indicate the study's design with a commonly used term in the title or the abstract                                                                                                                                                                                                                                                                                                                                                                                 | 1              |
|                           |         | (b) Provide in the abstract an informative and balanced summary of what was done and what was found                                                                                                                                                                                                                                                                                                                                                                    | 2              |
| <b>Introduction</b>       |         |                                                                                                                                                                                                                                                                                                                                                                                                                                                                        |                |
| Background/rationale      | 2       | Explain the scientific background and rationale for the investigation being reported                                                                                                                                                                                                                                                                                                                                                                                   | 3-5            |
| Objectives                | 3       | State specific objectives, including any prespecified hypotheses                                                                                                                                                                                                                                                                                                                                                                                                       | 5              |
| <b>Methods</b>            |         |                                                                                                                                                                                                                                                                                                                                                                                                                                                                        |                |
| Study design              | 4       | Present key elements of study design early in the paper                                                                                                                                                                                                                                                                                                                                                                                                                | 5-6            |
| Setting                   | 5       | Describe the setting, locations, and relevant dates, including periods of recruitment, exposure, follow-up, and data collection                                                                                                                                                                                                                                                                                                                                        | 5              |
| Participants              | 6       | (a) <i>Cohort study</i> —Give the eligibility criteria, and the sources and methods of selection of participants. Describe methods of follow-up<br><i>Case-control study</i> —Give the eligibility criteria, and the sources and methods of case ascertainment and control selection. Give the rationale for the choice of cases and controls<br><i>Cross-sectional study</i> —Give the eligibility criteria, and the sources and methods of selection of participants | 6              |
|                           |         | (b) <i>Cohort study</i> —For matched studies, give matching criteria and number of exposed and unexposed<br><i>Case-control study</i> —For matched studies, give matching criteria and the number of controls per case                                                                                                                                                                                                                                                 | Not Applicable |
| Variables                 | 7       | Clearly define all outcomes, exposures, predictors, potential confounders, and effect modifiers. Give diagnostic criteria, if applicable                                                                                                                                                                                                                                                                                                                               | 6-7            |
| Data sources/measurement  | 8*      | For each variable of interest, give sources of data and details of methods of assessment (measurement). Describe comparability of assessment methods if there is more than one group                                                                                                                                                                                                                                                                                   | 5-8            |
| Bias                      | 9       | Describe any efforts to address potential sources of bias                                                                                                                                                                                                                                                                                                                                                                                                              |                |
| Study size                | 10      | Explain how the study size was arrived at                                                                                                                                                                                                                                                                                                                                                                                                                              | 5-6            |
| Quantitative variables    | 11      | Explain how quantitative variables were handled in the analyses. If applicable, describe which groupings were chosen and why                                                                                                                                                                                                                                                                                                                                           | 7-9            |
| Statistical methods       | 12      | (a) Describe all statistical methods, including those used to control for confounding                                                                                                                                                                                                                                                                                                                                                                                  | 8-10           |
|                           |         | (b) Describe any methods used to examine subgroups and interactions                                                                                                                                                                                                                                                                                                                                                                                                    | 8              |
|                           |         | (c) Explain how missing data were addressed                                                                                                                                                                                                                                                                                                                                                                                                                            |                |
|                           |         | (d) <i>Cohort study</i> —If applicable, explain how loss to follow-up was addressed<br><i>Case-control study</i> —If applicable, explain how matching of cases and controls was addressed<br><i>Cross-sectional study</i> —If applicable, describe analytical methods taking account of sampling strategy                                                                                                                                                              | Not Applicable |
|                           |         | (e) Describe any sensitivity analyses                                                                                                                                                                                                                                                                                                                                                                                                                                  | Not Applicable |

1  
2 Continued on next page  
3

4 **Results**

|                   |     |                                                                                                                                                                                                              |                                                                                                                |
|-------------------|-----|--------------------------------------------------------------------------------------------------------------------------------------------------------------------------------------------------------------|----------------------------------------------------------------------------------------------------------------|
| Participants      | 13* | (a) Report numbers of individuals at each stage of study—eg numbers potentially eligible, examined for eligibility, confirmed eligible, included in the study, completing follow-up, and analysed            | 5-6 and 10                                                                                                     |
|                   |     | (b) Give reasons for non-participation at each stage                                                                                                                                                         | 5-6 and 10                                                                                                     |
|                   |     | (c) Consider use of a flow diagram                                                                                                                                                                           | Not Applicable (eligible and actual study participants were narrated briefly on page 5-6 and 11, respectively) |
| Descriptive data  | 14* | (a) Give characteristics of study participants (eg demographic, clinical, social) and information on exposures and potential confounders                                                                     | 10-11                                                                                                          |
|                   |     | (b) Indicate number of participants with missing data for each variable of interest                                                                                                                          | 11 (Table 1)                                                                                                   |
|                   |     | (c) <i>Cohort study</i> —Summarise follow-up time (eg, average and total amount)                                                                                                                             | 10                                                                                                             |
| Outcome data      | 15* | <i>Cohort study</i> —Report numbers of outcome events or summary measures over time                                                                                                                          | 10                                                                                                             |
|                   |     | <i>Case-control study</i> —Report numbers in each exposure category, or summary measures of exposure                                                                                                         | Not Applicable                                                                                                 |
|                   |     | <i>Cross-sectional study</i> —Report numbers of outcome events or summary measures                                                                                                                           | Not Applicable                                                                                                 |
| Main results      | 16  | (a) Give unadjusted estimates and, if applicable, confounder-adjusted estimates and their precision (eg, 95% confidence interval). Make clear which confounders were adjusted for and why they were included | 13                                                                                                             |
|                   |     | (b) Report category boundaries when continuous variables were categorized                                                                                                                                    | Not Applicable                                                                                                 |
|                   |     | (c) If relevant, consider translating estimates of relative risk into absolute risk for a meaningful time period                                                                                             | Not Applicable                                                                                                 |
| Other analyses    | 17  | Report other analyses done—eg analyses of subgroups and interactions, and sensitivity analyses                                                                                                               | 8 (The data was checked for effect modification or interaction factor)                                         |
| <b>Discussion</b> |     |                                                                                                                                                                                                              |                                                                                                                |
| Key results       | 18  | Summarise key results with reference to study objectives                                                                                                                                                     | 13                                                                                                             |
| Limitations       | 19  | Discuss limitations of the study, taking into account sources of potential bias or imprecision. Discuss both direction and magnitude of any potential bias                                                   | 18                                                                                                             |
| Interpretation    | 20  | Give a cautious overall interpretation of results considering objectives,                                                                                                                                    | 14-17                                                                                                          |

|                          |    |                                                                                                                                                               |    |
|--------------------------|----|---------------------------------------------------------------------------------------------------------------------------------------------------------------|----|
|                          |    | limitations, multiplicity of analyses, results from similar studies, and other relevant evidence                                                              |    |
| Generalisability         | 21 | Discuss the generalisability (external validity) of the study results                                                                                         | 18 |
| <b>Other information</b> |    |                                                                                                                                                               |    |
| Funding                  | 22 | Give the source of funding and the role of the funders for the present study and, if applicable, for the original study on which the present article is based | 19 |

\*Give information separately for cases and controls in case-control studies and, if applicable, for exposed and unexposed groups in cohort and cross-sectional studies.

**Note:** An Explanation and Elaboration article discusses each checklist item and gives methodological background and published examples of transparent reporting. The STROBE checklist is best used in conjunction with this article (freely available on the Web sites of PLoS Medicine at <http://www.plosmedicine.org/>, Annals of Internal Medicine at <http://www.annals.org/>, and Epidemiology at <http://www.epidem.com/>). Information on the STROBE Initiative is available at [www.strobe-statement.org](http://www.strobe-statement.org).
