# Supplementary material for: Time to initiation of antenatal care and its predictors among pregnant women in Ethiopia: a multilevel mixed-effects acceleration failure time model
Source: PubMed Central journal article supplement — BMJ Open. 2024 Apr 19;14(4):e075965. doi: 10.1136/bmjopen-2023-075965 (PMC11033649; doi:10.1136/bmjopen-2023-075965), 2024-04-19
Supplement: bmjopen-2023-075965supp001.pdf [file bmjopen-2023-075965supp001.pdf]

**Supplemental Table 1 Comparison of Mixed-effects AFT model with different baseline distributions**

| Model        | Parameters | -Log Likelihood value (Full) | DIC value | AIC value | BIC      |
|--------------|------------|------------------------------|-----------|-----------|----------|
| Exponential  | 26         | -2990.973                    | 5981.947  | 6033.947  | 6185.538 |
| Weibull      | 27         | -2010.789                    | 4021.578  | 4075.578  | 4232.999 |
| Log-normal   | 27         | -2771.332                    | 5542.664  | 5596.664  | 5754.086 |
| Log-logistic | 27         | -2797.825                    | 5595.650  | 5649.650  | 5807.071 |
| Gamma        | 27         | -2817.554                    | 5635.108  | 5689.108  | 5846.530 |
